# Supplementary material for: Practical metrics for establishing the health benefits of research to support research prioritisation
Source: BMJ Glob Health. 2020 Aug 31;5(8):e002152. doi: 10.1136/bmjgh-2019-002152 (PMC7462234; doi:10.1136/bmjgh-2019-002152)
Supplement: Supplementary data [file bmjgh-2019-002152supp002.xlsm]

## Sheet: Introduction
	A practical tool for establishing the health benefits of research to support research prioritisation
	This tool provides an intuitive illustration of how to estimate the health benefits of research and a practical means for estimating the value of collecting further information on a study endpoint in certain circumstances (often called the Expected Value of Partial Perfect Information, EVPPI). It is intended to be used when standard approaches, which require probabilistic analyses of a model alre…
	This tool should be used with reference to the accompanying paper: Woods, Beth; Schmitt, Laetitia; Rothery, Claire; Phillips, Andrew; Hallett, Timothy B; Revill, Paul; Claxton, Karl. Practical metrics for establishing the health benefits of research to support research prioritisation. BMJ Global Health (under review).
	If you get stuck or something doesn't work with the tool please let us know via the corresponding author: beth.woods@york.ac.uk

## Sheet: User_entry
	Instructions
	Please insert information in to the green cells
	When you have filled in the information required you can view the results on the "Results" tab
	Note that although the tool refers to DALYs averted, it can be used with data on QALYs gained without modification.
	Note that although the tool users US$ for illustration, it can be used to make calculations in any currency.
	Current understanding of the study endpoint				Notes:
	What type of endpoint is this?			Proportion or probability
	Distribution selected			Beta
	What is themean value of this endpoint?			0.1	Enter values on natural (not log) scale
	What is the standard error for this endpoint?			0.04	Enter values on natural (not log) scale
	Here is a summary of the data you have entered on the natural scale			Mean: 0.10, 95% confidence interval: 0.04 to 0.19
	Cost-effectiveness of intervention of interest				Notes
	How many DALYs is the intervention expected to avert on average compared to current care			2000	Enter discounted value
	What are the total incremental costs of the intervention on average compared to current care?			450000	Enter discounted value
	Enter a cost-effectiveness threshold describing the opportunity cost of health care funds			300	per DALY averted
	Are the numbers above for one patient or all patients expected to receive the intervention over time			All patients
					years
					per annum
	Impact of changes in endpoint on DALYs averted and costs
	In the tables below describe how DALYs averted and costs change for different values of the endpoint
	Notes: data can be entered for between 2 and 20 values of the endpoint, the values of the endpoint used for costs and DALYs do not have to match
	For hazard ratio, relative risk and odds ratio endpoints please enter values of the endpoint on the natural (i.e. not log) scale
	Values of endpoint	DALYs averted compared to current care		Values of endpoint	Total costs compared to current care
1	0.1	2000	1	0.1	450000
2	0.04	1000	2
3	0.19	3000	3
4			4
5			5
6			6
7			7
8			8
9			9
10			10
11			11
12			12
13			13
14			14
15			15
16			16
17			17
18			18
19			19
20			20
	Preferred function fitted to model how DALYs averted change with the endpoint			Preferred function fitted to model how costs incurred change with endpoint
	Notes: The options below fit a regression model to the estimates provided. Users can specify different functional forms for these regressions. Users should review the correspondence between the information they have entered (blue dots) and the regression predictions (grey line), R-squared values are alo provided. Users should also consider carefully whether the relationship between DALYs averted/…
	Linear			Linear

## Sheet: Results
	Net health benefit of intervention							Summary of value of information analysis
								Implications of decision making without further research
								Expected DALYs averted by programme	1867.95
								Expected additional long-term costs associated with programme	449955
								Expected health opportunity costs of funding programme	1499.85
								Incremental cost-effectiveness ratio ($/DALY)	240.882
								Expected net DALYs averted by implementation	368.098
	Current understanding of the study endpoint							Implications of decision making informed by further research
								Value of endpoint at which decision changes	0.0722307
								Probability further research could change decision	0.262755
								Expected net DALYs averted via research	59.3872
								Potential maximum expenditure on study	17816.2
								Total expected net DALYs averted	427.485
	Note: if the trigger point is outside the plausible range for the endpoint (i.e. not between the 0.01% to 99.99% confidence bounds) then it is not shown. The tool is not currently set up for contexts where there are multiple values of the endpoint at which the decision changes as these are, from our experience, unusual in practise.

## Sheet: Computations
	Information relating to the prior
	Distribution selected for prior		Beta
	Parameter 1	Alpha	5.525
	Parameter 2	Beta	49.725
	Mean on natural scale		0.1
	95% CI	2.5% on distribution	0.036323
		97.5% on distribution	0.190845
	Lowest bound for calculations	0.01% on distribution	0.0110887
	Highest bound for calculations	99.99% on distribution	0.302936
	Interval for discretising distribution		0.000291847
	Functions fitted to cost and DALY data
		Outcomes model				Costs model
	Linear			13157.9	552.632			0	450000
	Exponential			7.10154	6.72384			0	13.017
	Logarithmic			1270.44	5041.52			0	450000
	Polynomial - quadratic		-37037	21851.9	185.185		0	0	450000
	Polynomial - cubic	0	-37037	21851.9	185.185	0	0	0	450000
	Fit statistics for selected models
	Selected model outcomes	Linear	Linear (R-squared=0.99)			Selected model costs	Linear	Linear (R-squared=1.00)
	13157.9	552.632	#N/A	#N/A		0	450000	#N/A	#N/A
	1519.34	191.582	#N/A	#N/A		0	0	#N/A	#N/A
	0.986842	162.221	#N/A	#N/A		1	0	#N/A	#N/A
	75	1	#N/A	#N/A		#NUM!	0	#N/A	#N/A
	1.97368e+06	26315.8	#N/A	#N/A		0	0	#N/A	#N/A
	Multiplier for population size			1	This calculates the net present value for the time horizon specified assuming a constant flow of patients
	Intervention expected to be cost-effective:			Yes
	Always cost-effective?			FALSE
	Never cost-effective?			FALSE
	Summary of value of information analysis
	Implications of decision making without further research
	Expected DALYs averted by programme			1867.95
	Expected additional long-term costs associated with programme			449955
	Expected health opportunity costs of funding programme			1499.85
	Incremental cost-effectiveness ratio ($/DALY)			240.882
	Expected net DALYs averted by implementation			368.098
	Implications of decision making informed by further research
	Value of endpoint at which decision changes			0.0722307
	Probability further research could change decision			0.262755
	Expected net DALYs averted via research			59.3872
	Potential maximum expenditure on study			17816.2
	Total expected net DALYs averted			427.485
Index	Lower bound interval	Upper bound interval	Midpoint	Cumulative density	Density within interval	Predicted DALYs averted	Predicted costs incurred	Net DALYs | endpoint	Net DALYs with research		Selected models		Outcomes predicted by different functions					Costs predicted by different functions
											Outcomes	Costs	Linear	Exponential	Logarithmic	Polynomial - quadratic	Polynomial - cubic	Linear	Exponential	Logarithmic	Polynomial - quadratic	Polynomial - cubic
1	0.0110887	0.0113805	0.0112346	0.000114056	0.000114056	700.455	450000	-799.545	0		700.455	450000	700.455	901.106	-661.182	426.007	426.007	450000	450000	450000	450000	450000
2	0.0113805	0.0116724	0.0115265	0.000129616	1.55598e-05	704.295	450000	-795.705	0		704.295	450000	704.295	902.975	-628.601	432.139	432.139	450000	450000	450000	450000	450000
3	0.0116724	0.0119642	0.0118183	0.00014679	1.71745e-05	708.136	450000	-791.864	0		708.136	450000	708.136	904.849	-596.834	438.264	438.264	450000	450000	450000	450000	450000
4	0.0119642	0.0122561	0.0121101	0.000165695	1.89046e-05	711.976	450000	-788.024	0		711.976	450000	711.976	906.726	-565.842	444.383	444.383	450000	450000	450000	450000	450000
5	0.0122561	0.0125479	0.012402	0.000186449	2.07542e-05	715.816	450000	-784.184	0		715.816	450000	715.816	908.607	-535.588	450.495	450.495	450000	450000	450000	450000	450000
6	0.0125479	0.0128398	0.0126938	0.000209177	2.27277e-05	719.656	450000	-780.344	0		719.656	450000	719.656	910.492	-506.038	456.601	456.601	450000	450000	450000	450000	450000
7	0.0128398	0.0131316	0.0129857	0.000234006	2.48293e-05	723.496	450000	-776.504	0		723.496	450000	723.496	912.381	-477.16	462.701	462.701	450000	450000	450000	450000	450000
8	0.0131316	0.0134235	0.0132775	0.000261069	2.70632e-05	727.336	450000	-772.664	0		727.336	450000	727.336	914.274	-448.924	468.795	468.795	450000	450000	450000	450000	450000
9	0.0134235	0.0137153	0.0135694	0.000290503	2.94335e-05	731.176	450000	-768.824	0		731.176	450000	731.176	916.171	-421.301	474.882	474.882	450000	450000	450000	450000	450000
10	0.0137153	0.0140072	0.0138612	0.000322447	3.19444e-05	735.016	450000	-764.984	0		735.016	450000	735.016	918.072	-394.267	480.963	480.963	450000	450000	450000	450000	450000
11	0.0140072	0.014299	0.0141531	0.000357047	3.45998e-05	738.856	450000	-761.144	0		738.856	450000	738.856	919.976	-367.795	487.037	487.037	450000	450000	450000	450000	450000
12	0.014299	0.0145909	0.0144449	0.000394451	3.74038e-05	742.696	450000	-757.304	0		742.696	450000	742.696	921.885	-341.864	493.106	493.106	450000	450000	450000	450000	450000
13	0.0145909	0.0148827	0.0147368	0.000434811	4.03603e-05	746.537	450000	-753.463	0		746.537	450000	746.537	923.798	-316.452	499.168	499.168	450000	450000	450000	450000	450000
14	0.0148827	0.0151745	0.0150286	0.000478284	4.3473e-05	750.377	450000	-749.623	0		750.377	450000	750.377	925.714	-291.538	505.223	505.223	450000	450000	450000	450000	450000
15	0.0151745	0.0154664	0.0153205	0.00052503	4.67458e-05	754.217	450000	-745.783	0		754.217	450000	754.217	927.635	-267.103	511.273	511.273	450000	450000	450000	450000	450000
16	0.0154664	0.0157582	0.0156123	0.000575212	5.01822e-05	758.057	450000	-741.943	0		758.057	450000	758.057	929.56	-243.13	517.316	517.316	450000	450000	450000	450000	450000
17	0.0157582	0.0160501	0.0159042	0.000628998	5.3786e-05	761.897	450000	-738.103	0		761.897	450000	761.897	931.488	-219.6	523.352	523.352	450000	450000	450000	450000	450000
18	0.0160501	0.0163419	0.016196	0.000686558	5.75606e-05	765.737	450000	-734.263	0		765.737	450000	765.737	933.421	-196.498	529.383	529.383	450000	450000	450000	450000	450000
19	0.0163419	0.0166338	0.0164879	0.000748068	6.15093e-05	769.577	450000	-730.423	0		769.577	450000	769.577	935.357	-173.809	535.407	535.407	450000	450000	450000	450000	450000
20	0.0166338	0.0169256	0.0167797	0.000813703	6.56355e-05	773.417	450000	-726.583	0		773.417	450000	773.417	937.298	-151.518	541.425	541.425	450000	450000	450000	450000	450000
21	0.0169256	0.0172175	0.0170716	0.000883646	6.99425e-05	777.257	450000	-722.743	0		777.257	450000	777.257	939.243	-129.611	547.436	547.436	450000	450000	450000	450000	450000
22	0.0172175	0.0175093	0.0173634	0.000958079	7.44332e-05	781.097	450000	-718.903	0		781.097	450000	781.097	941.191	-108.076	553.441	553.441	450000	450000	450000	450000	450000
23	0.0175093	0.0178012	0.0176552	0.00103719	7.91108e-05	784.937	450000	-715.063	0		784.937	450000	784.937	943.144	-86.8998	559.44	559.44	450000	450000	450000	450000	450000
24	0.0178012	0.018093	0.0179471	0.00112117	8.3978e-05	788.778	450000	-711.222	0		788.778	450000	788.778	945.101	-66.0707	565.433	565.433	450000	450000	450000	450000	450000
25	0.018093	0.0183849	0.0182389	0.00121021	8.90377e-05	792.618	450000	-707.382	0		792.618	450000	792.618	947.061	-45.5776	571.419	571.419	450000	450000	450000	450000	450000
26	0.0183849	0.0186767	0.0185308	0.0013045	9.42925e-05	796.458	450000	-703.542	0		796.458	450000	796.458	949.026	-25.4097	577.399	577.399	450000	450000	450000	450000	450000
27	0.0186767	0.0189686	0.0188226	0.00140424	9.97451e-05	800.298	450000	-699.702	0		800.298	450000	800.298	950.995	-5.5571	583.373	583.373	450000	450000	450000	450000	450000
28	0.0189686	0.0192604	0.0191145	0.00150964	0.000105398	804.138	450000	-695.862	0		804.138	450000	804.138	952.968	13.9901	589.34	589.34	450000	450000	450000	450000	450000
29	0.0192604	0.0195523	0.0194063	0.00162089	0.000111253	807.978	450000	-692.022	0		807.978	450000	807.978	954.945	33.2411	595.301	595.301	450000	450000	450000	450000	450000
30	0.0195523	0.0198441	0.0196982	0.00173821	0.000117313	811.818	450000	-688.182	0		811.818	450000	811.818	956.927	52.2047	601.256	601.256	450000	450000	450000	450000	450000
31	0.0198441	0.0201359	0.01999	0.00186179	0.000123579	815.658	450000	-684.342	0		815.658	450000	815.658	958.912	70.8894	607.204	607.204	450000	450000	450000	450000	450000
32	0.0201359	0.0204278	0.0202819	0.00199184	0.000130054	819.498	450000	-680.502	0		819.498	450000	819.498	960.902	89.3033	613.146	613.146	450000	450000	450000	450000	450000
33	0.0204278	0.0207196	0.0205737	0.00212858	0.00013674	823.338	450000	-676.662	0		823.338	450000	823.338	962.895	107.454	619.082	619.082	450000	450000	450000	450000	450000
34	0.0207196	0.0210115	0.0208656	0.00227222	0.000143638	827.179	450000	-672.821	0		827.179	450000	827.179	964.893	125.349	625.012	625.012	450000	450000	450000	450000	450000
35	0.0210115	0.0213033	0.0211574	0.00242297	0.00015075	831.019	450000	-668.981	0		831.019	450000	831.019	966.895	142.996	630.935	630.935	450000	450000	450000	450000	450000
36	0.0213033	0.0215952	0.0214493	0.00258104	0.000158077	834.859	450000	-665.141	0		834.859	450000	834.859	968.901	160.401	636.852	636.852	450000	450000	450000	450000	450000
37	0.0215952	0.021887	0.0217411	0.00274666	0.00016562	838.699	450000	-661.301	0		838.699	450000	838.699	970.911	177.57	642.762	642.762	450000	450000	450000	450000	450000
38	0.021887	0.0221789	0.022033	0.00292005	0.000173382	842.539	450000	-657.461	0		842.539	450000	842.539	972.925	194.511	648.666	648.666	450000	450000	450000	450000	450000
39	0.0221789	0.0224707	0.0223248	0.00310141	0.000181362	846.379	450000	-653.621	0		846.379	450000	846.379	974.944	211.229	654.564	654.564	450000	450000	450000	450000	450000
40	0.0224707	0.0227626	0.0226167	0.00329097	0.000189562	850.219	450000	-649.781	0		850.219	450000	850.219	976.967	227.729	660.456	660.456	450000	450000	450000	450000	450000
41	0.0227626	0.0230544	0.0229085	0.00348895	0.000197983	854.059	450000	-645.941	0		854.059	450000	854.059	978.993	244.018	666.341	666.341	450000	450000	450000	450000	450000
42	0.0230544	0.0233463	0.0232003	0.00369558	0.000206625	857.899	450000	-642.101	0		857.899	450000	857.899	981.025	260.101	672.22	672.22	450000	450000	450000	450000	450000
43	0.0233463	0.0236381	0.0234922	0.00391107	0.000215489	861.739	450000	-638.261	0		861.739	450000	861.739	983.06	275.983	678.093	678.093	450000	450000	450000	450000	450000
44	0.0236381	0.02393	0.023784	0.00413564	0.000224576	865.579	450000	-634.421	0		865.579	450000	865.579	985.1	291.668	683.959	683.959	450000	450000	450000	450000	450000
45	0.02393	0.0242218	0.0240759	0.00436953	0.000233885	869.42	450000	-630.58	0		869.42	450000	869.42	987.143	307.163	689.819	689.819	450000	450000	450000	450000	450000
46	0.0242218	0.0245137	0.0243677	0.00461294	0.000243417	873.26	450000	-626.74	0		873.26	450000	873.26	989.191	322.47	695.673	695.673	450000	450000	450000	450000	450000
47	0.0245137	0.0248055	0.0246596	0.00486612	0.000253172	877.1	450000	-622.9	0		877.1	450000	877.1	991.244	337.596	701.521	701.521	450000	450000	450000	450000	450000
48	0.0248055	0.0250974	0.0249514	0.00512927	0.000263151	880.94	450000	-619.06	0		880.94	450000	880.94	993.3	352.543	707.362	707.362	450000	450000	450000	450000	450000
49	0.0250974	0.0253892	0.0252433	0.00540262	0.000273352	884.78	450000	-615.22	0		884.78	450000	884.78	995.361	367.317	713.197	713.197	450000	450000	450000	450000	450000
50	0.0253892	0.025681	0.0255351	0.00568639	0.000283775	888.62	450000	-611.38	0		888.62	450000	888.62	997.426	381.921	719.025	719.025	450000	450000	450000	450000	450000
51	0.025681	0.0259729	0.025827	0.00598081	0.000294421	892.46	450000	-607.54	0		892.46	450000	892.46	999.495	396.358	724.847	724.847	450000	450000	450000	450000	450000
52	0.0259729	0.0262647	0.0261188	0.0062861	0.000305288	896.3	450000	-603.7	0		896.3	450000	896.3	1001.57	410.634	730.663	730.663	450000	450000	450000	450000	450000
53	0.0262647	0.0265566	0.0264107	0.00660248	0.000316376	900.14	450000	-599.86	0		900.14	450000	900.14	1003.65	424.751	736.473	736.473	450000	450000	450000	450000	450000
54	0.0265566	0.0268484	0.0267025	0.00693016	0.000327684	903.98	450000	-596.02	0		903.98	450000	903.98	1005.73	438.713	742.276	742.276	450000	450000	450000	450000	450000
55	0.0268484	0.0271403	0.0269944	0.00726937	0.000339212	907.821	450000	-592.179	0		907.821	450000	907.821	1007.82	452.523	748.073	748.073	450000	450000	450000	450000	450000
56	0.0271403	0.0274321	0.0272862	0.00762033	0.000350958	911.661	450000	-588.339	0		911.661	450000	911.661	1009.91	466.184	753.864	753.864	450000	450000	450000	450000	450000
57	0.0274321	0.027724	0.0275781	0.00798325	0.000362921	915.501	450000	-584.499	0		915.501	450000	915.501	1012	479.701	759.648	759.648	450000	450000	450000	450000	450000
58	0.027724	0.0280158	0.0278699	0.00835835	0.0003751	919.341	450000	-580.659	0		919.341	450000	919.341	1014.1	493.074	765.426	765.426	450000	450000	450000	450000	450000
59	0.0280158	0.0283077	0.0281617	0.00874585	0.000387494	923.181	450000	-576.819	0		923.181	450000	923.181	1016.21	506.309	771.198	771.198	450000	450000	450000	450000	450000
60	0.0283077	0.0285995	0.0284536	0.00914595	0.000400101	927.021	450000	-572.979	0		927.021	450000	927.021	1018.31	519.407	776.964	776.964	450000	450000	450000	450000	450000
61	0.0285995	0.0288914	0.0287454	0.00955887	0.00041292	930.861	450000	-569.139	0		930.861	450000	930.861	1020.43	532.372	782.723	782.723	450000	450000	450000	450000	450000
62	0.0288914	0.0291832	0.0290373	0.00998482	0.000425949	934.701	450000	-565.299	0		934.701	450000	934.701	1022.54	545.205	788.475	788.475	450000	450000	450000	450000	450000
63	0.0291832	0.0294751	0.0293291	0.010424	0.000439186	938.541	450000	-561.459	0		938.541	450000	938.541	1024.67	557.91	794.222	794.222	450000	450000	450000	450000	450000
64	0.0294751	0.0297669	0.029621	0.0108766	0.00045263	942.381	450000	-557.619	0		942.381	450000	942.381	1026.79	570.49	799.962	799.962	450000	450000	450000	450000	450000
65	0.0297669	0.0300588	0.0299128	0.0113429	0.000466279	946.221	450000	-553.779	0		946.221	450000	946.221	1028.92	582.946	805.696	805.696	450000	450000	450000	450000	450000
66	0.0300588	0.0303506	0.0302047	0.011823	0.00048013	950.062	450000	-549.938	0		950.062	450000	950.062	1031.06	595.281	811.424	811.424	450000	450000	450000	450000	450000
67	0.0303506	0.0306425	0.0304965	0.0123172	0.000494181	953.902	450000	-546.098	0		953.902	450000	953.902	1033.2	607.497	817.145	817.145	450000	450000	450000	450000	450000
68	0.0306425	0.0309343	0.0307884	0.0128257	0.000508431	957.742	450000	-542.258	0		957.742	450000	957.742	1035.34	619.597	822.86	822.86	450000	450000	450000	450000	450000
69	0.0309343	0.0312261	0.0310802	0.0133485	0.000522877	961.582	450000	-538.418	0		961.582	450000	961.582	1037.49	631.583	828.569	828.569	450000	450000	450000	450000	450000
70	0.0312261	0.031518	0.0313721	0.013886	0.000537516	965.422	450000	-534.578	0		965.422	450000	965.422	1039.64	643.457	834.271	834.271	450000	450000	450000	450000	450000
71	0.031518	0.0318098	0.0316639	0.0144384	0.000552347	969.262	450000	-530.738	0		969.262	450000	969.262	1041.8	655.221	839.967	839.967	450000	450000	450000	450000	450000
72	0.0318098	0.0321017	0.0319558	0.0150058	0.000567366	973.102	450000	-526.898	0		973.102	450000	973.102	1043.96	666.877	845.657	845.657	450000	450000	450000	450000	450000
73	0.0321017	0.0323935	0.0322476	0.0155883	0.00058257	976.942	450000	-523.058	0		976.942	450000	976.942	1046.12	678.427	851.34	851.34	450000	450000	450000	450000	450000
74	0.0323935	0.0326854	0.0325395	0.0161863	0.000597958	980.782	450000	-519.218	0		980.782	450000	980.782	1048.29	689.874	857.017	857.017	450000	450000	450000	450000	450000
75	0.0326854	0.0329772	0.0328313	0.0167998	0.000613527	984.622	450000	-515.378	0		984.622	450000	984.622	1050.47	701.217	862.688	862.688	450000	450000	450000	450000	450000
76	0.0329772	0.0332691	0.0331232	0.0174291	0.000629273	988.463	450000	-511.537	0		988.463	450000	988.463	1052.65	712.461	868.352	868.352	450000	450000	450000	450000	450000
77	0.0332691	0.0335609	0.033415	0.0180743	0.000645193	992.303	450000	-507.697	0		992.303	450000	992.303	1054.83	723.606	874.011	874.011	450000	450000	450000	450000	450000
78	0.0335609	0.0338528	0.0337068	0.0187356	0.000661285	996.143	450000	-503.857	0		996.143	450000	996.143	1057.02	734.653	879.663	879.663	450000	450000	450000	450000	450000
79	0.0338528	0.0341446	0.0339987	0.0194131	0.000677545	999.983	450000	-500.017	0		999.983	450000	999.983	1059.21	745.606	885.308	885.308	450000	450000	450000	450000	450000
80	0.0341446	0.0344365	0.0342905	0.0201071	0.000693971	1003.82	450000	-496.177	0		1003.82	450000	1003.82	1061.41	756.465	890.947	890.947	450000	450000	450000	450000	450000
81	0.0344365	0.0347283	0.0345824	0.0208176	0.000710559	1007.66	450000	-492.337	0		1007.66	450000	1007.66	1063.61	767.232	896.58	896.58	450000	450000	450000	450000	450000
82	0.0347283	0.0350202	0.0348742	0.0215449	0.000727305	1011.5	450000	-488.497	0		1011.5	450000	1011.5	1065.82	777.909	902.207	902.207	450000	450000	450000	450000	450000
83	0.0350202	0.035312	0.0351661	0.0222892	0.000744207	1015.34	450000	-484.657	0		1015.34	450000	1015.34	1068.03	788.496	907.827	907.827	450000	450000	450000	450000	450000
84	0.035312	0.0356039	0.0354579	0.0230504	0.000761262	1019.18	450000	-480.817	0		1019.18	450000	1019.18	1070.25	798.996	913.441	913.441	450000	450000	450000	450000	450000
85	0.0356039	0.0358957	0.0357498	0.0238289	0.000778465	1023.02	450000	-476.977	0		1023.02	450000	1023.02	1072.47	809.41	919.049	919.049	450000	450000	450000	450000	450000
86	0.0358957	0.0361875	0.0360416	0.0246247	0.000795813	1026.86	450000	-473.137	0		1026.86	450000	1026.86	1074.69	819.739	924.65	924.65	450000	450000	450000	450000	450000
87	0.0361875	0.0364794	0.0363335	0.025438	0.000813302	1030.7	450000	-469.296	0		1030.7	450000	1030.7	1076.92	829.985	930.245	930.245	450000	450000	450000	450000	450000
88	0.0364794	0.0367712	0.0366253	0.0262689	0.00083093	1034.54	450000	-465.456	0		1034.54	450000	1034.54	1079.16	840.149	935.834	935.834	450000	450000	450000	450000	450000
89	0.0367712	0.0370631	0.0369172	0.0271176	0.000848692	1038.38	450000	-461.616	0		1038.38	450000	1038.38	1081.4	850.233	941.417	941.417	450000	450000	450000	450000	450000
90	0.0370631	0.0373549	0.037209	0.0279842	0.000866585	1042.22	450000	-457.776	0		1042.22	450000	1042.22	1083.64	860.237	946.993	946.993	450000	450000	450000	450000	450000
91	0.0373549	0.0376468	0.0375009	0.0288688	0.000884605	1046.06	450000	-453.936	0		1046.06	450000	1046.06	1085.89	870.162	952.563	952.563	450000	450000	450000	450000	450000
92	0.0376468	0.0379386	0.0377927	0.0297716	0.000902748	1049.9	450000	-450.096	0		1049.9	450000	1049.9	1088.14	880.011	958.126	958.126	450000	450000	450000	450000	450000
93	0.0379386	0.0382305	0.0380846	0.0306926	0.00092101	1053.74	450000	-446.256	0		1053.74	450000	1053.74	1090.4	889.784	963.684	963.684	450000	450000	450000	450000	450000
94	0.0382305	0.0385223	0.0383764	0.031632	0.000939388	1057.58	450000	-442.416	0		1057.58	450000	1057.58	1092.66	899.483	969.234	969.234	450000	450000	450000	450000	450000
95	0.0385223	0.0388142	0.0386683	0.0325898	0.000957878	1061.42	450000	-438.576	0		1061.42	450000	1061.42	1094.93	909.108	974.779	974.779	450000	450000	450000	450000	450000
96	0.0388142	0.039106	0.0389601	0.0335663	0.000976476	1065.26	450000	-434.736	0		1065.26	450000	1065.26	1097.2	918.66	980.317	980.317	450000	450000	450000	450000	450000
97	0.039106	0.0393979	0.0392519	0.0345615	0.000995177	1069.1	450000	-430.895	0		1069.1	450000	1069.1	1099.48	928.142	985.849	985.849	450000	450000	450000	450000	450000
98	0.0393979	0.0396897	0.0395438	0.0355755	0.00101398	1072.94	450000	-427.055	0		1072.94	450000	1072.94	1101.76	937.553	991.375	991.375	450000	450000	450000	450000	450000
99	0.0396897	0.0399816	0.0398356	0.0366083	0.00103288	1076.78	450000	-423.215	0		1076.78	450000	1076.78	1104.04	946.895	996.894	996.894	450000	450000	450000	450000	450000
100	0.0399816	0.0402734	0.0401275	0.0376602	0.00105187	1080.62	450000	-419.375	0		1080.62	450000	1080.62	1106.33	956.168	1002.41	1002.41	450000	450000	450000	450000	450000
101	0.0402734	0.0405653	0.0404193	0.0387311	0.00107094	1084.46	450000	-415.535	0		1084.46	450000	1084.46	1108.63	965.375	1007.91	1007.91	450000	450000	450000	450000	450000
102	0.0405653	0.0408571	0.0407112	0.0398213	0.0010901	1088.31	450000	-411.695	0		1088.31	450000	1088.31	1110.93	974.515	1013.41	1013.41	450000	450000	450000	450000	450000
103	0.0408571	0.041149	0.041003	0.0409306	0.00110934	1092.15	450000	-407.855	0		1092.15	450000	1092.15	1113.23	983.59	1018.91	1018.91	450000	450000	450000	450000	450000
104	0.041149	0.0414408	0.0412949	0.0420593	0.00112866	1095.99	450000	-404.015	0		1095.99	450000	1095.99	1115.54	992.6	1024.4	1024.4	450000	450000	450000	450000	450000
105	0.0414408	0.0417326	0.0415867	0.0432073	0.00114805	1099.83	450000	-400.175	0		1099.83	450000	1099.83	1117.86	1001.55	1029.88	1029.88	450000	450000	450000	450000	450000
106	0.0417326	0.0420245	0.0418786	0.0443748	0.0011675	1103.67	450000	-396.335	0		1103.67	450000	1103.67	1120.18	1010.43	1035.35	1035.35	450000	450000	450000	450000	450000
107	0.0420245	0.0423163	0.0421704	0.0455618	0.00118702	1107.51	450000	-392.495	0		1107.51	450000	1107.51	1122.5	1019.25	1040.82	1040.82	450000	450000	450000	450000	450000
108	0.0423163	0.0426082	0.0424623	0.0467684	0.0012066	1111.35	450000	-388.654	0		1111.35	450000	1111.35	1124.83	1028.02	1046.28	1046.28	450000	450000	450000	450000	450000
109	0.0426082	0.0429	0.0427541	0.0479947	0.00122624	1115.19	450000	-384.814	0		1115.19	450000	1115.19	1127.16	1036.72	1051.74	1051.74	450000	450000	450000	450000	450000
110	0.0429	0.0431919	0.043046	0.0492406	0.00124592	1119.03	450000	-380.974	0		1119.03	450000	1119.03	1129.5	1045.36	1057.19	1057.19	450000	450000	450000	450000	450000
111	0.0431919	0.0434837	0.0433378	0.0505062	0.00126565	1122.87	450000	-377.134	0		1122.87	450000	1122.87	1131.85	1053.95	1062.63	1062.63	450000	450000	450000	450000	450000
112	0.0434837	0.0437756	0.0436297	0.0517917	0.00128543	1126.71	450000	-373.294	0		1126.71	450000	1126.71	1134.19	1062.47	1068.07	1068.07	450000	450000	450000	450000	450000
113	0.0437756	0.0440674	0.0439215	0.0530969	0.00130524	1130.55	450000	-369.454	0		1130.55	450000	1130.55	1136.55	1070.94	1073.5	1073.5	450000	450000	450000	450000	450000
114	0.0440674	0.0443593	0.0442133	0.054422	0.00132509	1134.39	450000	-365.614	0		1134.39	450000	1134.39	1138.9	1079.36	1078.93	1078.93	450000	450000	450000	450000	450000
115	0.0443593	0.0446511	0.0445052	0.055767	0.00134497	1138.23	450000	-361.774	0		1138.23	450000	1138.23	1141.27	1087.72	1084.35	1084.35	450000	450000	450000	450000	450000
116	0.0446511	0.044943	0.044797	0.0571319	0.00136487	1142.07	450000	-357.934	0		1142.07	450000	1142.07	1143.64	1096.02	1089.76	1089.76	450000	450000	450000	450000	450000
117	0.044943	0.0452348	0.0450889	0.0585167	0.0013848	1145.91	450000	-354.094	0		1145.91	450000	1145.91	1146.01	1104.27	1095.16	1095.16	450000	450000	450000	450000	450000
118	0.0452348	0.0455267	0.0453807	0.0599214	0.00140475	1149.75	450000	-350.253	0		1149.75	450000	1149.75	1148.39	1112.47	1100.56	1100.56	450000	450000	450000	450000	450000
119	0.0455267	0.0458185	0.0456726	0.0613461	0.00142471	1153.59	450000	-346.413	0		1153.59	450000	1153.59	1150.77	1120.61	1105.96	1105.96	450000	450000	450000	450000	450000
120	0.0458185	0.0461104	0.0459644	0.0627908	0.00144468	1157.43	450000	-342.573	0		1157.43	450000	1157.43	1153.16	1128.7	1111.34	1111.34	450000	450000	450000	450000	450000
121	0.0461104	0.0464022	0.0462563	0.0642554	0.00146465	1161.27	450000	-338.733	0		1161.27	450000	1161.27	1155.55	1136.74	1116.72	1116.72	450000	450000	450000	450000	450000
122	0.0464022	0.046694	0.0465481	0.0657401	0.00148463	1165.11	450000	-334.893	0		1165.11	450000	1165.11	1157.95	1144.73	1122.1	1122.1	450000	450000	450000	450000	450000
123	0.046694	0.0469859	0.04684	0.0672447	0.00150461	1168.95	450000	-331.053	0		1168.95	450000	1168.95	1160.35	1152.67	1127.47	1127.47	450000	450000	450000	450000	450000
124	0.0469859	0.0472777	0.0471318	0.0687693	0.00152458	1172.79	450000	-327.213	0		1172.79	450000	1172.79	1162.76	1160.57	1132.83	1132.83	450000	450000	450000	450000	450000
125	0.0472777	0.0475696	0.0474237	0.0703138	0.00154454	1176.63	450000	-323.373	0		1176.63	450000	1176.63	1165.17	1168.41	1138.18	1138.18	450000	450000	450000	450000	450000
126	0.0475696	0.0478614	0.0477155	0.0718783	0.00156448	1180.47	450000	-319.533	0		1180.47	450000	1180.47	1167.59	1176.2	1143.53	1143.53	450000	450000	450000	450000	450000
127	0.0478614	0.0481533	0.0480074	0.0734627	0.00158441	1184.31	450000	-315.693	0		1184.31	450000	1184.31	1170.01	1183.95	1148.88	1148.88	450000	450000	450000	450000	450000
128	0.0481533	0.0484451	0.0482992	0.075067	0.00160432	1188.15	450000	-311.853	0		1188.15	450000	1188.15	1172.43	1191.65	1154.21	1154.21	450000	450000	450000	450000	450000
129	0.0484451	0.048737	0.0485911	0.0766912	0.0016242	1191.99	450000	-308.012	0		1191.99	450000	1191.99	1174.87	1199.3	1159.54	1159.54	450000	450000	450000	450000	450000
130	0.048737	0.0490288	0.0488829	0.0783352	0.00164405	1195.83	450000	-304.172	0		1195.83	450000	1195.83	1177.3	1206.91	1164.87	1164.87	450000	450000	450000	450000	450000
131	0.0490288	0.0493207	0.0491748	0.0799991	0.00166386	1199.67	450000	-300.332	0		1199.67	450000	1199.67	1179.75	1214.47	1170.18	1170.18	450000	450000	450000	450000	450000
132	0.0493207	0.0496125	0.0494666	0.0816828	0.00168364	1203.51	450000	-296.492	0		1203.51	450000	1203.51	1182.2	1221.99	1175.49	1175.49	450000	450000	450000	450000	450000
133	0.0496125	0.0499044	0.0497584	0.0833861	0.00170338	1207.35	450000	-292.652	0		1207.35	450000	1207.35	1184.65	1229.46	1180.8	1180.8	450000	450000	450000	450000	450000
134	0.0499044	0.0501962	0.0500503	0.0851092	0.00172308	1211.19	450000	-288.812	0		1211.19	450000	1211.19	1187.11	1236.89	1186.1	1186.1	450000	450000	450000	450000	450000
135	0.0501962	0.0504881	0.0503421	0.0868519	0.00174272	1215.03	450000	-284.972	0		1215.03	450000	1215.03	1189.57	1244.28	1191.39	1191.39	450000	450000	450000	450000	450000
136	0.0504881	0.0507799	0.050634	0.0886143	0.00176232	1218.87	450000	-281.132	0		1218.87	450000	1218.87	1192.04	1251.62	1196.68	1196.68	450000	450000	450000	450000	450000
137	0.0507799	0.0510718	0.0509258	0.0903961	0.00178186	1222.71	450000	-277.292	0		1222.71	450000	1222.71	1194.51	1258.93	1201.96	1201.96	450000	450000	450000	450000	450000
138	0.0510718	0.0513636	0.0512177	0.0921974	0.00180133	1226.55	450000	-273.452	0		1226.55	450000	1226.55	1196.99	1266.19	1207.23	1207.23	450000	450000	450000	450000	450000
139	0.0513636	0.0516555	0.0515095	0.0940182	0.00182075	1230.39	450000	-269.611	0		1230.39	450000	1230.39	1199.47	1273.4	1212.5	1212.5	450000	450000	450000	450000	450000
140	0.0516555	0.0519473	0.0518014	0.0958583	0.0018401	1234.23	450000	-265.771	0		1234.23	450000	1234.23	1201.96	1280.58	1217.76	1217.76	450000	450000	450000	450000	450000
141	0.0519473	0.0522391	0.0520932	0.0977177	0.00185938	1238.07	450000	-261.931	0		1238.07	450000	1238.07	1204.45	1287.72	1223.01	1223.01	450000	450000	450000	450000	450000
142	0.0522391	0.052531	0.0523851	0.0995963	0.00187858	1241.91	450000	-258.091	0		1241.91	450000	1241.91	1206.95	1294.82	1228.26	1228.26	450000	450000	450000	450000	450000
143	0.052531	0.0528228	0.0526769	0.101494	0.00189771	1245.75	450000	-254.251	0		1245.75	450000	1245.75	1209.46	1301.88	1233.5	1233.5	450000	450000	450000	450000	450000
144	0.0528228	0.0531147	0.0529688	0.103411	0.00191676	1249.59	450000	-250.411	0		1249.59	450000	1249.59	1211.97	1308.89	1238.74	1238.74	450000	450000	450000	450000	450000
145	0.0531147	0.0534065	0.0532606	0.105346	0.00193573	1253.43	450000	-246.571	0		1253.43	450000	1253.43	1214.48	1315.88	1243.97	1243.97	450000	450000	450000	450000	450000
146	0.0534065	0.0536984	0.0535525	0.107301	0.0019546	1257.27	450000	-242.731	0		1257.27	450000	1257.27	1217	1322.82	1249.19	1249.19	450000	450000	450000	450000	450000
147	0.0536984	0.0539902	0.0538443	0.109274	0.00197339	1261.11	450000	-238.891	0		1261.11	450000	1261.11	1219.53	1329.72	1254.4	1254.4	450000	450000	450000	450000	450000
148	0.0539902	0.0542821	0.0541362	0.111267	0.00199208	1264.95	450000	-235.051	0		1264.95	450000	1264.95	1222.06	1336.59	1259.62	1259.62	450000	450000	450000	450000	450000
149	0.0542821	0.0545739	0.054428	0.113277	0.00201068	1268.79	450000	-231.21	0		1268.79	450000	1268.79	1224.59	1343.42	1264.82	1264.82	450000	450000	450000	450000	450000
150	0.0545739	0.0548658	0.0547198	0.115306	0.00202918	1272.63	450000	-227.37	0		1272.63	450000	1272.63	1227.13	1350.21	1270.02	1270.02	450000	450000	450000	450000	450000
151	0.0548658	0.0551576	0.0550117	0.117354	0.00204757	1276.47	450000	-223.53	0		1276.47	450000	1276.47	1229.68	1356.97	1275.21	1275.21	450000	450000	450000	450000	450000
152	0.0551576	0.0554495	0.0553035	0.11942	0.00206586	1280.31	450000	-219.69	0		1280.31	450000	1280.31	1232.23	1363.69	1280.39	1280.39	450000	450000	450000	450000	450000
153	0.0554495	0.0557413	0.0555954	0.121504	0.00208404	1284.15	450000	-215.85	0		1284.15	450000	1284.15	1234.78	1370.38	1285.57	1285.57	450000	450000	450000	450000	450000
154	0.0557413	0.0560332	0.0558872	0.123606	0.00210211	1287.99	450000	-212.01	0		1287.99	450000	1287.99	1237.35	1377.03	1290.74	1290.74	450000	450000	450000	450000	450000
155	0.0560332	0.056325	0.0561791	0.125726	0.00212006	1291.83	450000	-208.17	0		1291.83	450000	1291.83	1239.91	1383.65	1295.91	1295.91	450000	450000	450000	450000	450000
156	0.056325	0.0566169	0.0564709	0.127864	0.00213789	1295.67	450000	-204.33	0		1295.67	450000	1295.67	1242.49	1390.23	1301.07	1301.07	450000	450000	450000	450000	450000
157	0.0566169	0.0569087	0.0567628	0.13002	0.00215561	1299.51	450000	-200.49	0		1299.51	450000	1299.51	1245.06	1396.78	1306.22	1306.22	450000	450000	450000	450000	450000
158	0.0569087	0.0572006	0.0570546	0.132193	0.0021732	1303.35	450000	-196.65	0		1303.35	450000	1303.35	1247.65	1403.3	1311.37	1311.37	450000	450000	450000	450000	450000
159	0.0572006	0.0574924	0.0573465	0.134383	0.00219066	1307.19	450000	-192.81	0		1307.19	450000	1307.19	1250.24	1409.78	1316.51	1316.51	450000	450000	450000	450000	450000
160	0.0574924	0.0577842	0.0576383	0.136591	0.002208	1311.03	450000	-188.969	0		1311.03	450000	1311.03	1252.83	1416.23	1321.65	1321.65	450000	450000	450000	450000	450000
161	0.0577842	0.0580761	0.0579302	0.138817	0.00222521	1314.87	450000	-185.129	0		1314.87	450000	1314.87	1255.43	1422.64	1326.77	1326.77	450000	450000	450000	450000	450000
162	0.0580761	0.0583679	0.058222	0.141059	0.00224228	1318.71	450000	-181.289	0		1318.71	450000	1318.71	1258.03	1429.03	1331.9	1331.9	450000	450000	450000	450000	450000
163	0.0583679	0.0586598	0.0585139	0.143318	0.00225921	1322.55	450000	-177.449	0		1322.55	450000	1322.55	1260.64	1435.38	1337.01	1337.01	450000	450000	450000	450000	450000
164	0.0586598	0.0589516	0.0588057	0.145594	0.00227601	1326.39	450000	-173.609	0		1326.39	450000	1326.39	1263.26	1441.7	1342.12	1342.12	450000	450000	450000	450000	450000
165	0.0589516	0.0592435	0.0590976	0.147887	0.00229266	1330.23	450000	-169.769	0		1330.23	450000	1330.23	1265.88	1447.99	1347.22	1347.22	450000	450000	450000	450000	450000
166	0.0592435	0.0595353	0.0593894	0.150196	0.00230917	1334.07	450000	-165.929	0		1334.07	450000	1334.07	1268.51	1454.25	1352.32	1352.32	450000	450000	450000	450000	450000
167	0.0595353	0.0598272	0.0596813	0.152521	0.00232553	1337.91	450000	-162.089	0		1337.91	450000	1337.91	1271.14	1460.48	1357.41	1357.41	450000	450000	450000	450000	450000
168	0.0598272	0.060119	0.0599731	0.154863	0.00234175	1341.75	450000	-158.249	0		1341.75	450000	1341.75	1273.78	1466.68	1362.49	1362.49	450000	450000	450000	450000	450000
169	0.060119	0.0604109	0.0602649	0.157221	0.00235781	1345.59	450000	-154.409	0		1345.59	450000	1345.59	1276.42	1472.84	1367.57	1367.57	450000	450000	450000	450000	450000
170	0.0604109	0.0607027	0.0605568	0.159595	0.00237373	1349.43	450000	-150.568	0		1349.43	450000	1349.43	1279.07	1478.98	1372.64	1372.64	450000	450000	450000	450000	450000
171	0.0607027	0.0609946	0.0608486	0.161984	0.00238948	1353.27	450000	-146.728	0		1353.27	450000	1353.27	1281.72	1485.09	1377.71	1377.71	450000	450000	450000	450000	450000
172	0.0609946	0.0612864	0.0611405	0.164389	0.00240508	1357.11	450000	-142.888	0		1357.11	450000	1357.11	1284.38	1491.17	1382.77	1382.77	450000	450000	450000	450000	450000
173	0.0612864	0.0615783	0.0614323	0.16681	0.00242052	1360.95	450000	-139.048	0		1360.95	450000	1360.95	1287.04	1497.22	1387.82	1387.82	450000	450000	450000	450000	450000
174	0.0615783	0.0618701	0.0617242	0.169246	0.0024358	1364.79	450000	-135.208	0		1364.79	450000	1364.79	1289.71	1503.24	1392.87	1392.87	450000	450000	450000	450000	450000
175	0.0618701	0.062162	0.062016	0.171697	0.00245092	1368.63	450000	-131.368	0		1368.63	450000	1368.63	1292.39	1509.23	1397.91	1397.91	450000	450000	450000	450000	450000
176	0.062162	0.0624538	0.0623079	0.174162	0.00246587	1372.47	450000	-127.528	0		1372.47	450000	1372.47	1295.07	1515.2	1402.94	1402.94	450000	450000	450000	450000	450000
177	0.0624538	0.0627456	0.0625997	0.176643	0.00248066	1376.31	450000	-123.688	0		1376.31	450000	1376.31	1297.76	1521.13	1407.97	1407.97	450000	450000	450000	450000	450000
178	0.0627456	0.0630375	0.0628916	0.179138	0.00249527	1380.15	450000	-119.848	0		1380.15	450000	1380.15	1300.45	1527.04	1412.99	1412.99	450000	450000	450000	450000	450000
179	0.0630375	0.0633293	0.0631834	0.181648	0.00250972	1383.99	450000	-116.008	0		1383.99	450000	1383.99	1303.15	1532.92	1418	1418	450000	450000	450000	450000	450000
180	0.0633293	0.0636212	0.0634753	0.184172	0.00252399	1387.83	450000	-112.168	0		1387.83	450000	1387.83	1305.85	1538.78	1423.01	1423.01	450000	450000	450000	450000	450000
181	0.0636212	0.063913	0.0637671	0.18671	0.00253809	1391.67	450000	-108.327	0		1391.67	450000	1391.67	1308.56	1544.61	1428.01	1428.01	450000	450000	450000	450000	450000
182	0.063913	0.0642049	0.064059	0.189262	0.00255202	1395.51	450000	-104.487	0		1395.51	450000	1395.51	1311.28	1550.41	1433.01	1433.01	450000	450000	450000	450000	450000
183	0.0642049	0.0644967	0.0643508	0.191828	0.00256577	1399.35	450000	-100.647	0		1399.35	450000	1399.35	1314	1556.18	1438	1438	450000	450000	450000	450000	450000
184	0.0644967	0.0647886	0.0646427	0.194407	0.00257934	1403.19	450000	-96.8072	0		1403.19	450000	1403.19	1316.72	1561.93	1442.98	1442.98	450000	450000	450000	450000	450000
185	0.0647886	0.0650804	0.0649345	0.197	0.00259273	1407.03	450000	-92.9671	0		1407.03	450000	1407.03	1319.46	1567.65	1447.96	1447.96	450000	450000	450000	450000	450000
186	0.0650804	0.0653723	0.0652264	0.199606	0.00260594	1410.87	450000	-89.127	0		1410.87	450000	1410.87	1322.19	1573.35	1452.93	1452.93	450000	450000	450000	450000	450000
187	0.0653723	0.0656641	0.0655182	0.202225	0.00261896	1414.71	450000	-85.2869	0		1414.71	450000	1414.71	1324.94	1579.02	1457.89	1457.89	450000	450000	450000	450000	450000
188	0.0656641	0.065956	0.06581	0.204857	0.00263181	1418.55	450000	-81.4468	0		1418.55	450000	1418.55	1327.68	1584.67	1462.85	1462.85	450000	450000	450000	450000	450000
189	0.065956	0.0662478	0.0661019	0.207501	0.00264446	1422.39	450000	-77.6067	0		1422.39	450000	1422.39	1330.44	1590.29	1467.8	1467.8	450000	450000	450000	450000	450000
190	0.0662478	0.0665397	0.0663937	0.210158	0.00265694	1426.23	450000	-73.7666	0		1426.23	450000	1426.23	1333.2	1595.89	1472.75	1472.75	450000	450000	450000	450000	450000
191	0.0665397	0.0668315	0.0666856	0.212827	0.00266922	1430.07	450000	-69.9265	0		1430.07	450000	1430.07	1335.97	1601.46	1477.69	1477.69	450000	450000	450000	450000	450000
192	0.0668315	0.0671234	0.0669774	0.215509	0.00268132	1433.91	450000	-66.0864	0		1433.91	450000	1433.91	1338.74	1607.01	1482.62	1482.62	450000	450000	450000	450000	450000
193	0.0671234	0.0674152	0.0672693	0.218202	0.00269322	1437.75	450000	-62.2463	0		1437.75	450000	1437.75	1341.51	1612.53	1487.55	1487.55	450000	450000	450000	450000	450000
194	0.0674152	0.0677071	0.0675611	0.220907	0.00270494	1441.59	450000	-58.4062	0		1441.59	450000	1441.59	1344.3	1618.03	1492.47	1492.47	450000	450000	450000	450000	450000
195	0.0677071	0.0679989	0.067853	0.223623	0.00271647	1445.43	450000	-54.5661	0		1445.43	450000	1445.43	1347.09	1623.51	1497.38	1497.38	450000	450000	450000	450000	450000
196	0.0679989	0.0682907	0.0681448	0.226351	0.0027278	1449.27	450000	-50.726	0		1449.27	450000	1449.27	1349.88	1628.96	1502.29	1502.29	450000	450000	450000	450000	450000
197	0.0682907	0.0685826	0.0684367	0.22909	0.00273894	1453.11	450000	-46.8859	0		1453.11	450000	1453.11	1352.68	1634.39	1507.19	1507.19	450000	450000	450000	450000	450000
198	0.0685826	0.0688744	0.0687285	0.23184	0.00274989	1456.95	450000	-43.0458	0		1456.95	450000	1456.95	1355.49	1639.8	1512.08	1512.08	450000	450000	450000	450000	450000
199	0.0688744	0.0691663	0.0690204	0.234601	0.00276064	1460.79	450000	-39.2057	0		1460.79	450000	1460.79	1358.3	1645.18	1516.97	1516.97	450000	450000	450000	450000	450000
200	0.0691663	0.0694581	0.0693122	0.237372	0.00277119	1464.63	450000	-35.3656	0		1464.63	450000	1464.63	1361.12	1650.54	1521.85	1521.85	450000	450000	450000	450000	450000
201	0.0694581	0.06975	0.0696041	0.240153	0.00278155	1468.47	450000	-31.5255	0		1468.47	450000	1468.47	1363.94	1655.88	1526.73	1526.73	450000	450000	450000	450000	450000
202	0.06975	0.0700418	0.0698959	0.242945	0.00279171	1472.31	450000	-27.6854	0		1472.31	450000	1472.31	1366.77	1661.19	1531.6	1531.6	450000	450000	450000	450000	450000
203	0.0700418	0.0703337	0.0701878	0.245747	0.00280168	1476.15	450000	-23.8453	0		1476.15	450000	1476.15	1369.61	1666.49	1536.46	1536.46	450000	450000	450000	450000	450000
204	0.0703337	0.0706255	0.0704796	0.248558	0.00281145	1479.99	450000	-20.0052	0		1479.99	450000	1479.99	1372.45	1671.76	1541.32	1541.32	450000	450000	450000	450000	450000
205	0.0706255	0.0709174	0.0707714	0.251379	0.00282102	1483.83	450000	-16.1652	0		1483.83	450000	1483.83	1375.3	1677.01	1546.17	1546.17	450000	450000	450000	450000	450000
206	0.0709174	0.0712092	0.0710633	0.25421	0.00283039	1487.67	450000	-12.3251	0		1487.67	450000	1487.67	1378.15	1682.24	1551.01	1551.01	450000	450000	450000	450000	450000
207	0.0712092	0.0715011	0.0713551	0.257049	0.00283956	1491.52	450000	-8.48496	0		1491.52	450000	1491.52	1381.01	1687.44	1555.85	1555.85	450000	450000	450000	450000	450000
208	0.0715011	0.0717929	0.071647	0.259898	0.00284853	1495.36	450000	-4.64486	0		1495.36	450000	1495.36	1383.88	1692.63	1560.68	1560.68	450000	450000	450000	450000	450000
209	0.0717929	0.0720848	0.0719388	0.262755	0.0028573	1499.2	450000	-0.804769	0		1499.2	450000	1499.2	1386.75	1697.79	1565.51	1565.51	450000	450000	450000	450000	450000
210	0.0720848	0.0723766	0.0722307	0.265621	0.00286587	1503.04	450000	3.03533	3.03533		1503.04	450000	1503.04	1389.62	1702.94	1570.33	1570.33	450000	450000	450000	450000	450000
211	0.0723766	0.0726685	0.0725225	0.268495	0.00287424	1506.88	450000	6.87542	6.87542		1506.88	450000	1506.88	1392.51	1708.06	1575.14	1575.14	450000	450000	450000	450000	450000
212	0.0726685	0.0729603	0.0728144	0.271377	0.00288241	1510.72	450000	10.7155	10.7155		1510.72	450000	1510.72	1395.4	1713.16	1579.95	1579.95	450000	450000	450000	450000	450000
213	0.0729603	0.0732522	0.0731062	0.274268	0.00289038	1514.56	450000	14.5556	14.5556		1514.56	450000	1514.56	1398.29	1718.24	1584.75	1584.75	450000	450000	450000	450000	450000
214	0.0732522	0.073544	0.0733981	0.277166	0.00289815	1518.4	450000	18.3957	18.3957		1518.4	450000	1518.4	1401.19	1723.31	1589.54	1589.54	450000	450000	450000	450000	450000
215	0.073544	0.0738358	0.0736899	0.280072	0.00290572	1522.24	450000	22.2358	22.2358		1522.24	450000	1522.24	1404.1	1728.35	1594.33	1594.33	450000	450000	450000	450000	450000
216	0.0738358	0.0741277	0.0739818	0.282985	0.00291309	1526.08	450000	26.0759	26.0759		1526.08	450000	1526.08	1407.01	1733.37	1599.11	1599.11	450000	450000	450000	450000	450000
217	0.0741277	0.0744195	0.0742736	0.285905	0.00292025	1529.92	450000	29.916	29.916		1529.92	450000	1529.92	1409.93	1738.37	1603.88	1603.88	450000	450000	450000	450000	450000
218	0.0744195	0.0747114	0.0745655	0.288832	0.00292721	1533.76	450000	33.7561	33.7561		1533.76	450000	1533.76	1412.86	1743.35	1608.65	1608.65	450000	450000	450000	450000	450000
219	0.0747114	0.0750032	0.0748573	0.291766	0.00293398	1537.6	450000	37.5962	37.5962		1537.6	450000	1537.6	1415.79	1748.32	1613.41	1613.41	450000	450000	450000	450000	450000
220	0.0750032	0.0752951	0.0751492	0.294707	0.00294054	1541.44	450000	41.4363	41.4363		1541.44	450000	1541.44	1418.73	1753.26	1618.17	1618.17	450000	450000	450000	450000	450000
221	0.0752951	0.0755869	0.075441	0.297654	0.0029469	1545.28	450000	45.2764	45.2764		1545.28	450000	1545.28	1421.67	1758.18	1622.92	1622.92	450000	450000	450000	450000	450000
222	0.0755869	0.0758788	0.0757329	0.300607	0.00295306	1549.12	450000	49.1165	49.1165		1549.12	450000	1549.12	1424.62	1763.09	1627.66	1627.66	450000	450000	450000	450000	450000
223	0.0758788	0.0761706	0.0760247	0.303566	0.00295902	1552.96	450000	52.9566	52.9566		1552.96	450000	1552.96	1427.57	1767.98	1632.4	1632.4	450000	450000	450000	450000	450000
224	0.0761706	0.0764625	0.0763165	0.306531	0.00296478	1556.8	450000	56.7967	56.7967		1556.8	450000	1556.8	1430.54	1772.84	1637.13	1637.13	450000	450000	450000	450000	450000
225	0.0764625	0.0767543	0.0766084	0.309501	0.00297034	1560.64	450000	60.6368	60.6368		1560.64	450000	1560.64	1433.5	1777.69	1641.86	1641.86	450000	450000	450000	450000	450000
226	0.0767543	0.0770462	0.0769002	0.312477	0.0029757	1564.48	450000	64.4769	64.4769		1564.48	450000	1564.48	1436.48	1782.52	1646.57	1646.57	450000	450000	450000	450000	450000
227	0.0770462	0.077338	0.0771921	0.315457	0.00298087	1568.32	450000	68.3169	68.3169		1568.32	450000	1568.32	1439.46	1787.34	1651.29	1651.29	450000	450000	450000	450000	450000
228	0.077338	0.0776299	0.0774839	0.318443	0.00298583	1572.16	450000	72.157	72.157		1572.16	450000	1572.16	1442.44	1792.13	1655.99	1655.99	450000	450000	450000	450000	450000
229	0.0776299	0.0779217	0.0777758	0.321434	0.00299059	1576	450000	75.9971	75.9971		1576	450000	1576	1445.44	1796.91	1660.69	1660.69	450000	450000	450000	450000	450000
230	0.0779217	0.0782136	0.0780676	0.324429	0.00299516	1579.84	450000	79.8372	79.8372		1579.84	450000	1579.84	1448.44	1801.66	1665.38	1665.38	450000	450000	450000	450000	450000
231	0.0782136	0.0785054	0.0783595	0.327429	0.00299953	1583.68	450000	83.6773	83.6773		1583.68	450000	1583.68	1451.44	1806.4	1670.07	1670.07	450000	450000	450000	450000	450000
232	0.0785054	0.0787972	0.0786513	0.330432	0.0030037	1587.52	450000	87.5174	87.5174		1587.52	450000	1587.52	1454.45	1811.13	1674.75	1674.75	450000	450000	450000	450000	450000
233	0.0787972	0.0790891	0.0789432	0.33344	0.00300768	1591.36	450000	91.3575	91.3575		1591.36	450000	1591.36	1457.47	1815.83	1679.42	1679.42	450000	450000	450000	450000	450000
234	0.0790891	0.0793809	0.079235	0.336451	0.00301146	1595.2	450000	95.1976	95.1976		1595.2	450000	1595.2	1460.49	1820.52	1684.09	1684.09	450000	450000	450000	450000	450000
235	0.0793809	0.0796728	0.0795269	0.339466	0.00301505	1599.04	450000	99.0377	99.0377		1599.04	450000	1599.04	1463.52	1825.19	1688.75	1688.75	450000	450000	450000	450000	450000
236	0.0796728	0.0799646	0.0798187	0.342485	0.00301844	1602.88	450000	102.878	102.878		1602.88	450000	1602.88	1466.56	1829.85	1693.41	1693.41	450000	450000	450000	450000	450000
237	0.0799646	0.0802565	0.0801106	0.345507	0.00302163	1606.72	450000	106.718	106.718		1606.72	450000	1606.72	1469.6	1834.48	1698.06	1698.06	450000	450000	450000	450000	450000
238	0.0802565	0.0805483	0.0804024	0.348531	0.00302464	1610.56	450000	110.558	110.558		1610.56	450000	1610.56	1472.65	1839.1	1702.7	1702.7	450000	450000	450000	450000	450000
239	0.0805483	0.0808402	0.0806943	0.351559	0.00302745	1614.4	450000	114.398	114.398		1614.4	450000	1614.4	1475.71	1843.71	1707.34	1707.34	450000	450000	450000	450000	450000
240	0.0808402	0.081132	0.0809861	0.354589	0.00303007	1618.24	450000	118.238	118.238		1618.24	450000	1618.24	1478.77	1848.29	1711.96	1711.96	450000	450000	450000	450000	450000
241	0.081132	0.0814239	0.0812779	0.357621	0.0030325	1622.08	450000	122.078	122.078		1622.08	450000	1622.08	1481.84	1852.86	1716.59	1716.59	450000	450000	450000	450000	450000
242	0.0814239	0.0817157	0.0815698	0.360656	0.00303474	1625.92	450000	125.918	125.918		1625.92	450000	1625.92	1484.91	1857.42	1721.21	1721.21	450000	450000	450000	450000	450000
243	0.0817157	0.0820076	0.0818616	0.363693	0.00303679	1629.76	450000	129.758	129.758		1629.76	450000	1629.76	1487.99	1861.95	1725.82	1725.82	450000	450000	450000	450000	450000
244	0.0820076	0.0822994	0.0821535	0.366731	0.00303865	1633.6	450000	133.599	133.599		1633.6	450000	1633.6	1491.08	1866.47	1730.42	1730.42	450000	450000	450000	450000	450000
245	0.0822994	0.0825913	0.0824453	0.369772	0.00304033	1637.44	450000	137.439	137.439		1637.44	450000	1637.44	1494.17	1870.98	1735.02	1735.02	450000	450000	450000	450000	450000
246	0.0825913	0.0828831	0.0827372	0.372814	0.00304181	1641.28	450000	141.279	141.279		1641.28	450000	1641.28	1497.27	1875.47	1739.61	1739.61	450000	450000	450000	450000	450000
247	0.0828831	0.083175	0.083029	0.375857	0.00304312	1645.12	450000	145.119	145.119		1645.12	450000	1645.12	1500.38	1879.94	1744.2	1744.2	450000	450000	450000	450000	450000
248	0.083175	0.0834668	0.0833209	0.378901	0.00304423	1648.96	450000	148.959	148.959		1648.96	450000	1648.96	1503.49	1884.4	1748.78	1748.78	450000	450000	450000	450000	450000
249	0.0834668	0.0837587	0.0836127	0.381946	0.00304517	1652.8	450000	152.799	152.799		1652.8	450000	1652.8	1506.61	1888.84	1753.35	1753.35	450000	450000	450000	450000	450000
250	0.0837587	0.0840505	0.0839046	0.384992	0.00304592	1656.64	450000	156.639	156.639		1656.64	450000	1656.64	1509.74	1893.27	1757.92	1757.92	450000	450000	450000	450000	450000
251	0.0840505	0.0843423	0.0841964	0.388038	0.00304649	1660.48	450000	160.479	160.479		1660.48	450000	1660.48	1512.87	1897.68	1762.48	1762.48	450000	450000	450000	450000	450000
252	0.0843423	0.0846342	0.0844883	0.391085	0.00304688	1664.32	450000	164.319	164.319		1664.32	450000	1664.32	1516.01	1902.08	1767.03	1767.03	450000	450000	450000	450000	450000
253	0.0846342	0.084926	0.0847801	0.394132	0.00304709	1668.16	450000	168.159	168.159		1668.16	450000	1668.16	1519.15	1906.46	1771.58	1771.58	450000	450000	450000	450000	450000
254	0.084926	0.0852179	0.085072	0.39718	0.00304712	1672	450000	172	172		1672	450000	1672	1522.31	1910.82	1776.12	1776.12	450000	450000	450000	450000	450000
255	0.0852179	0.0855097	0.0853638	0.400226	0.00304697	1675.84	450000	175.84	175.84		1675.84	450000	1675.84	1525.46	1915.17	1780.65	1780.65	450000	450000	450000	450000	450000
256	0.0855097	0.0858016	0.0856557	0.403273	0.00304665	1679.68	450000	179.68	179.68		1679.68	450000	1679.68	1528.63	1919.51	1785.18	1785.18	450000	450000	450000	450000	450000
257	0.0858016	0.0860934	0.0859475	0.406319	0.00304615	1683.52	450000	183.52	183.52		1683.52	450000	1683.52	1531.8	1923.83	1789.71	1789.71	450000	450000	450000	450000	450000
258	0.0860934	0.0863853	0.0862394	0.409365	0.00304548	1687.36	450000	187.36	187.36		1687.36	450000	1687.36	1534.98	1928.14	1794.22	1794.22	450000	450000	450000	450000	450000
259	0.0863853	0.0866771	0.0865312	0.412409	0.00304463	1691.2	450000	191.2	191.2		1691.2	450000	1691.2	1538.16	1932.43	1798.73	1798.73	450000	450000	450000	450000	450000
260	0.0866771	0.086969	0.086823	0.415453	0.00304362	1695.04	450000	195.04	195.04		1695.04	450000	1695.04	1541.35	1936.71	1803.24	1803.24	450000	450000	450000	450000	450000
261	0.086969	0.0872608	0.0871149	0.418495	0.00304243	1698.88	450000	198.88	198.88		1698.88	450000	1698.88	1544.55	1940.97	1807.73	1807.73	450000	450000	450000	450000	450000
262	0.0872608	0.0875527	0.0874067	0.421537	0.00304108	1702.72	450000	202.72	202.72		1702.72	450000	1702.72	1547.76	1945.22	1812.22	1812.22	450000	450000	450000	450000	450000
263	0.0875527	0.0878445	0.0876986	0.424576	0.00303955	1706.56	450000	206.56	206.56		1706.56	450000	1706.56	1550.97	1949.45	1816.71	1816.71	450000	450000	450000	450000	450000
264	0.0878445	0.0881364	0.0879904	0.427614	0.00303786	1710.4	450000	210.4	210.4		1710.4	450000	1710.4	1554.19	1953.68	1821.19	1821.19	450000	450000	450000	450000	450000
265	0.0881364	0.0884282	0.0882823	0.43065	0.00303601	1714.24	450000	214.241	214.241		1714.24	450000	1714.24	1557.41	1957.88	1825.66	1825.66	450000	450000	450000	450000	450000
266	0.0884282	0.0887201	0.0885741	0.433684	0.00303399	1718.08	450000	218.081	218.081		1718.08	450000	1718.08	1560.64	1962.08	1830.12	1830.12	450000	450000	450000	450000	450000
267	0.0887201	0.0890119	0.088866	0.436716	0.0030318	1721.92	450000	221.921	221.921		1721.92	450000	1721.92	1563.88	1966.25	1834.58	1834.58	450000	450000	450000	450000	450000
268	0.0890119	0.0893037	0.0891578	0.439745	0.00302946	1725.76	450000	225.761	225.761		1725.76	450000	1725.76	1567.12	1970.42	1839.04	1839.04	450000	450000	450000	450000	450000
269	0.0893037	0.0895956	0.0894497	0.442772	0.00302696	1729.6	450000	229.601	229.601		1729.6	450000	1729.6	1570.37	1974.57	1843.48	1843.48	450000	450000	450000	450000	450000
270	0.0895956	0.0898874	0.0897415	0.445796	0.00302429	1733.44	450000	233.441	233.441		1733.44	450000	1733.44	1573.63	1978.71	1847.92	1847.92	450000	450000	450000	450000	450000
271	0.0898874	0.0901793	0.0900334	0.448818	0.00302147	1737.28	450000	237.281	237.281		1737.28	450000	1737.28	1576.9	1982.84	1852.36	1852.36	450000	450000	450000	450000	450000
272	0.0901793	0.0904711	0.0903252	0.451836	0.0030185	1741.12	450000	241.121	241.121		1741.12	450000	1741.12	1580.17	1986.95	1856.79	1856.79	450000	450000	450000	450000	450000
273	0.0904711	0.090763	0.0906171	0.454852	0.00301537	1744.96	450000	244.961	244.961		1744.96	450000	1744.96	1583.45	1991.05	1861.21	1861.21	450000	450000	450000	450000	450000
274	0.090763	0.0910548	0.0909089	0.457864	0.00301208	1748.8	450000	248.801	248.801		1748.8	450000	1748.8	1586.73	1995.13	1865.62	1865.62	450000	450000	450000	450000	450000
275	0.0910548	0.0913467	0.0912008	0.460873	0.00300865	1752.64	450000	252.642	252.642		1752.64	450000	1752.64	1590.02	1999.2	1870.03	1870.03	450000	450000	450000	450000	450000
276	0.0913467	0.0916385	0.0914926	0.463878	0.00300506	1756.48	450000	256.482	256.482		1756.48	450000	1756.48	1593.32	2003.26	1874.43	1874.43	450000	450000	450000	450000	450000
277	0.0916385	0.0919304	0.0917845	0.466879	0.00300133	1760.32	450000	260.322	260.322		1760.32	450000	1760.32	1596.63	2007.31	1878.83	1878.83	450000	450000	450000	450000	450000
278	0.0919304	0.0922222	0.0920763	0.469876	0.00299744	1764.16	450000	264.162	264.162		1764.16	450000	1764.16	1599.94	2011.34	1883.22	1883.22	450000	450000	450000	450000	450000
279	0.0922222	0.0925141	0.0923681	0.47287	0.00299341	1768	450000	268.002	268.002		1768	450000	1768	1603.26	2015.36	1887.6	1887.6	450000	450000	450000	450000	450000
280	0.0925141	0.0928059	0.09266	0.475859	0.00298924	1771.84	450000	271.842	271.842		1771.84	450000	1771.84	1606.59	2019.37	1891.98	1891.98	450000	450000	450000	450000	450000
281	0.0928059	0.0930978	0.0929518	0.478844	0.00298492	1775.68	450000	275.682	275.682		1775.68	450000	1775.68	1609.92	2023.36	1896.35	1896.35	450000	450000	450000	450000	450000
282	0.0930978	0.0933896	0.0932437	0.481824	0.00298047	1779.52	450000	279.522	279.522		1779.52	450000	1779.52	1613.26	2027.35	1900.72	1900.72	450000	450000	450000	450000	450000
283	0.0933896	0.0936815	0.0935355	0.4848	0.00297587	1783.36	450000	283.362	283.362		1783.36	450000	1783.36	1616.61	2031.32	1905.08	1905.08	450000	450000	450000	450000	450000
284	0.0936815	0.0939733	0.0938274	0.487771	0.00297113	1787.2	450000	287.202	287.202		1787.2	450000	1787.2	1619.96	2035.27	1909.43	1909.43	450000	450000	450000	450000	450000
285	0.0939733	0.0942652	0.0941192	0.490738	0.00296625	1791.04	450000	291.042	291.042		1791.04	450000	1791.04	1623.32	2039.22	1913.77	1913.77	450000	450000	450000	450000	450000
286	0.0942652	0.094557	0.0944111	0.493699	0.00296124	1794.88	450000	294.883	294.883		1794.88	450000	1794.88	1626.69	2043.15	1918.11	1918.11	450000	450000	450000	450000	450000
287	0.094557	0.0948488	0.0947029	0.496655	0.0029561	1798.72	450000	298.723	298.723		1798.72	450000	1798.72	1630.07	2047.07	1922.45	1922.45	450000	450000	450000	450000	450000
288	0.0948488	0.0951407	0.0949948	0.499606	0.00295082	1802.56	450000	302.563	302.563		1802.56	450000	1802.56	1633.45	2050.98	1926.77	1926.77	450000	450000	450000	450000	450000
289	0.0951407	0.0954325	0.0952866	0.502551	0.00294541	1806.4	450000	306.403	306.403		1806.4	450000	1806.4	1636.84	2054.88	1931.1	1931.1	450000	450000	450000	450000	450000
290	0.0954325	0.0957244	0.0955785	0.505491	0.00293987	1810.24	450000	310.243	310.243		1810.24	450000	1810.24	1640.23	2058.77	1935.41	1935.41	450000	450000	450000	450000	450000
291	0.0957244	0.0960162	0.0958703	0.508425	0.0029342	1814.08	450000	314.083	314.083		1814.08	450000	1814.08	1643.64	2062.64	1939.72	1939.72	450000	450000	450000	450000	450000
292	0.0960162	0.0963081	0.0961622	0.511354	0.00292841	1817.92	450000	317.923	317.923		1817.92	450000	1817.92	1647.05	2066.5	1944.02	1944.02	450000	450000	450000	450000	450000
293	0.0963081	0.0965999	0.096454	0.514276	0.00292249	1821.76	450000	321.763	321.763		1821.76	450000	1821.76	1650.46	2070.35	1948.31	1948.31	450000	450000	450000	450000	450000
294	0.0965999	0.0968918	0.0967459	0.517193	0.00291645	1825.6	450000	325.603	325.603		1825.6	450000	1825.6	1653.89	2074.19	1952.6	1952.6	450000	450000	450000	450000	450000
295	0.0968918	0.0971836	0.0970377	0.520103	0.00291028	1829.44	450000	329.443	329.443		1829.44	450000	1829.44	1657.32	2078.02	1956.89	1956.89	450000	450000	450000	450000	450000
296	0.0971836	0.0974755	0.0973295	0.523007	0.002904	1833.28	450000	333.284	333.284		1833.28	450000	1833.28	1660.76	2081.83	1961.16	1961.16	450000	450000	450000	450000	450000
297	0.0974755	0.0977673	0.0976214	0.525905	0.00289759	1837.12	450000	337.124	337.124		1837.12	450000	1837.12	1664.2	2085.63	1965.43	1965.43	450000	450000	450000	450000	450000
298	0.0977673	0.0980592	0.0979132	0.528796	0.00289107	1840.96	450000	340.964	340.964		1840.96	450000	1840.96	1667.66	2089.43	1969.7	1969.7	450000	450000	450000	450000	450000
299	0.0980592	0.098351	0.0982051	0.53168	0.00288443	1844.8	450000	344.804	344.804		1844.8	450000	1844.8	1671.12	2093.21	1973.95	1973.95	450000	450000	450000	450000	450000
300	0.098351	0.0986429	0.0984969	0.534558	0.00287768	1848.64	450000	348.644	348.644		1848.64	450000	1848.64	1674.58	2096.98	1978.21	1978.21	450000	450000	450000	450000	450000
301	0.0986429	0.0989347	0.0987888	0.537429	0.00287081	1852.48	450000	352.484	352.484		1852.48	450000	1852.48	1678.06	2100.74	1982.45	1982.45	450000	450000	450000	450000	450000
302	0.0989347	0.0992266	0.0990806	0.540292	0.00286384	1856.32	450000	356.324	356.324		1856.32	450000	1856.32	1681.54	2104.48	1986.69	1986.69	450000	450000	450000	450000	450000
303	0.0992266	0.0995184	0.0993725	0.543149	0.00285675	1860.16	450000	360.164	360.164		1860.16	450000	1860.16	1685.03	2108.22	1990.92	1990.92	450000	450000	450000	450000	450000
304	0.0995184	0.0998103	0.0996643	0.545999	0.00284955	1864	450000	364.004	364.004		1864	450000	1864	1688.52	2111.95	1995.15	1995.15	450000	450000	450000	450000	450000
305	0.0998103	0.100102	0.0999562	0.548841	0.00284225	1867.84	450000	367.844	367.844		1867.84	450000	1867.84	1692.03	2115.66	1999.37	1999.37	450000	450000	450000	450000	450000
306	0.100102	0.100394	0.100248	0.551676	0.00283485	1871.68	450000	371.684	371.684		1871.68	450000	1871.68	1695.54	2119.37	2003.58	2003.58	450000	450000	450000	450000	450000
307	0.100394	0.100686	0.10054	0.554503	0.00282734	1875.52	450000	375.525	375.525		1875.52	450000	1875.52	1699.05	2123.06	2007.79	2007.79	450000	450000	450000	450000	450000
308	0.100686	0.100978	0.100832	0.557323	0.00281972	1879.36	450000	379.365	379.365		1879.36	450000	1879.36	1702.58	2126.74	2011.99	2011.99	450000	450000	450000	450000	450000
309	0.100978	0.101269	0.101124	0.560135	0.00281201	1883.2	450000	383.205	383.205		1883.2	450000	1883.2	1706.11	2130.41	2016.18	2016.18	450000	450000	450000	450000	450000
310	0.101269	0.101561	0.101415	0.562939	0.0028042	1887.04	450000	387.045	387.045		1887.04	450000	1887.04	1709.65	2134.07	2020.37	2020.37	450000	450000	450000	450000	450000
311	0.101561	0.101853	0.101707	0.565735	0.00279629	1890.88	450000	390.885	390.885		1890.88	450000	1890.88	1713.2	2137.73	2024.55	2024.55	450000	450000	450000	450000	450000
312	0.101853	0.102145	0.101999	0.568524	0.00278828	1894.73	450000	394.725	394.725		1894.73	450000	1894.73	1716.75	2141.37	2028.73	2028.73	450000	450000	450000	450000	450000
313	0.102145	0.102437	0.102291	0.571304	0.00278018	1898.57	450000	398.565	398.565		1898.57	450000	1898.57	1720.31	2145	2032.9	2032.9	450000	450000	450000	450000	450000
314	0.102437	0.102729	0.102583	0.574076	0.00277199	1902.41	450000	402.405	402.405		1902.41	450000	1902.41	1723.88	2148.61	2037.06	2037.06	450000	450000	450000	450000	450000
315	0.102729	0.103021	0.102875	0.576839	0.0027637	1906.25	450000	406.245	406.245		1906.25	450000	1906.25	1727.46	2152.22	2041.22	2041.22	450000	450000	450000	450000	450000
316	0.103021	0.103312	0.103166	0.579595	0.00275533	1910.09	450000	410.085	410.085		1910.09	450000	1910.09	1731.04	2155.82	2045.37	2045.37	450000	450000	450000	450000	450000
317	0.103312	0.103604	0.103458	0.582342	0.00274687	1913.93	450000	413.926	413.926		1913.93	450000	1913.93	1734.64	2159.41	2049.51	2049.51	450000	450000	450000	450000	450000
318	0.103604	0.103896	0.10375	0.58508	0.00273832	1917.77	450000	417.766	417.766		1917.77	450000	1917.77	1738.23	2162.99	2053.65	2053.65	450000	450000	450000	450000	450000
319	0.103896	0.104188	0.104042	0.58781	0.00272969	1921.61	450000	421.606	421.606		1921.61	450000	1921.61	1741.84	2166.56	2057.78	2057.78	450000	450000	450000	450000	450000
320	0.104188	0.10448	0.104334	0.590531	0.00272097	1925.45	450000	425.446	425.446		1925.45	450000	1925.45	1745.45	2170.12	2061.9	2061.9	450000	450000	450000	450000	450000
321	0.10448	0.104772	0.104626	0.593243	0.00271217	1929.29	450000	429.286	429.286		1929.29	450000	1929.29	1749.08	2173.67	2066.02	2066.02	450000	450000	450000	450000	450000
322	0.104772	0.105064	0.104918	0.595946	0.00270329	1933.13	450000	433.126	433.126		1933.13	450000	1933.13	1752.7	2177.21	2070.14	2070.14	450000	450000	450000	450000	450000
323	0.105064	0.105355	0.105209	0.59864	0.00269433	1936.97	450000	436.966	436.966		1936.97	450000	1936.97	1756.34	2180.73	2074.24	2074.24	450000	450000	450000	450000	450000
324	0.105355	0.105647	0.105501	0.601326	0.00268529	1940.81	450000	440.806	440.806		1940.81	450000	1940.81	1759.98	2184.25	2078.34	2078.34	450000	450000	450000	450000	450000
325	0.105647	0.105939	0.105793	0.604002	0.00267617	1944.65	450000	444.646	444.646		1944.65	450000	1944.65	1763.64	2187.76	2082.44	2082.44	450000	450000	450000	450000	450000
326	0.105939	0.106231	0.106085	0.606669	0.00266699	1948.49	450000	448.486	448.486		1948.49	450000	1948.49	1767.3	2191.26	2086.52	2086.52	450000	450000	450000	450000	450000
327	0.106231	0.106523	0.106377	0.609327	0.00265772	1952.33	450000	452.326	452.326		1952.33	450000	1952.33	1770.96	2194.75	2090.6	2090.6	450000	450000	450000	450000	450000
328	0.106523	0.106815	0.106669	0.611975	0.00264839	1956.17	450000	456.167	456.167		1956.17	450000	1956.17	1774.64	2198.23	2094.68	2094.68	450000	450000	450000	450000	450000
329	0.106815	0.107106	0.106961	0.614614	0.00263899	1960.01	450000	460.007	460.007		1960.01	450000	1960.01	1778.32	2201.71	2098.75	2098.75	450000	450000	450000	450000	450000
330	0.107106	0.107398	0.107252	0.617243	0.00262951	1963.85	450000	463.847	463.847		1963.85	450000	1963.85	1782.01	2205.17	2102.81	2102.81	450000	450000	450000	450000	450000
331	0.107398	0.10769	0.107544	0.619863	0.00261997	1967.69	450000	467.687	467.687		1967.69	450000	1967.69	1785.7	2208.62	2106.86	2106.86	450000	450000	450000	450000	450000
332	0.10769	0.107982	0.107836	0.622474	0.00261037	1971.53	450000	471.527	471.527		1971.53	450000	1971.53	1789.41	2212.06	2110.91	2110.91	450000	450000	450000	450000	450000
333	0.107982	0.108274	0.108128	0.625075	0.00260069	1975.37	450000	475.367	475.367		1975.37	450000	1975.37	1793.12	2215.5	2114.96	2114.96	450000	450000	450000	450000	450000
334	0.108274	0.108566	0.10842	0.627665	0.00259096	1979.21	450000	479.207	479.207		1979.21	450000	1979.21	1796.84	2218.92	2118.99	2118.99	450000	450000	450000	450000	450000
335	0.108566	0.108858	0.108712	0.630247	0.00258116	1983.05	450000	483.047	483.047		1983.05	450000	1983.05	1800.57	2222.34	2123.02	2123.02	450000	450000	450000	450000	450000
336	0.108858	0.109149	0.109003	0.632818	0.00257131	1986.89	450000	486.887	486.887		1986.89	450000	1986.89	1804.31	2225.74	2127.05	2127.05	450000	450000	450000	450000	450000
337	0.109149	0.109441	0.109295	0.635379	0.00256139	1990.73	450000	490.727	490.727		1990.73	450000	1990.73	1808.05	2229.14	2131.07	2131.07	450000	450000	450000	450000	450000
338	0.109441	0.109733	0.109587	0.637931	0.00255142	1994.57	450000	494.568	494.568		1994.57	450000	1994.57	1811.8	2232.53	2135.08	2135.08	450000	450000	450000	450000	450000
339	0.109733	0.110025	0.109879	0.640472	0.00254139	1998.41	450000	498.408	498.408		1998.41	450000	1998.41	1815.56	2235.91	2139.08	2139.08	450000	450000	450000	450000	450000
340	0.110025	0.110317	0.110171	0.643003	0.00253131	2002.25	450000	502.248	502.248		2002.25	450000	2002.25	1819.33	2239.28	2143.08	2143.08	450000	450000	450000	450000	450000
341	0.110317	0.110609	0.110463	0.645525	0.00252117	2006.09	450000	506.088	506.088		2006.09	450000	2006.09	1823.1	2242.64	2147.07	2147.07	450000	450000	450000	450000	450000
342	0.110609	0.1109	0.110755	0.648036	0.00251098	2009.93	450000	509.928	509.928		2009.93	450000	2009.93	1826.88	2245.99	2151.06	2151.06	450000	450000	450000	450000	450000
343	0.1109	0.111192	0.111046	0.650536	0.00250075	2013.77	450000	513.768	513.768		2013.77	450000	2013.77	1830.67	2249.33	2155.04	2155.04	450000	450000	450000	450000	450000
344	0.111192	0.111484	0.111338	0.653027	0.00249046	2017.61	450000	517.608	517.608		2017.61	450000	2017.61	1834.47	2252.67	2159.01	2159.01	450000	450000	450000	450000	450000
345	0.111484	0.111776	0.11163	0.655507	0.00248012	2021.45	450000	521.448	521.448		2021.45	450000	2021.45	1838.28	2255.99	2162.98	2162.98	450000	450000	450000	450000	450000
346	0.111776	0.112068	0.111922	0.657977	0.00246974	2025.29	450000	525.288	525.288		2025.29	450000	2025.29	1842.09	2259.31	2166.94	2166.94	450000	450000	450000	450000	450000
347	0.112068	0.11236	0.112214	0.660436	0.00245931	2029.13	450000	529.128	529.128		2029.13	450000	2029.13	1845.91	2262.62	2170.9	2170.9	450000	450000	450000	450000	450000
348	0.11236	0.112652	0.112506	0.662885	0.00244884	2032.97	450000	532.969	532.969		2032.97	450000	2032.97	1849.74	2265.92	2174.84	2174.84	450000	450000	450000	450000	450000
349	0.112652	0.112943	0.112797	0.665323	0.00243833	2036.81	450000	536.809	536.809		2036.81	450000	2036.81	1853.58	2269.21	2178.79	2178.79	450000	450000	450000	450000	450000
350	0.112943	0.113235	0.113089	0.667751	0.00242777	2040.65	450000	540.649	540.649		2040.65	450000	2040.65	1857.43	2272.49	2182.72	2182.72	450000	450000	450000	450000	450000
351	0.113235	0.113527	0.113381	0.670168	0.00241718	2044.49	450000	544.489	544.489		2044.49	450000	2044.49	1861.28	2275.77	2186.65	2186.65	450000	450000	450000	450000	450000
352	0.113527	0.113819	0.113673	0.672575	0.00240654	2048.33	450000	548.329	548.329		2048.33	450000	2048.33	1865.14	2279.03	2190.57	2190.57	450000	450000	450000	450000	450000
353	0.113819	0.114111	0.113965	0.674971	0.00239587	2052.17	450000	552.169	552.169		2052.17	450000	2052.17	1869.01	2282.29	2194.49	2194.49	450000	450000	450000	450000	450000
354	0.114111	0.114403	0.114257	0.677356	0.00238517	2056.01	450000	556.009	556.009		2056.01	450000	2056.01	1872.89	2285.54	2198.4	2198.4	450000	450000	450000	450000	450000
355	0.114403	0.114694	0.114549	0.67973	0.00237443	2059.85	450000	559.849	559.849		2059.85	450000	2059.85	1876.77	2288.78	2202.31	2202.31	450000	450000	450000	450000	450000
356	0.114694	0.114986	0.11484	0.682094	0.00236365	2063.69	450000	563.689	563.689		2063.69	450000	2063.69	1880.67	2292.01	2206.2	2206.2	450000	450000	450000	450000	450000
357	0.114986	0.115278	0.115132	0.684447	0.00235284	2067.53	450000	567.529	567.529		2067.53	450000	2067.53	1884.57	2295.24	2210.1	2210.1	450000	450000	450000	450000	450000
358	0.115278	0.11557	0.115424	0.686789	0.002342	2071.37	450000	571.369	571.369		2071.37	450000	2071.37	1888.48	2298.45	2213.98	2213.98	450000	450000	450000	450000	450000
359	0.11557	0.115862	0.115716	0.68912	0.00233114	2075.21	450000	575.21	575.21		2075.21	450000	2075.21	1892.4	2301.66	2217.86	2217.86	450000	450000	450000	450000	450000
360	0.115862	0.116154	0.116008	0.69144	0.00232024	2079.05	450000	579.05	579.05		2079.05	450000	2079.05	1896.32	2304.86	2221.73	2221.73	450000	450000	450000	450000	450000
361	0.116154	0.116446	0.1163	0.693749	0.00230931	2082.89	450000	582.89	582.89		2082.89	450000	2082.89	1900.26	2308.05	2225.6	2225.6	450000	450000	450000	450000	450000
362	0.116446	0.116737	0.116591	0.696048	0.00229836	2086.73	450000	586.73	586.73		2086.73	450000	2086.73	1904.2	2311.24	2229.46	2229.46	450000	450000	450000	450000	450000
363	0.116737	0.117029	0.116883	0.698335	0.00228739	2090.57	450000	590.57	590.57		2090.57	450000	2090.57	1908.15	2314.41	2233.31	2233.31	450000	450000	450000	450000	450000
364	0.117029	0.117321	0.117175	0.700611	0.00227639	2094.41	450000	594.41	594.41		2094.41	450000	2094.41	1912.11	2317.58	2237.16	2237.16	450000	450000	450000	450000	450000
365	0.117321	0.117613	0.117467	0.702877	0.00226536	2098.25	450000	598.25	598.25		2098.25	450000	2098.25	1916.08	2320.74	2241	2241	450000	450000	450000	450000	450000
366	0.117613	0.117905	0.117759	0.705131	0.00225432	2102.09	450000	602.09	602.09		2102.09	450000	2102.09	1920.05	2323.9	2244.84	2244.84	450000	450000	450000	450000	450000
367	0.117905	0.118197	0.118051	0.707374	0.00224325	2105.93	450000	605.93	605.93		2105.93	450000	2105.93	1924.04	2327.04	2248.66	2248.66	450000	450000	450000	450000	450000
368	0.118197	0.118488	0.118343	0.709607	0.00223217	2109.77	450000	609.77	609.77		2109.77	450000	2109.77	1928.03	2330.18	2252.49	2252.49	450000	450000	450000	450000	450000
369	0.118488	0.11878	0.118634	0.711828	0.00222107	2113.61	450000	613.611	613.611		2113.61	450000	2113.61	1932.03	2333.31	2256.3	2256.3	450000	450000	450000	450000	450000
370	0.11878	0.119072	0.118926	0.714038	0.00220995	2117.45	450000	617.451	617.451		2117.45	450000	2117.45	1936.04	2336.43	2260.11	2260.11	450000	450000	450000	450000	450000
371	0.119072	0.119364	0.119218	0.716236	0.00219881	2121.29	450000	621.291	621.291		2121.29	450000	2121.29	1940.05	2339.54	2263.92	2263.92	450000	450000	450000	450000	450000
372	0.119364	0.119656	0.11951	0.718424	0.00218766	2125.13	450000	625.131	625.131		2125.13	450000	2125.13	1944.08	2342.65	2267.71	2267.71	450000	450000	450000	450000	450000
373	0.119656	0.119948	0.119802	0.720601	0.0021765	2128.97	450000	628.971	628.971		2128.97	450000	2128.97	1948.11	2345.75	2271.5	2271.5	450000	450000	450000	450000	450000
374	0.119948	0.12024	0.120094	0.722766	0.00216532	2132.81	450000	632.811	632.811		2132.81	450000	2132.81	1952.15	2348.84	2275.29	2275.29	450000	450000	450000	450000	450000
375	0.12024	0.120531	0.120385	0.72492	0.00215413	2136.65	450000	636.651	636.651		2136.65	450000	2136.65	1956.2	2351.92	2279.07	2279.07	450000	450000	450000	450000	450000
376	0.120531	0.120823	0.120677	0.727063	0.00214293	2140.49	450000	640.491	640.491		2140.49	450000	2140.49	1960.26	2355	2282.84	2282.84	450000	450000	450000	450000	450000
377	0.120823	0.121115	0.120969	0.729195	0.00213173	2144.33	450000	644.331	644.331		2144.33	450000	2144.33	1964.33	2358.07	2286.6	2286.6	450000	450000	450000	450000	450000
378	0.121115	0.121407	0.121261	0.731315	0.00212051	2148.17	450000	648.171	648.171		2148.17	450000	2148.17	1968.41	2361.13	2290.36	2290.36	450000	450000	450000	450000	450000
379	0.121407	0.121699	0.121553	0.733424	0.00210928	2152.01	450000	652.011	652.011		2152.01	450000	2152.01	1972.49	2364.18	2294.11	2294.11	450000	450000	450000	450000	450000
380	0.121699	0.121991	0.121845	0.735523	0.00209805	2155.85	450000	655.852	655.852		2155.85	450000	2155.85	1976.58	2367.23	2297.86	2297.86	450000	450000	450000	450000	450000
381	0.121991	0.122282	0.122137	0.737609	0.00208681	2159.69	450000	659.692	659.692		2159.69	450000	2159.69	1980.68	2370.27	2301.6	2301.6	450000	450000	450000	450000	450000
382	0.122282	0.122574	0.122428	0.739685	0.00207557	2163.53	450000	663.532	663.532		2163.53	450000	2163.53	1984.79	2373.3	2305.34	2305.34	450000	450000	450000	450000	450000
383	0.122574	0.122866	0.12272	0.741749	0.00206433	2167.37	450000	667.372	667.372		2167.37	450000	2167.37	1988.91	2376.33	2309.06	2309.06	450000	450000	450000	450000	450000
384	0.122866	0.123158	0.123012	0.743802	0.00205308	2171.21	450000	671.212	671.212		2171.21	450000	2171.21	1993.04	2379.34	2312.78	2312.78	450000	450000	450000	450000	450000
385	0.123158	0.12345	0.123304	0.745844	0.00204183	2175.05	450000	675.052	675.052		2175.05	450000	2175.05	1997.17	2382.35	2316.5	2316.5	450000	450000	450000	450000	450000
386	0.12345	0.123742	0.123596	0.747875	0.00203058	2178.89	450000	678.892	678.892		2178.89	450000	2178.89	2001.31	2385.36	2320.21	2320.21	450000	450000	450000	450000	450000
387	0.123742	0.124034	0.123888	0.749894	0.00201933	2182.73	450000	682.732	682.732		2182.73	450000	2182.73	2005.47	2388.35	2323.91	2323.91	450000	450000	450000	450000	450000
388	0.124034	0.124325	0.124179	0.751902	0.00200808	2186.57	450000	686.572	686.572		2186.57	450000	2186.57	2009.63	2391.34	2327.61	2327.61	450000	450000	450000	450000	450000
389	0.124325	0.124617	0.124471	0.753899	0.00199683	2190.41	450000	690.412	690.412		2190.41	450000	2190.41	2013.8	2394.32	2331.3	2331.3	450000	450000	450000	450000	450000
390	0.124617	0.124909	0.124763	0.755885	0.00198558	2194.25	450000	694.253	694.253		2194.25	450000	2194.25	2017.97	2397.3	2334.98	2334.98	450000	450000	450000	450000	450000
391	0.124909	0.125201	0.125055	0.757859	0.00197434	2198.09	450000	698.093	698.093		2198.09	450000	2198.09	2022.16	2400.27	2338.66	2338.66	450000	450000	450000	450000	450000
392	0.125201	0.125493	0.125347	0.759822	0.00196311	2201.93	450000	701.933	701.933		2201.93	450000	2201.93	2026.36	2403.23	2342.33	2342.33	450000	450000	450000	450000	450000
393	0.125493	0.125785	0.125639	0.761774	0.00195187	2205.77	450000	705.773	705.773		2205.77	450000	2205.77	2030.56	2406.18	2345.99	2345.99	450000	450000	450000	450000	450000
394	0.125785	0.126077	0.125931	0.763714	0.00194065	2209.61	450000	709.613	709.613		2209.61	450000	2209.61	2034.77	2409.13	2349.65	2349.65	450000	450000	450000	450000	450000
395	0.126077	0.126368	0.126222	0.765644	0.00192943	2213.45	450000	713.453	713.453		2213.45	450000	2213.45	2039	2412.07	2353.3	2353.3	450000	450000	450000	450000	450000
396	0.126368	0.12666	0.126514	0.767562	0.00191822	2217.29	450000	717.293	717.293		2217.29	450000	2217.29	2043.23	2415.01	2356.95	2356.95	450000	450000	450000	450000	450000
397	0.12666	0.126952	0.126806	0.769469	0.00190702	2221.13	450000	721.133	721.133		2221.13	450000	2221.13	2047.46	2417.93	2360.59	2360.59	450000	450000	450000	450000	450000
398	0.126952	0.127244	0.127098	0.771365	0.00189583	2224.97	450000	724.973	724.973		2224.97	450000	2224.97	2051.71	2420.86	2364.22	2364.22	450000	450000	450000	450000	450000
399	0.127244	0.127536	0.12739	0.77325	0.00188465	2228.81	450000	728.813	728.813		2228.81	450000	2228.81	2055.97	2423.77	2367.85	2367.85	450000	450000	450000	450000	450000
400	0.127536	0.127828	0.127682	0.775123	0.00187348	2232.65	450000	732.653	732.653		2232.65	450000	2232.65	2060.24	2426.68	2371.47	2371.47	450000	450000	450000	450000	450000
401	0.127828	0.128119	0.127974	0.776985	0.00186232	2236.49	450000	736.494	736.494		2236.49	450000	2236.49	2064.51	2429.58	2375.08	2375.08	450000	450000	450000	450000	450000
402	0.128119	0.128411	0.128265	0.778837	0.00185118	2240.33	450000	740.334	740.334		2240.33	450000	2240.33	2068.79	2432.47	2378.69	2378.69	450000	450000	450000	450000	450000
403	0.128411	0.128703	0.128557	0.780677	0.00184005	2244.17	450000	744.174	744.174		2244.17	450000	2244.17	2073.08	2435.36	2382.29	2382.29	450000	450000	450000	450000	450000
404	0.128703	0.128995	0.128849	0.782506	0.00182893	2248.01	450000	748.014	748.014		2248.01	450000	2248.01	2077.39	2438.24	2385.88	2385.88	450000	450000	450000	450000	450000
405	0.128995	0.129287	0.129141	0.784323	0.00181783	2251.85	450000	751.854	751.854		2251.85	450000	2251.85	2081.7	2441.11	2389.47	2389.47	450000	450000	450000	450000	450000
406	0.129287	0.129579	0.129433	0.78613	0.00180674	2255.69	450000	755.694	755.694		2255.69	450000	2255.69	2086.01	2443.98	2393.05	2393.05	450000	450000	450000	450000	450000
407	0.129579	0.129871	0.129725	0.787926	0.00179567	2259.53	450000	759.534	759.534		2259.53	450000	2259.53	2090.34	2446.84	2396.63	2396.63	450000	450000	450000	450000	450000
408	0.129871	0.130162	0.130016	0.78971	0.00178462	2263.37	450000	763.374	763.374		2263.37	450000	2263.37	2094.68	2449.7	2400.2	2400.2	450000	450000	450000	450000	450000
409	0.130162	0.130454	0.130308	0.791484	0.00177359	2267.21	450000	767.214	767.214		2267.21	450000	2267.21	2099.03	2452.55	2403.76	2403.76	450000	450000	450000	450000	450000
410	0.130454	0.130746	0.1306	0.793247	0.00176257	2271.05	450000	771.054	771.054		2271.05	450000	2271.05	2103.38	2455.39	2407.32	2407.32	450000	450000	450000	450000	450000
411	0.130746	0.131038	0.130892	0.794998	0.00175157	2274.89	450000	774.895	774.895		2274.89	450000	2274.89	2107.74	2458.22	2410.87	2410.87	450000	450000	450000	450000	450000
412	0.131038	0.13133	0.131184	0.796739	0.0017406	2278.73	450000	778.735	778.735		2278.73	450000	2278.73	2112.12	2461.05	2414.42	2414.42	450000	450000	450000	450000	450000
413	0.13133	0.131622	0.131476	0.798468	0.00172964	2282.57	450000	782.575	782.575		2282.57	450000	2282.57	2116.5	2463.88	2417.96	2417.96	450000	450000	450000	450000	450000
414	0.131622	0.131913	0.131768	0.800187	0.00171871	2286.41	450000	786.415	786.415		2286.41	450000	2286.41	2120.89	2466.69	2421.49	2421.49	450000	450000	450000	450000	450000
415	0.131913	0.132205	0.132059	0.801895	0.00170779	2290.25	450000	790.255	790.255		2290.25	450000	2290.25	2125.29	2469.5	2425.01	2425.01	450000	450000	450000	450000	450000
416	0.132205	0.132497	0.132351	0.803592	0.0016969	2294.09	450000	794.095	794.095		2294.09	450000	2294.09	2129.7	2472.31	2428.53	2428.53	450000	450000	450000	450000	450000
417	0.132497	0.132789	0.132643	0.805278	0.00168603	2297.94	450000	797.935	797.935		2297.94	450000	2297.94	2134.12	2475.11	2432.05	2432.05	450000	450000	450000	450000	450000
418	0.132789	0.133081	0.132935	0.806953	0.00167519	2301.78	450000	801.775	801.775		2301.78	450000	2301.78	2138.55	2477.9	2435.55	2435.55	450000	450000	450000	450000	450000
419	0.133081	0.133373	0.133227	0.808617	0.00166437	2305.62	450000	805.615	805.615		2305.62	450000	2305.62	2142.98	2480.69	2439.05	2439.05	450000	450000	450000	450000	450000
420	0.133373	0.133665	0.133519	0.810271	0.00165358	2309.46	450000	809.455	809.455		2309.46	450000	2309.46	2147.43	2483.47	2442.55	2442.55	450000	450000	450000	450000	450000
421	0.133665	0.133956	0.13381	0.811914	0.00164281	2313.3	450000	813.295	813.295		2313.3	450000	2313.3	2151.88	2486.24	2446.03	2446.03	450000	450000	450000	450000	450000
422	0.133956	0.134248	0.134102	0.813546	0.00163206	2317.14	450000	817.136	817.136		2317.14	450000	2317.14	2156.35	2489.01	2449.52	2449.52	450000	450000	450000	450000	450000
423	0.134248	0.13454	0.134394	0.815167	0.00162135	2320.98	450000	820.976	820.976		2320.98	450000	2320.98	2160.82	2491.77	2452.99	2452.99	450000	450000	450000	450000	450000
424	0.13454	0.134832	0.134686	0.816778	0.00161066	2324.82	450000	824.816	824.816		2324.82	450000	2324.82	2165.31	2494.53	2456.46	2456.46	450000	450000	450000	450000	450000
425	0.134832	0.135124	0.134978	0.818378	0.00159999	2328.66	450000	828.656	828.656		2328.66	450000	2328.66	2169.8	2497.28	2459.92	2459.92	450000	450000	450000	450000	450000
426	0.135124	0.135416	0.13527	0.819967	0.00158936	2332.5	450000	832.496	832.496		2332.5	450000	2332.5	2174.3	2500.02	2463.38	2463.38	450000	450000	450000	450000	450000
427	0.135416	0.135707	0.135562	0.821546	0.00157875	2336.34	450000	836.336	836.336		2336.34	450000	2336.34	2178.81	2502.76	2466.83	2466.83	450000	450000	450000	450000	450000
428	0.135707	0.135999	0.135853	0.823114	0.00156818	2340.18	450000	840.176	840.176		2340.18	450000	2340.18	2183.33	2505.49	2470.27	2470.27	450000	450000	450000	450000	450000
429	0.135999	0.136291	0.136145	0.824672	0.00155763	2344.02	450000	844.016	844.016		2344.02	450000	2344.02	2187.86	2508.22	2473.71	2473.71	450000	450000	450000	450000	450000
430	0.136291	0.136583	0.136437	0.826219	0.00154711	2347.86	450000	847.856	847.856		2347.86	450000	2347.86	2192.4	2510.94	2477.14	2477.14	450000	450000	450000	450000	450000
431	0.136583	0.136875	0.136729	0.827756	0.00153663	2351.7	450000	851.696	851.696		2351.7	450000	2351.7	2196.95	2513.65	2480.57	2480.57	450000	450000	450000	450000	450000
432	0.136875	0.137167	0.137021	0.829282	0.00152617	2355.54	450000	855.537	855.537		2355.54	450000	2355.54	2201.51	2516.36	2483.98	2483.98	450000	450000	450000	450000	450000
433	0.137167	0.137459	0.137313	0.830797	0.00151575	2359.38	450000	859.377	859.377		2359.38	450000	2359.38	2206.07	2519.06	2487.4	2487.4	450000	450000	450000	450000	450000
434	0.137459	0.13775	0.137604	0.832303	0.00150536	2363.22	450000	863.217	863.217		2363.22	450000	2363.22	2210.65	2521.76	2490.8	2490.8	450000	450000	450000	450000	450000
435	0.13775	0.138042	0.137896	0.833798	0.001495	2367.06	450000	867.057	867.057		2367.06	450000	2367.06	2215.24	2524.45	2494.2	2494.2	450000	450000	450000	450000	450000
436	0.138042	0.138334	0.138188	0.835283	0.00148467	2370.9	450000	870.897	870.897		2370.9	450000	2370.9	2219.83	2527.14	2497.59	2497.59	450000	450000	450000	450000	450000
437	0.138334	0.138626	0.13848	0.836757	0.00147438	2374.74	450000	874.737	874.737		2374.74	450000	2374.74	2224.44	2529.82	2500.98	2500.98	450000	450000	450000	450000	450000
438	0.138626	0.138918	0.138772	0.838221	0.00146412	2378.58	450000	878.577	878.577		2378.58	450000	2378.58	2229.05	2532.49	2504.36	2504.36	450000	450000	450000	450000	450000
439	0.138918	0.13921	0.139064	0.839675	0.0014539	2382.42	450000	882.417	882.417		2382.42	450000	2382.42	2233.68	2535.16	2507.74	2507.74	450000	450000	450000	450000	450000
440	0.13921	0.139501	0.139356	0.841119	0.00144371	2386.26	450000	886.257	886.257		2386.26	450000	2386.26	2238.31	2537.83	2511.1	2511.1	450000	450000	450000	450000	450000
441	0.139501	0.139793	0.139647	0.842552	0.00143355	2390.1	450000	890.097	890.097		2390.1	450000	2390.1	2242.96	2540.48	2514.47	2514.47	450000	450000	450000	450000	450000
442	0.139793	0.140085	0.139939	0.843976	0.00142343	2393.94	450000	893.937	893.937		2393.94	450000	2393.94	2247.61	2543.14	2517.82	2517.82	450000	450000	450000	450000	450000
443	0.140085	0.140377	0.140231	0.845389	0.00141335	2397.78	450000	897.778	897.778		2397.78	450000	2397.78	2252.27	2545.78	2521.17	2521.17	450000	450000	450000	450000	450000
444	0.140377	0.140669	0.140523	0.846792	0.0014033	2401.62	450000	901.618	901.618		2401.62	450000	2401.62	2256.95	2548.42	2524.51	2524.51	450000	450000	450000	450000	450000
445	0.140669	0.140961	0.140815	0.848186	0.00139329	2405.46	450000	905.458	905.458		2405.46	450000	2405.46	2261.63	2551.06	2527.85	2527.85	450000	450000	450000	450000	450000
446	0.140961	0.141253	0.141107	0.849569	0.00138331	2409.3	450000	909.298	909.298		2409.3	450000	2409.3	2266.32	2553.69	2531.18	2531.18	450000	450000	450000	450000	450000
447	0.141253	0.141544	0.141398	0.850942	0.00137338	2413.14	450000	913.138	913.138		2413.14	450000	2413.14	2271.02	2556.31	2534.5	2534.5	450000	450000	450000	450000	450000
448	0.141544	0.141836	0.14169	0.852306	0.00136348	2416.98	450000	916.978	916.978		2416.98	450000	2416.98	2275.74	2558.93	2537.82	2537.82	450000	450000	450000	450000	450000
449	0.141836	0.142128	0.141982	0.853659	0.00135361	2420.82	450000	920.818	920.818		2420.82	450000	2420.82	2280.46	2561.55	2541.13	2541.13	450000	450000	450000	450000	450000
450	0.142128	0.14242	0.142274	0.855003	0.00134379	2424.66	450000	924.658	924.658		2424.66	450000	2424.66	2285.19	2564.16	2544.44	2544.44	450000	450000	450000	450000	450000
451	0.14242	0.142712	0.142566	0.856337	0.001334	2428.5	450000	928.498	928.498		2428.5	450000	2428.5	2289.93	2566.76	2547.73	2547.73	450000	450000	450000	450000	450000
452	0.142712	0.143004	0.142858	0.857661	0.00132425	2432.34	450000	932.338	932.338		2432.34	450000	2432.34	2294.68	2569.36	2551.03	2551.03	450000	450000	450000	450000	450000
453	0.143004	0.143295	0.14315	0.858976	0.00131455	2436.18	450000	936.179	936.179		2436.18	450000	2436.18	2299.44	2571.95	2554.31	2554.31	450000	450000	450000	450000	450000
454	0.143295	0.143587	0.143441	0.860281	0.00130488	2440.02	450000	940.019	940.019		2440.02	450000	2440.02	2304.21	2574.54	2557.59	2557.59	450000	450000	450000	450000	450000
455	0.143587	0.143879	0.143733	0.861576	0.00129525	2443.86	450000	943.859	943.859		2443.86	450000	2443.86	2308.99	2577.12	2560.87	2560.87	450000	450000	450000	450000	450000
456	0.143879	0.144171	0.144025	0.862862	0.00128566	2447.7	450000	947.699	947.699		2447.7	450000	2447.7	2313.78	2579.7	2564.13	2564.13	450000	450000	450000	450000	450000
457	0.144171	0.144463	0.144317	0.864138	0.00127611	2451.54	450000	951.539	951.539		2451.54	450000	2451.54	2318.58	2582.27	2567.39	2567.39	450000	450000	450000	450000	450000
458	0.144463	0.144755	0.144609	0.865404	0.0012666	2455.38	450000	955.379	955.379		2455.38	450000	2455.38	2323.39	2584.84	2570.65	2570.65	450000	450000	450000	450000	450000
459	0.144755	0.145047	0.144901	0.866662	0.00125713	2459.22	450000	959.219	959.219		2459.22	450000	2459.22	2328.21	2587.4	2573.9	2573.9	450000	450000	450000	450000	450000
460	0.145047	0.145338	0.145192	0.867909	0.0012477	2463.06	450000	963.059	963.059		2463.06	450000	2463.06	2333.04	2589.95	2577.14	2577.14	450000	450000	450000	450000	450000
461	0.145338	0.14563	0.145484	0.869148	0.00123831	2466.9	450000	966.899	966.899		2466.9	450000	2466.9	2337.88	2592.5	2580.37	2580.37	450000	450000	450000	450000	450000
462	0.14563	0.145922	0.145776	0.870376	0.00122897	2470.74	450000	970.739	970.739		2470.74	450000	2470.74	2342.74	2595.05	2583.6	2583.6	450000	450000	450000	450000	450000
463	0.145922	0.146214	0.146068	0.871596	0.00121966	2474.58	450000	974.579	974.579		2474.58	450000	2474.58	2347.6	2597.59	2586.82	2586.82	450000	450000	450000	450000	450000
464	0.146214	0.146506	0.14636	0.872807	0.0012104	2478.42	450000	978.42	978.42		2478.42	450000	2478.42	2352.47	2600.13	2590.04	2590.04	450000	450000	450000	450000	450000
465	0.146506	0.146798	0.146652	0.874008	0.00120118	2482.26	450000	982.26	982.26		2482.26	450000	2482.26	2357.35	2602.66	2593.25	2593.25	450000	450000	450000	450000	450000
466	0.146798	0.14709	0.146944	0.8752	0.001192	2486.1	450000	986.1	986.1		2486.1	450000	2486.1	2362.24	2605.18	2596.46	2596.46	450000	450000	450000	450000	450000
467	0.14709	0.147381	0.147235	0.876383	0.00118286	2489.94	450000	989.94	989.94		2489.94	450000	2489.94	2367.14	2607.7	2599.65	2599.65	450000	450000	450000	450000	450000
468	0.147381	0.147673	0.147527	0.877556	0.00117377	2493.78	450000	993.78	993.78		2493.78	450000	2493.78	2372.05	2610.22	2602.84	2602.84	450000	450000	450000	450000	450000
469	0.147673	0.147965	0.147819	0.878721	0.00116472	2497.62	450000	997.62	997.62		2497.62	450000	2497.62	2376.97	2612.73	2606.03	2606.03	450000	450000	450000	450000	450000
470	0.147965	0.148257	0.148111	0.879877	0.00115571	2501.46	450000	1001.46	1001.46		2501.46	450000	2501.46	2381.9	2615.24	2609.21	2609.21	450000	450000	450000	450000	450000
471	0.148257	0.148549	0.148403	0.881024	0.00114674	2505.3	450000	1005.3	1005.3		2505.3	450000	2505.3	2386.84	2617.74	2612.38	2612.38	450000	450000	450000	450000	450000
472	0.148549	0.148841	0.148695	0.882161	0.00113782	2509.14	450000	1009.14	1009.14		2509.14	450000	2509.14	2391.8	2620.23	2615.55	2615.55	450000	450000	450000	450000	450000
473	0.148841	0.149132	0.148987	0.88329	0.00112894	2512.98	450000	1012.98	1012.98		2512.98	450000	2512.98	2396.76	2622.73	2618.71	2618.71	450000	450000	450000	450000	450000
474	0.149132	0.149424	0.149278	0.88441	0.00112011	2516.82	450000	1016.82	1016.82		2516.82	450000	2516.82	2401.73	2625.21	2621.86	2621.86	450000	450000	450000	450000	450000
475	0.149424	0.149716	0.14957	0.885522	0.00111132	2520.66	450000	1020.66	1020.66		2520.66	450000	2520.66	2406.71	2627.69	2625.01	2625.01	450000	450000	450000	450000	450000
476	0.149716	0.150008	0.149862	0.886624	0.00110257	2524.5	450000	1024.5	1024.5		2524.5	450000	2524.5	2411.71	2630.17	2628.15	2628.15	450000	450000	450000	450000	450000
477	0.150008	0.1503	0.150154	0.887718	0.00109386	2528.34	450000	1028.34	1028.34		2528.34	450000	2528.34	2416.71	2632.64	2631.28	2631.28	450000	450000	450000	450000	450000
478	0.1503	0.150592	0.150446	0.888803	0.0010852	2532.18	450000	1032.18	1032.18		2532.18	450000	2532.18	2421.73	2635.11	2634.41	2634.41	450000	450000	450000	450000	450000
479	0.150592	0.150884	0.150738	0.88988	0.00107658	2536.02	450000	1036.02	1036.02		2536.02	450000	2536.02	2426.75	2637.57	2637.53	2637.53	450000	450000	450000	450000	450000
480	0.150884	0.151175	0.151029	0.890948	0.00106801	2539.86	450000	1039.86	1039.86		2539.86	450000	2539.86	2431.78	2640.03	2640.65	2640.65	450000	450000	450000	450000	450000
481	0.151175	0.151467	0.151321	0.892007	0.00105948	2543.7	450000	1043.7	1043.7		2543.7	450000	2543.7	2436.83	2642.48	2643.76	2643.76	450000	450000	450000	450000	450000
482	0.151467	0.151759	0.151613	0.893058	0.001051	2547.54	450000	1047.54	1047.54		2547.54	450000	2547.54	2441.89	2644.93	2646.86	2646.86	450000	450000	450000	450000	450000
483	0.151759	0.152051	0.151905	0.894101	0.00104256	2551.38	450000	1051.38	1051.38		2551.38	450000	2551.38	2446.95	2647.37	2649.96	2649.96	450000	450000	450000	450000	450000
484	0.152051	0.152343	0.152197	0.895135	0.00103417	2555.22	450000	1055.22	1055.22		2555.22	450000	2555.22	2452.03	2649.81	2653.05	2653.05	450000	450000	450000	450000	450000
485	0.152343	0.152635	0.152489	0.896161	0.00102581	2559.06	450000	1059.06	1059.06		2559.06	450000	2559.06	2457.12	2652.24	2656.13	2656.13	450000	450000	450000	450000	450000
486	0.152635	0.152926	0.152781	0.897178	0.00101751	2562.9	450000	1062.9	1062.9		2562.9	450000	2562.9	2462.21	2654.67	2659.21	2659.21	450000	450000	450000	450000	450000
487	0.152926	0.153218	0.153072	0.898188	0.00100925	2566.74	450000	1066.74	1066.74		2566.74	450000	2566.74	2467.32	2657.1	2662.28	2662.28	450000	450000	450000	450000	450000
488	0.153218	0.15351	0.153364	0.899189	0.00100103	2570.58	450000	1070.58	1070.58		2570.58	450000	2570.58	2472.44	2659.52	2665.34	2665.34	450000	450000	450000	450000	450000
489	0.15351	0.153802	0.153656	0.900182	0.000992861	2574.42	450000	1074.42	1074.42		2574.42	450000	2574.42	2477.57	2661.93	2668.4	2668.4	450000	450000	450000	450000	450000
490	0.153802	0.154094	0.153948	0.901166	0.000984735	2578.26	450000	1078.26	1078.26		2578.26	450000	2578.26	2482.71	2664.34	2671.46	2671.46	450000	450000	450000	450000	450000
491	0.154094	0.154386	0.15424	0.902143	0.000976653	2582.1	450000	1082.1	1082.1		2582.1	450000	2582.1	2487.86	2666.75	2674.5	2674.5	450000	450000	450000	450000	450000
492	0.154386	0.154678	0.154532	0.903112	0.000968617	2585.94	450000	1085.94	1085.94		2585.94	450000	2585.94	2493.02	2669.15	2677.54	2677.54	450000	450000	450000	450000	450000
493	0.154678	0.154969	0.154823	0.904072	0.000960625	2589.78	450000	1089.78	1089.78		2589.78	450000	2589.78	2498.2	2671.55	2680.58	2680.58	450000	450000	450000	450000	450000
494	0.154969	0.155261	0.155115	0.905025	0.000952679	2593.62	450000	1093.62	1093.62		2593.62	450000	2593.62	2503.38	2673.94	2683.6	2683.6	450000	450000	450000	450000	450000
495	0.155261	0.155553	0.155407	0.90597	0.000944778	2597.46	450000	1097.46	1097.46		2597.46	450000	2597.46	2508.57	2676.33	2686.62	2686.62	450000	450000	450000	450000	450000
496	0.155553	0.155845	0.155699	0.906907	0.000936922	2601.3	450000	1101.3	1101.3		2601.3	450000	2601.3	2513.78	2678.71	2689.64	2689.64	450000	450000	450000	450000	450000
497	0.155845	0.156137	0.155991	0.907836	0.000929111	2605.14	450000	1105.14	1105.14		2605.14	450000	2605.14	2518.99	2681.09	2692.65	2692.65	450000	450000	450000	450000	450000
498	0.156137	0.156429	0.156283	0.908757	0.000921346	2608.98	450000	1108.98	1108.98		2608.98	450000	2608.98	2524.22	2683.47	2695.65	2695.65	450000	450000	450000	450000	450000
499	0.156429	0.15672	0.156575	0.909671	0.000913625	2612.82	450000	1112.82	1112.82		2612.82	450000	2612.82	2529.46	2685.84	2698.64	2698.64	450000	450000	450000	450000	450000
500	0.15672	0.157012	0.156866	0.910577	0.00090595	2616.66	450000	1116.66	1116.66		2616.66	450000	2616.66	2534.7	2688.2	2701.63	2701.63	450000	450000	450000	450000	450000
501	0.157012	0.157304	0.157158	0.911475	0.000898319	2620.5	450000	1120.5	1120.5		2620.5	450000	2620.5	2539.96	2690.56	2704.62	2704.62	450000	450000	450000	450000	450000
502	0.157304	0.157596	0.15745	0.912366	0.000890734	2624.34	450000	1124.34	1124.34		2624.34	450000	2624.34	2545.23	2692.92	2707.59	2707.59	450000	450000	450000	450000	450000
503	0.157596	0.157888	0.157742	0.913249	0.000883195	2628.18	450000	1128.18	1128.18		2628.18	450000	2628.18	2550.51	2695.27	2710.56	2710.56	450000	450000	450000	450000	450000
504	0.157888	0.15818	0.158034	0.914125	0.0008757	2632.02	450000	1132.02	1132.02		2632.02	450000	2632.02	2555.8	2697.62	2713.53	2713.53	450000	450000	450000	450000	450000
505	0.15818	0.158472	0.158326	0.914993	0.00086825	2635.86	450000	1135.86	1135.86		2635.86	450000	2635.86	2561.11	2699.97	2716.49	2716.49	450000	450000	450000	450000	450000
506	0.158472	0.158763	0.158617	0.915854	0.000860846	2639.7	450000	1139.7	1139.7		2639.7	450000	2639.7	2566.42	2702.31	2719.44	2719.44	450000	450000	450000	450000	450000
507	0.158763	0.159055	0.158909	0.916707	0.000853486	2643.54	450000	1143.54	1143.54		2643.54	450000	2643.54	2571.74	2704.64	2722.38	2722.38	450000	450000	450000	450000	450000
508	0.159055	0.159347	0.159201	0.917553	0.000846172	2647.38	450000	1147.38	1147.38		2647.38	450000	2647.38	2577.08	2706.97	2725.32	2725.32	450000	450000	450000	450000	450000
509	0.159347	0.159639	0.159493	0.918392	0.000838902	2651.22	450000	1151.22	1151.22		2651.22	450000	2651.22	2582.43	2709.3	2728.25	2728.25	450000	450000	450000	450000	450000
510	0.159639	0.159931	0.159785	0.919224	0.000831678	2655.06	450000	1155.06	1155.06		2655.06	450000	2655.06	2587.78	2711.62	2731.18	2731.18	450000	450000	450000	450000	450000
511	0.159931	0.160223	0.160077	0.920048	0.000824498	2658.9	450000	1158.9	1158.9		2658.9	450000	2658.9	2593.15	2713.94	2734.1	2734.1	450000	450000	450000	450000	450000
512	0.160223	0.160514	0.160369	0.920866	0.000817364	2662.74	450000	1162.74	1162.74		2662.74	450000	2662.74	2598.53	2716.25	2737.01	2737.01	450000	450000	450000	450000	450000
513	0.160514	0.160806	0.16066	0.921676	0.000810274	2666.58	450000	1166.58	1166.58		2666.58	450000	2666.58	2603.92	2718.56	2739.92	2739.92	450000	450000	450000	450000	450000
514	0.160806	0.161098	0.160952	0.922479	0.000803229	2670.42	450000	1170.42	1170.42		2670.42	450000	2670.42	2609.33	2720.87	2742.82	2742.82	450000	450000	450000	450000	450000
515	0.161098	0.16139	0.161244	0.923276	0.000796228	2674.26	450000	1174.26	1174.26		2674.26	450000	2674.26	2614.74	2723.17	2745.72	2745.72	450000	450000	450000	450000	450000
516	0.16139	0.161682	0.161536	0.924065	0.000789273	2678.1	450000	1178.1	1178.1		2678.1	450000	2678.1	2620.17	2725.47	2748.61	2748.61	450000	450000	450000	450000	450000
517	0.161682	0.161974	0.161828	0.924847	0.000782361	2681.94	450000	1181.94	1181.94		2681.94	450000	2681.94	2625.6	2727.76	2751.49	2751.49	450000	450000	450000	450000	450000
518	0.161974	0.162266	0.16212	0.925623	0.000775495	2685.78	450000	1185.78	1185.78		2685.78	450000	2685.78	2631.05	2730.05	2754.36	2754.36	450000	450000	450000	450000	450000
519	0.162266	0.162557	0.162411	0.926391	0.000768673	2689.62	450000	1189.62	1189.62		2689.62	450000	2689.62	2636.51	2732.34	2757.23	2757.23	450000	450000	450000	450000	450000
520	0.162557	0.162849	0.162703	0.927153	0.000761895	2693.46	450000	1193.46	1193.46		2693.46	450000	2693.46	2641.98	2734.62	2760.1	2760.1	450000	450000	450000	450000	450000
521	0.162849	0.163141	0.162995	0.927908	0.000755161	2697.31	450000	1197.31	1197.31		2697.31	450000	2697.31	2647.46	2736.89	2762.95	2762.95	450000	450000	450000	450000	450000
522	0.163141	0.163433	0.163287	0.928657	0.000748472	2701.15	450000	1201.15	1201.15		2701.15	450000	2701.15	2652.95	2739.17	2765.8	2765.8	450000	450000	450000	450000	450000
523	0.163433	0.163725	0.163579	0.929399	0.000741827	2704.99	450000	1204.99	1204.99		2704.99	450000	2704.99	2658.46	2741.43	2768.65	2768.65	450000	450000	450000	450000	450000
524	0.163725	0.164017	0.163871	0.930134	0.000735226	2708.83	450000	1208.83	1208.83		2708.83	450000	2708.83	2663.97	2743.7	2771.49	2771.49	450000	450000	450000	450000	450000
525	0.164017	0.164308	0.164163	0.930863	0.000728669	2712.67	450000	1212.67	1212.67		2712.67	450000	2712.67	2669.5	2745.96	2774.32	2774.32	450000	450000	450000	450000	450000
526	0.164308	0.1646	0.164454	0.931585	0.000722156	2716.51	450000	1216.51	1216.51		2716.51	450000	2716.51	2675.04	2748.22	2777.14	2777.14	450000	450000	450000	450000	450000
527	0.1646	0.164892	0.164746	0.9323	0.000715686	2720.35	450000	1220.35	1220.35		2720.35	450000	2720.35	2680.59	2750.47	2779.96	2779.96	450000	450000	450000	450000	450000
528	0.164892	0.165184	0.165038	0.93301	0.00070926	2724.19	450000	1224.19	1224.19		2724.19	450000	2724.19	2686.15	2752.72	2782.77	2782.77	450000	450000	450000	450000	450000
529	0.165184	0.165476	0.16533	0.933713	0.000702878	2728.03	450000	1228.03	1228.03		2728.03	450000	2728.03	2691.72	2754.96	2785.58	2785.58	450000	450000	450000	450000	450000
530	0.165476	0.165768	0.165622	0.934409	0.000696539	2731.87	450000	1231.87	1231.87		2731.87	450000	2731.87	2697.31	2757.2	2788.38	2788.38	450000	450000	450000	450000	450000
531	0.165768	0.16606	0.165914	0.935099	0.000690244	2735.71	450000	1235.71	1235.71		2735.71	450000	2735.71	2702.9	2759.44	2791.17	2791.17	450000	450000	450000	450000	450000
532	0.16606	0.166351	0.166206	0.935783	0.000683992	2739.55	450000	1239.55	1239.55		2739.55	450000	2739.55	2708.51	2761.67	2793.96	2793.96	450000	450000	450000	450000	450000
533	0.166351	0.166643	0.166497	0.936461	0.000677782	2743.39	450000	1243.39	1243.39		2743.39	450000	2743.39	2714.13	2763.9	2796.74	2796.74	450000	450000	450000	450000	450000
534	0.166643	0.166935	0.166789	0.937133	0.000671616	2747.23	450000	1247.23	1247.23		2747.23	450000	2747.23	2719.76	2766.13	2799.52	2799.52	450000	450000	450000	450000	450000
535	0.166935	0.167227	0.167081	0.937798	0.000665493	2751.07	450000	1251.07	1251.07		2751.07	450000	2751.07	2725.4	2768.35	2802.29	2802.29	450000	450000	450000	450000	450000
536	0.167227	0.167519	0.167373	0.938458	0.000659413	2754.91	450000	1254.91	1254.91		2754.91	450000	2754.91	2731.06	2770.56	2805.05	2805.05	450000	450000	450000	450000	450000
537	0.167519	0.167811	0.167665	0.939111	0.000653375	2758.75	450000	1258.75	1258.75		2758.75	450000	2758.75	2736.72	2772.78	2807.8	2807.8	450000	450000	450000	450000	450000
538	0.167811	0.168103	0.167957	0.939758	0.00064738	2762.59	450000	1262.59	1262.59		2762.59	450000	2762.59	2742.4	2774.99	2810.55	2810.55	450000	450000	450000	450000	450000
539	0.168103	0.168394	0.168248	0.9404	0.000641427	2766.43	450000	1266.43	1266.43		2766.43	450000	2766.43	2748.09	2777.19	2813.3	2813.3	450000	450000	450000	450000	450000
540	0.168394	0.168686	0.16854	0.941035	0.000635517	2770.27	450000	1270.27	1270.27		2770.27	450000	2770.27	2753.79	2779.39	2816.03	2816.03	450000	450000	450000	450000	450000
541	0.168686	0.168978	0.168832	0.941665	0.000629648	2774.11	450000	1274.11	1274.11		2774.11	450000	2774.11	2759.51	2781.59	2818.77	2818.77	450000	450000	450000	450000	450000
542	0.168978	0.16927	0.169124	0.942289	0.000623822	2777.95	450000	1277.95	1277.95		2777.95	450000	2777.95	2765.23	2783.79	2821.49	2821.49	450000	450000	450000	450000	450000
543	0.16927	0.169562	0.169416	0.942907	0.000618037	2781.79	450000	1281.79	1281.79		2781.79	450000	2781.79	2770.97	2785.98	2824.21	2824.21	450000	450000	450000	450000	450000
544	0.169562	0.169854	0.169708	0.943519	0.000612294	2785.63	450000	1285.63	1285.63		2785.63	450000	2785.63	2776.72	2788.16	2826.92	2826.92	450000	450000	450000	450000	450000
545	0.169854	0.170145	0.17	0.944126	0.000606593	2789.47	450000	1289.47	1289.47		2789.47	450000	2789.47	2782.48	2790.35	2829.63	2829.63	450000	450000	450000	450000	450000
546	0.170145	0.170437	0.170291	0.944727	0.000600933	2793.31	450000	1293.31	1293.31		2793.31	450000	2793.31	2788.25	2792.53	2832.32	2832.32	450000	450000	450000	450000	450000
547	0.170437	0.170729	0.170583	0.945322	0.000595315	2797.15	450000	1297.15	1297.15		2797.15	450000	2797.15	2794.04	2794.7	2835.02	2835.02	450000	450000	450000	450000	450000
548	0.170729	0.171021	0.170875	0.945912	0.000589738	2800.99	450000	1300.99	1300.99		2800.99	450000	2800.99	2799.83	2796.87	2837.7	2837.7	450000	450000	450000	450000	450000
549	0.171021	0.171313	0.171167	0.946496	0.000584202	2804.83	450000	1304.83	1304.83		2804.83	450000	2804.83	2805.64	2799.04	2840.38	2840.38	450000	450000	450000	450000	450000
550	0.171313	0.171605	0.171459	0.947075	0.000578706	2808.67	450000	1308.67	1308.67		2808.67	450000	2808.67	2811.46	2801.21	2843.06	2843.06	450000	450000	450000	450000	450000
551	0.171605	0.171897	0.171751	0.947648	0.000573251	2812.51	450000	1312.51	1312.51		2812.51	450000	2812.51	2817.3	2803.37	2845.73	2845.73	450000	450000	450000	450000	450000
552	0.171897	0.172188	0.172042	0.948216	0.000567837	2816.35	450000	1316.35	1316.35		2816.35	450000	2816.35	2823.14	2805.52	2848.39	2848.39	450000	450000	450000	450000	450000
553	0.172188	0.17248	0.172334	0.948778	0.000562464	2820.19	450000	1320.19	1320.19		2820.19	450000	2820.19	2829	2807.68	2851.04	2851.04	450000	450000	450000	450000	450000
554	0.17248	0.172772	0.172626	0.949335	0.00055713	2824.03	450000	1324.03	1324.03		2824.03	450000	2824.03	2834.87	2809.83	2853.69	2853.69	450000	450000	450000	450000	450000
555	0.172772	0.173064	0.172918	0.949887	0.000551837	2827.87	450000	1327.87	1327.87		2827.87	450000	2827.87	2840.75	2811.97	2856.33	2856.33	450000	450000	450000	450000	450000
556	0.173064	0.173356	0.17321	0.950434	0.000546583	2831.71	450000	1331.71	1331.71		2831.71	450000	2831.71	2846.64	2814.11	2858.97	2858.97	450000	450000	450000	450000	450000
557	0.173356	0.173648	0.173502	0.950975	0.00054137	2835.55	450000	1335.55	1335.55		2835.55	450000	2835.55	2852.55	2816.25	2861.6	2861.6	450000	450000	450000	450000	450000
558	0.173648	0.173939	0.173794	0.951511	0.000536196	2839.39	450000	1339.39	1339.39		2839.39	450000	2839.39	2858.47	2818.39	2864.22	2864.22	450000	450000	450000	450000	450000
559	0.173939	0.174231	0.174085	0.952042	0.000531061	2843.23	450000	1343.23	1343.23		2843.23	450000	2843.23	2864.4	2820.52	2866.84	2866.84	450000	450000	450000	450000	450000
560	0.174231	0.174523	0.174377	0.952568	0.000525966	2847.07	450000	1347.07	1347.07		2847.07	450000	2847.07	2870.34	2822.65	2869.45	2869.45	450000	450000	450000	450000	450000
561	0.174523	0.174815	0.174669	0.953089	0.000520909	2850.91	450000	1350.91	1350.91		2850.91	450000	2850.91	2876.29	2824.77	2872.05	2872.05	450000	450000	450000	450000	450000
562	0.174815	0.175107	0.174961	0.953605	0.000515892	2854.75	450000	1354.75	1354.75		2854.75	450000	2854.75	2882.26	2826.89	2874.65	2874.65	450000	450000	450000	450000	450000
563	0.175107	0.175399	0.175253	0.954116	0.000510914	2858.59	450000	1358.59	1358.59		2858.59	450000	2858.59	2888.24	2829.01	2877.24	2877.24	450000	450000	450000	450000	450000
564	0.175399	0.175691	0.175545	0.954622	0.000505974	2862.43	450000	1362.43	1362.43		2862.43	450000	2862.43	2894.23	2831.12	2879.83	2879.83	450000	450000	450000	450000	450000
565	0.175691	0.175982	0.175836	0.955123	0.000501072	2866.27	450000	1366.27	1366.27		2866.27	450000	2866.27	2900.24	2833.24	2882.41	2882.41	450000	450000	450000	450000	450000
566	0.175982	0.176274	0.176128	0.955619	0.000496209	2870.11	450000	1370.11	1370.11		2870.11	450000	2870.11	2906.26	2835.34	2884.98	2884.98	450000	450000	450000	450000	450000
567	0.176274	0.176566	0.17642	0.956111	0.000491384	2873.95	450000	1373.95	1373.95		2873.95	450000	2873.95	2912.29	2837.45	2887.55	2887.55	450000	450000	450000	450000	450000
568	0.176566	0.176858	0.176712	0.956597	0.000486597	2877.79	450000	1377.79	1377.79		2877.79	450000	2877.79	2918.33	2839.55	2890.11	2890.11	450000	450000	450000	450000	450000
569	0.176858	0.17715	0.177004	0.957079	0.000481847	2881.63	450000	1381.63	1381.63		2881.63	450000	2881.63	2924.38	2841.64	2892.66	2892.66	450000	450000	450000	450000	450000
570	0.17715	0.177442	0.177296	0.957556	0.000477135	2885.47	450000	1385.47	1385.47		2885.47	450000	2885.47	2930.45	2843.73	2895.21	2895.21	450000	450000	450000	450000	450000
571	0.177442	0.177733	0.177588	0.958029	0.000472461	2889.31	450000	1389.31	1389.31		2889.31	450000	2889.31	2936.53	2845.82	2897.75	2897.75	450000	450000	450000	450000	450000
572	0.177733	0.178025	0.177879	0.958497	0.000467823	2893.15	450000	1393.15	1393.15		2893.15	450000	2893.15	2942.62	2847.91	2900.29	2900.29	450000	450000	450000	450000	450000
573	0.178025	0.178317	0.178171	0.95896	0.000463223	2896.99	450000	1396.99	1396.99		2896.99	450000	2896.99	2948.73	2849.99	2902.82	2902.82	450000	450000	450000	450000	450000
574	0.178317	0.178609	0.178463	0.959418	0.00045866	2900.83	450000	1400.83	1400.83		2900.83	450000	2900.83	2954.85	2852.07	2905.34	2905.34	450000	450000	450000	450000	450000
575	0.178609	0.178901	0.178755	0.959873	0.000454133	2904.67	450000	1404.67	1404.67		2904.67	450000	2904.67	2960.98	2854.15	2907.85	2907.85	450000	450000	450000	450000	450000
576	0.178901	0.179193	0.179047	0.960322	0.000449643	2908.51	450000	1408.51	1408.51		2908.51	450000	2908.51	2967.12	2856.22	2910.36	2910.36	450000	450000	450000	450000	450000
577	0.179193	0.179485	0.179339	0.960767	0.000445189	2912.35	450000	1412.35	1412.35		2912.35	450000	2912.35	2973.27	2858.29	2912.87	2912.87	450000	450000	450000	450000	450000
578	0.179485	0.179776	0.17963	0.961208	0.000440771	2916.19	450000	1416.19	1416.19		2916.19	450000	2916.19	2979.44	2860.36	2915.37	2915.37	450000	450000	450000	450000	450000
579	0.179776	0.180068	0.179922	0.961645	0.000436389	2920.03	450000	1420.03	1420.03		2920.03	450000	2920.03	2985.62	2862.42	2917.86	2917.86	450000	450000	450000	450000	450000
580	0.180068	0.18036	0.180214	0.962077	0.000432043	2923.87	450000	1423.87	1423.87		2923.87	450000	2923.87	2991.82	2864.48	2920.34	2920.34	450000	450000	450000	450000	450000
581	0.18036	0.180652	0.180506	0.962504	0.000427732	2927.71	450000	1427.71	1427.71		2927.71	450000	2927.71	2998.03	2866.53	2922.82	2922.82	450000	450000	450000	450000	450000
582	0.180652	0.180944	0.180798	0.962928	0.000423457	2931.55	450000	1431.55	1431.55		2931.55	450000	2931.55	3004.25	2868.59	2925.29	2925.29	450000	450000	450000	450000	450000
583	0.180944	0.181236	0.18109	0.963347	0.000419217	2935.39	450000	1435.39	1435.39		2935.39	450000	2935.39	3010.48	2870.63	2927.76	2927.76	450000	450000	450000	450000	450000
584	0.181236	0.181527	0.181382	0.963762	0.000415012	2939.23	450000	1439.23	1439.23		2939.23	450000	2939.23	3016.73	2872.68	2930.22	2930.22	450000	450000	450000	450000	450000
585	0.181527	0.181819	0.181673	0.964173	0.000410842	2943.07	450000	1443.07	1443.07		2943.07	450000	2943.07	3022.98	2874.72	2932.67	2932.67	450000	450000	450000	450000	450000
586	0.181819	0.182111	0.181965	0.96458	0.000406706	2946.91	450000	1446.91	1446.91		2946.91	450000	2946.91	3029.26	2876.76	2935.12	2935.12	450000	450000	450000	450000	450000
587	0.182111	0.182403	0.182257	0.964982	0.000402605	2950.75	450000	1450.75	1450.75		2950.75	450000	2950.75	3035.54	2878.8	2937.56	2937.56	450000	450000	450000	450000	450000
588	0.182403	0.182695	0.182549	0.965381	0.000398539	2954.59	450000	1454.59	1454.59		2954.59	450000	2954.59	3041.84	2880.83	2939.99	2939.99	450000	450000	450000	450000	450000
589	0.182695	0.182987	0.182841	0.965775	0.000394506	2958.43	450000	1458.43	1458.43		2958.43	450000	2958.43	3048.15	2882.86	2942.42	2942.42	450000	450000	450000	450000	450000
590	0.182987	0.183279	0.183133	0.966166	0.000390507	2962.27	450000	1462.27	1462.27		2962.27	450000	2962.27	3054.47	2884.89	2944.84	2944.84	450000	450000	450000	450000	450000
591	0.183279	0.18357	0.183424	0.966552	0.000386542	2966.11	450000	1466.11	1466.11		2966.11	450000	2966.11	3060.81	2886.91	2947.26	2947.26	450000	450000	450000	450000	450000
592	0.18357	0.183862	0.183716	0.966935	0.00038261	2969.95	450000	1469.95	1469.95		2969.95	450000	2969.95	3067.16	2888.93	2949.66	2949.66	450000	450000	450000	450000	450000
593	0.183862	0.184154	0.184008	0.967314	0.000378712	2973.79	450000	1473.79	1473.79		2973.79	450000	2973.79	3073.52	2890.95	2952.07	2952.07	450000	450000	450000	450000	450000
594	0.184154	0.184446	0.1843	0.967688	0.000374846	2977.63	450000	1477.63	1477.63		2977.63	450000	2977.63	3079.9	2892.96	2954.46	2954.46	450000	450000	450000	450000	450000
595	0.184446	0.184738	0.184592	0.968059	0.000371014	2981.47	450000	1481.47	1481.47		2981.47	450000	2981.47	3086.29	2894.97	2956.85	2956.85	450000	450000	450000	450000	450000
596	0.184738	0.18503	0.184884	0.968427	0.000367214	2985.31	450000	1485.31	1485.31		2985.31	450000	2985.31	3092.69	2896.98	2959.24	2959.24	450000	450000	450000	450000	450000
597	0.18503	0.185321	0.185176	0.96879	0.000363447	2989.15	450000	1489.15	1489.15		2989.15	450000	2989.15	3099.11	2898.98	2961.61	2961.61	450000	450000	450000	450000	450000
598	0.185321	0.185613	0.185467	0.96915	0.000359712	2992.99	450000	1492.99	1492.99		2992.99	450000	2992.99	3105.54	2900.98	2963.99	2963.99	450000	450000	450000	450000	450000
599	0.185613	0.185905	0.185759	0.969506	0.00035601	2996.83	450000	1496.83	1496.83		2996.83	450000	2996.83	3111.98	2902.98	2966.35	2966.35	450000	450000	450000	450000	450000
600	0.185905	0.186197	0.186051	0.969858	0.000352339	3000.67	450000	1500.67	1500.67		3000.67	450000	3000.67	3118.44	2904.97	2968.71	2968.71	450000	450000	450000	450000	450000
601	0.186197	0.186489	0.186343	0.970207	0.000348701	3004.51	450000	1504.51	1504.51		3004.51	450000	3004.51	3124.91	2906.96	2971.06	2971.06	450000	450000	450000	450000	450000
602	0.186489	0.186781	0.186635	0.970552	0.000345093	3008.35	450000	1508.35	1508.35		3008.35	450000	3008.35	3131.39	2908.95	2973.41	2973.41	450000	450000	450000	450000	450000
603	0.186781	0.187073	0.186927	0.970893	0.000341517	3012.19	450000	1512.19	1512.19		3012.19	450000	3012.19	3137.89	2910.94	2975.75	2975.75	450000	450000	450000	450000	450000
604	0.187073	0.187364	0.187219	0.971231	0.000337973	3016.03	450000	1516.03	1516.03		3016.03	450000	3016.03	3144.4	2912.92	2978.08	2978.08	450000	450000	450000	450000	450000
605	0.187364	0.187656	0.18751	0.971566	0.000334459	3019.87	450000	1519.87	1519.87		3019.87	450000	3019.87	3150.92	2914.9	2980.41	2980.41	450000	450000	450000	450000	450000
606	0.187656	0.187948	0.187802	0.971897	0.000330976	3023.71	450000	1523.71	1523.71		3023.71	450000	3023.71	3157.46	2916.87	2982.73	2982.73	450000	450000	450000	450000	450000
607	0.187948	0.18824	0.188094	0.972224	0.000327524	3027.55	450000	1527.55	1527.55		3027.55	450000	3027.55	3164.01	2918.85	2985.04	2985.04	450000	450000	450000	450000	450000
608	0.18824	0.188532	0.188386	0.972549	0.000324103	3031.39	450000	1531.39	1531.39		3031.39	450000	3031.39	3170.58	2920.82	2987.35	2987.35	450000	450000	450000	450000	450000
609	0.188532	0.188824	0.188678	0.972869	0.000320711	3035.23	450000	1535.23	1535.23		3035.23	450000	3035.23	3177.15	2922.78	2989.65	2989.65	450000	450000	450000	450000	450000
610	0.188824	0.189116	0.18897	0.973187	0.00031735	3039.07	450000	1539.07	1539.07		3039.07	450000	3039.07	3183.75	2924.75	2991.95	2991.95	450000	450000	450000	450000	450000
611	0.189116	0.189407	0.189261	0.973501	0.000314018	3042.91	450000	1542.91	1542.91		3042.91	450000	3042.91	3190.35	2926.71	2994.24	2994.24	450000	450000	450000	450000	450000
612	0.189407	0.189699	0.189553	0.973811	0.000310716	3046.75	450000	1546.75	1546.75		3046.75	450000	3046.75	3196.97	2928.67	2996.52	2996.52	450000	450000	450000	450000	450000
613	0.189699	0.189991	0.189845	0.974119	0.000307444	3050.59	450000	1550.59	1550.59		3050.59	450000	3050.59	3203.6	2930.62	2998.79	2998.79	450000	450000	450000	450000	450000
614	0.189991	0.190283	0.190137	0.974423	0.000304201	3054.43	450000	1554.43	1554.43		3054.43	450000	3054.43	3210.25	2932.57	3001.06	3001.06	450000	450000	450000	450000	450000
615	0.190283	0.190575	0.190429	0.974724	0.000300986	3058.27	450000	1558.27	1558.27		3058.27	450000	3058.27	3216.91	2934.52	3003.33	3003.33	450000	450000	450000	450000	450000
616	0.190575	0.190867	0.190721	0.975022	0.000297801	3062.11	450000	1562.11	1562.11		3062.11	450000	3062.11	3223.58	2936.47	3005.59	3005.59	450000	450000	450000	450000	450000
617	0.190867	0.191158	0.191013	0.975316	0.000294645	3065.95	450000	1565.95	1565.95		3065.95	450000	3065.95	3230.27	2938.41	3007.84	3007.84	450000	450000	450000	450000	450000
618	0.191158	0.19145	0.191304	0.975608	0.000291517	3069.79	450000	1569.79	1569.79		3069.79	450000	3069.79	3236.97	2940.35	3010.08	3010.08	450000	450000	450000	450000	450000
619	0.19145	0.191742	0.191596	0.975896	0.000288417	3073.63	450000	1573.63	1573.63		3073.63	450000	3073.63	3243.69	2942.28	3012.32	3012.32	450000	450000	450000	450000	450000
620	0.191742	0.192034	0.191888	0.976182	0.000285346	3077.47	450000	1577.47	1577.47		3077.47	450000	3077.47	3250.42	2944.22	3014.55	3014.55	450000	450000	450000	450000	450000
621	0.192034	0.192326	0.19218	0.976464	0.000282303	3081.31	450000	1581.31	1581.31		3081.31	450000	3081.31	3257.16	2946.15	3016.78	3016.78	450000	450000	450000	450000	450000
622	0.192326	0.192618	0.192472	0.976743	0.000279287	3085.15	450000	1585.15	1585.15		3085.15	450000	3085.15	3263.92	2948.08	3019	3019	450000	450000	450000	450000	450000
623	0.192618	0.19291	0.192764	0.97702	0.000276299	3088.99	450000	1588.99	1588.99		3088.99	450000	3088.99	3270.69	2950	3021.21	3021.21	450000	450000	450000	450000	450000
624	0.19291	0.193201	0.193055	0.977293	0.000273338	3092.83	450000	1592.83	1592.83		3092.83	450000	3092.83	3277.48	2951.92	3023.42	3023.42	450000	450000	450000	450000	450000
625	0.193201	0.193493	0.193347	0.977563	0.000270405	3096.67	450000	1596.67	1596.67		3096.67	450000	3096.67	3284.28	2953.84	3025.62	3025.62	450000	450000	450000	450000	450000
626	0.193493	0.193785	0.193639	0.977831	0.000267498	3100.52	450000	1600.52	1600.52		3100.52	450000	3100.52	3291.09	2955.76	3027.81	3027.81	450000	450000	450000	450000	450000
627	0.193785	0.194077	0.193931	0.978095	0.000264619	3104.36	450000	1604.36	1604.36		3104.36	450000	3104.36	3297.92	2957.67	3030	3030	450000	450000	450000	450000	450000
628	0.194077	0.194369	0.194223	0.978357	0.000261766	3108.2	450000	1608.2	1608.2		3108.2	450000	3108.2	3304.76	2959.58	3032.18	3032.18	450000	450000	450000	450000	450000
629	0.194369	0.194661	0.194515	0.978616	0.000258939	3112.04	450000	1612.04	1612.04		3112.04	450000	3112.04	3311.62	2961.49	3034.36	3034.36	450000	450000	450000	450000	450000
630	0.194661	0.194952	0.194807	0.978872	0.000256139	3115.88	450000	1615.88	1615.88		3115.88	450000	3115.88	3318.49	2963.4	3036.53	3036.53	450000	450000	450000	450000	450000
631	0.194952	0.195244	0.195098	0.979126	0.000253365	3119.72	450000	1619.72	1619.72		3119.72	450000	3119.72	3325.37	2965.3	3038.69	3038.69	450000	450000	450000	450000	450000
632	0.195244	0.195536	0.19539	0.979376	0.000250616	3123.56	450000	1623.56	1623.56		3123.56	450000	3123.56	3332.27	2967.2	3040.85	3040.85	450000	450000	450000	450000	450000
633	0.195536	0.195828	0.195682	0.979624	0.000247894	3127.4	450000	1627.4	1627.4		3127.4	450000	3127.4	3339.19	2969.09	3043	3043	450000	450000	450000	450000	450000
634	0.195828	0.19612	0.195974	0.979869	0.000245197	3131.24	450000	1631.24	1631.24		3131.24	450000	3131.24	3346.12	2970.99	3045.14	3045.14	450000	450000	450000	450000	450000
635	0.19612	0.196412	0.196266	0.980112	0.000242525	3135.08	450000	1635.08	1635.08		3135.08	450000	3135.08	3353.06	2972.88	3047.28	3047.28	450000	450000	450000	450000	450000
636	0.196412	0.196704	0.196558	0.980352	0.000239879	3138.92	450000	1638.92	1638.92		3138.92	450000	3138.92	3360.01	2974.76	3049.41	3049.41	450000	450000	450000	450000	450000
637	0.196704	0.196995	0.196849	0.980589	0.000237257	3142.76	450000	1642.76	1642.76		3142.76	450000	3142.76	3366.99	2976.65	3051.54	3051.54	450000	450000	450000	450000	450000
638	0.196995	0.197287	0.197141	0.980824	0.00023466	3146.6	450000	1646.6	1646.6		3146.6	450000	3146.6	3373.97	2978.53	3053.65	3053.65	450000	450000	450000	450000	450000
639	0.197287	0.197579	0.197433	0.981056	0.000232088	3150.44	450000	1650.44	1650.44		3150.44	450000	3150.44	3380.97	2980.41	3055.77	3055.77	450000	450000	450000	450000	450000
640	0.197579	0.197871	0.197725	0.981285	0.000229541	3154.28	450000	1654.28	1654.28		3154.28	450000	3154.28	3387.99	2982.29	3057.87	3057.87	450000	450000	450000	450000	450000
641	0.197871	0.198163	0.198017	0.981512	0.000227017	3158.12	450000	1658.12	1658.12		3158.12	450000	3158.12	3395.01	2984.16	3059.97	3059.97	450000	450000	450000	450000	450000
642	0.198163	0.198455	0.198309	0.981737	0.000224518	3161.96	450000	1661.96	1661.96		3161.96	450000	3161.96	3402.06	2986.03	3062.07	3062.07	450000	450000	450000	450000	450000
643	0.198455	0.198746	0.198601	0.981959	0.000222043	3165.8	450000	1665.8	1665.8		3165.8	450000	3165.8	3409.12	2987.9	3064.15	3064.15	450000	450000	450000	450000	450000
644	0.198746	0.199038	0.198892	0.982178	0.000219591	3169.64	450000	1669.64	1669.64		3169.64	450000	3169.64	3416.19	2989.77	3066.23	3066.23	450000	450000	450000	450000	450000
645	0.199038	0.19933	0.199184	0.982396	0.000217163	3173.48	450000	1673.48	1673.48		3173.48	450000	3173.48	3423.28	2991.63	3068.31	3068.31	450000	450000	450000	450000	450000
646	0.19933	0.199622	0.199476	0.98261	0.000214758	3177.32	450000	1677.32	1677.32		3177.32	450000	3177.32	3430.38	2993.49	3070.38	3070.38	450000	450000	450000	450000	450000
647	0.199622	0.199914	0.199768	0.982823	0.000212376	3181.16	450000	1681.16	1681.16		3181.16	450000	3181.16	3437.5	2995.35	3072.44	3072.44	450000	450000	450000	450000	450000
648	0.199914	0.200206	0.20006	0.983033	0.000210018	3185	450000	1685	1685		3185	450000	3185	3444.63	2997.2	3074.49	3074.49	450000	450000	450000	450000	450000
649	0.200206	0.200498	0.200352	0.98324	0.000207682	3188.84	450000	1688.84	1688.84		3188.84	450000	3188.84	3451.77	2999.05	3076.54	3076.54	450000	450000	450000	450000	450000
650	0.200498	0.200789	0.200643	0.983446	0.000205369	3192.68	450000	1692.68	1692.68		3192.68	450000	3192.68	3458.94	3000.9	3078.59	3078.59	450000	450000	450000	450000	450000
651	0.200789	0.201081	0.200935	0.983649	0.000203079	3196.52	450000	1696.52	1696.52		3196.52	450000	3196.52	3466.11	3002.75	3080.62	3080.62	450000	450000	450000	450000	450000
652	0.201081	0.201373	0.201227	0.98385	0.000200811	3200.36	450000	1700.36	1700.36		3200.36	450000	3200.36	3473.3	3004.59	3082.65	3082.65	450000	450000	450000	450000	450000
653	0.201373	0.201665	0.201519	0.984048	0.000198565	3204.2	450000	1704.2	1704.2		3204.2	450000	3204.2	3480.51	3006.43	3084.68	3084.68	450000	450000	450000	450000	450000
654	0.201665	0.201957	0.201811	0.984245	0.00019634	3208.04	450000	1708.04	1708.04		3208.04	450000	3208.04	3487.73	3008.27	3086.7	3086.7	450000	450000	450000	450000	450000
655	0.201957	0.202249	0.202103	0.984439	0.000194138	3211.88	450000	1711.88	1711.88		3211.88	450000	3211.88	3494.97	3010.11	3088.71	3088.71	450000	450000	450000	450000	450000
656	0.202249	0.20254	0.202395	0.984631	0.000191958	3215.72	450000	1715.72	1715.72		3215.72	450000	3215.72	3502.22	3011.94	3090.71	3090.71	450000	450000	450000	450000	450000
657	0.20254	0.202832	0.202686	0.984821	0.000189799	3219.56	450000	1719.56	1719.56		3219.56	450000	3219.56	3509.48	3013.77	3092.71	3092.71	450000	450000	450000	450000	450000
658	0.202832	0.203124	0.202978	0.985008	0.000187661	3223.4	450000	1723.4	1723.4		3223.4	450000	3223.4	3516.77	3015.6	3094.7	3094.7	450000	450000	450000	450000	450000
659	0.203124	0.203416	0.20327	0.985194	0.000185544	3227.24	450000	1727.24	1727.24		3227.24	450000	3227.24	3524.06	3017.43	3096.69	3096.69	450000	450000	450000	450000	450000
660	0.203416	0.203708	0.203562	0.985377	0.000183448	3231.08	450000	1731.08	1731.08		3231.08	450000	3231.08	3531.37	3019.25	3098.67	3098.67	450000	450000	450000	450000	450000
661	0.203708	0.204	0.203854	0.985559	0.000181373	3234.92	450000	1734.92	1734.92		3234.92	450000	3234.92	3538.7	3021.07	3100.64	3100.64	450000	450000	450000	450000	450000
662	0.204	0.204292	0.204146	0.985738	0.000179319	3238.76	450000	1738.76	1738.76		3238.76	450000	3238.76	3546.04	3022.89	3102.61	3102.61	450000	450000	450000	450000	450000
663	0.204292	0.204583	0.204437	0.985915	0.000177285	3242.6	450000	1742.6	1742.6		3242.6	450000	3242.6	3553.4	3024.7	3104.57	3104.57	450000	450000	450000	450000	450000
664	0.204583	0.204875	0.204729	0.98609	0.000175272	3246.44	450000	1746.44	1746.44		3246.44	450000	3246.44	3560.77	3026.51	3106.53	3106.53	450000	450000	450000	450000	450000
665	0.204875	0.205167	0.205021	0.986264	0.000173278	3250.28	450000	1750.28	1750.28		3250.28	450000	3250.28	3568.16	3028.32	3108.47	3108.47	450000	450000	450000	450000	450000
666	0.205167	0.205459	0.205313	0.986435	0.000171305	3254.12	450000	1754.12	1754.12		3254.12	450000	3254.12	3575.56	3030.13	3110.42	3110.42	450000	450000	450000	450000	450000
667	0.205459	0.205751	0.205605	0.986604	0.000169351	3257.96	450000	1757.96	1757.96		3257.96	450000	3257.96	3582.98	3031.93	3112.35	3112.35	450000	450000	450000	450000	450000
668	0.205751	0.206043	0.205897	0.986772	0.000167417	3261.8	450000	1761.8	1761.8		3261.8	450000	3261.8	3590.41	3033.74	3114.28	3114.28	450000	450000	450000	450000	450000
669	0.206043	0.206334	0.206189	0.986937	0.000165503	3265.64	450000	1765.64	1765.64		3265.64	450000	3265.64	3597.86	3035.54	3116.2	3116.2	450000	450000	450000	450000	450000
670	0.206334	0.206626	0.20648	0.987101	0.000163608	3269.48	450000	1769.48	1769.48		3269.48	450000	3269.48	3605.33	3037.33	3118.12	3118.12	450000	450000	450000	450000	450000
671	0.206626	0.206918	0.206772	0.987263	0.000161732	3273.32	450000	1773.32	1773.32		3273.32	450000	3273.32	3612.81	3039.13	3120.03	3120.03	450000	450000	450000	450000	450000
672	0.206918	0.20721	0.207064	0.987422	0.000159875	3277.16	450000	1777.16	1777.16		3277.16	450000	3277.16	3620.3	3040.92	3121.94	3121.94	450000	450000	450000	450000	450000
673	0.20721	0.207502	0.207356	0.987581	0.000158037	3281	450000	1781	1781		3281	450000	3281	3627.81	3042.71	3123.83	3123.83	450000	450000	450000	450000	450000
674	0.207502	0.207794	0.207648	0.987737	0.000156217	3284.84	450000	1784.84	1784.84		3284.84	450000	3284.84	3635.34	3044.5	3125.73	3125.73	450000	450000	450000	450000	450000
675	0.207794	0.208086	0.20794	0.987891	0.000154416	3288.68	450000	1788.68	1788.68		3288.68	450000	3288.68	3642.88	3046.28	3127.61	3127.61	450000	450000	450000	450000	450000
676	0.208086	0.208377	0.208232	0.988044	0.000152634	3292.52	450000	1792.52	1792.52		3292.52	450000	3292.52	3650.44	3048.06	3129.49	3129.49	450000	450000	450000	450000	450000
677	0.208377	0.208669	0.208523	0.988195	0.00015087	3296.36	450000	1796.36	1796.36		3296.36	450000	3296.36	3658.01	3049.84	3131.36	3131.36	450000	450000	450000	450000	450000
678	0.208669	0.208961	0.208815	0.988344	0.000149124	3300.2	450000	1800.2	1800.2		3300.2	450000	3300.2	3665.6	3051.62	3133.23	3133.23	450000	450000	450000	450000	450000
679	0.208961	0.209253	0.209107	0.988491	0.000147395	3304.04	450000	1804.04	1804.04		3304.04	450000	3304.04	3673.21	3053.39	3135.09	3135.09	450000	450000	450000	450000	450000
680	0.209253	0.209545	0.209399	0.988637	0.000145685	3307.88	450000	1807.88	1807.88		3307.88	450000	3307.88	3680.83	3055.16	3136.94	3136.94	450000	450000	450000	450000	450000
681	0.209545	0.209837	0.209691	0.988781	0.000143992	3311.72	450000	1811.72	1811.72		3311.72	450000	3311.72	3688.47	3056.93	3138.79	3138.79	450000	450000	450000	450000	450000
682	0.209837	0.210129	0.209983	0.988923	0.000142317	3315.56	450000	1815.56	1815.56		3315.56	450000	3315.56	3696.12	3058.7	3140.63	3140.63	450000	450000	450000	450000	450000
683	0.210129	0.21042	0.210274	0.989064	0.000140659	3319.4	450000	1819.4	1819.4		3319.4	450000	3319.4	3703.79	3060.47	3142.47	3142.47	450000	450000	450000	450000	450000
684	0.21042	0.210712	0.210566	0.989203	0.000139018	3323.24	450000	1823.24	1823.24		3323.24	450000	3323.24	3711.47	3062.23	3144.29	3144.29	450000	450000	450000	450000	450000
685	0.210712	0.211004	0.210858	0.98934	0.000137394	3327.08	450000	1827.08	1827.08		3327.08	450000	3327.08	3719.17	3063.99	3146.12	3146.12	450000	450000	450000	450000	450000
686	0.211004	0.211296	0.21115	0.989476	0.000135787	3330.92	450000	1830.92	1830.92		3330.92	450000	3330.92	3726.89	3065.74	3147.93	3147.93	450000	450000	450000	450000	450000
687	0.211296	0.211588	0.211442	0.98961	0.000134197	3334.76	450000	1834.76	1834.76		3334.76	450000	3334.76	3734.62	3067.5	3149.74	3149.74	450000	450000	450000	450000	450000
688	0.211588	0.21188	0.211734	0.989743	0.000132624	3338.6	450000	1838.6	1838.6		3338.6	450000	3338.6	3742.37	3069.25	3151.55	3151.55	450000	450000	450000	450000	450000
689	0.21188	0.212171	0.212026	0.989874	0.000131066	3342.44	450000	1842.44	1842.44		3342.44	450000	3342.44	3750.13	3071	3153.34	3153.34	450000	450000	450000	450000	450000
690	0.212171	0.212463	0.212317	0.990003	0.000129526	3346.28	450000	1846.28	1846.28		3346.28	450000	3346.28	3757.91	3072.75	3155.13	3155.13	450000	450000	450000	450000	450000
691	0.212463	0.212755	0.212609	0.990131	0.000128001	3350.12	450000	1850.12	1850.12		3350.12	450000	3350.12	3765.71	3074.49	3156.92	3156.92	450000	450000	450000	450000	450000
692	0.212755	0.213047	0.212901	0.990258	0.000126492	3353.96	450000	1853.96	1853.96		3353.96	450000	3353.96	3773.52	3076.24	3158.69	3158.69	450000	450000	450000	450000	450000
693	0.213047	0.213339	0.213193	0.990383	0.000125	3357.8	450000	1857.8	1857.8		3357.8	450000	3357.8	3781.35	3077.98	3160.47	3160.47	450000	450000	450000	450000	450000
694	0.213339	0.213631	0.213485	0.990506	0.000123523	3361.64	450000	1861.64	1861.64		3361.64	450000	3361.64	3789.2	3079.71	3162.23	3162.23	450000	450000	450000	450000	450000
695	0.213631	0.213923	0.213777	0.990629	0.000122061	3365.48	450000	1865.48	1865.48		3365.48	450000	3365.48	3797.06	3081.45	3163.99	3163.99	450000	450000	450000	450000	450000
696	0.213923	0.214214	0.214068	0.990749	0.000120615	3369.32	450000	1869.32	1869.32		3369.32	450000	3369.32	3804.94	3083.18	3165.74	3165.74	450000	450000	450000	450000	450000
697	0.214214	0.214506	0.21436	0.990868	0.000119185	3373.16	450000	1873.16	1873.16		3373.16	450000	3373.16	3812.83	3084.91	3167.49	3167.49	450000	450000	450000	450000	450000
698	0.214506	0.214798	0.214652	0.990986	0.000117769	3377	450000	1877	1877		3377	450000	3377	3820.74	3086.64	3169.23	3169.23	450000	450000	450000	450000	450000
699	0.214798	0.21509	0.214944	0.991102	0.000116369	3380.84	450000	1880.84	1880.84		3380.84	450000	3380.84	3828.67	3088.37	3170.96	3170.96	450000	450000	450000	450000	450000
700	0.21509	0.215382	0.215236	0.991217	0.000114983	3384.68	450000	1884.68	1884.68		3384.68	450000	3384.68	3836.61	3090.09	3172.69	3172.69	450000	450000	450000	450000	450000
701	0.215382	0.215674	0.215528	0.991331	0.000113613	3388.52	450000	1888.52	1888.52		3388.52	450000	3388.52	3844.57	3091.81	3174.41	3174.41	450000	450000	450000	450000	450000
702	0.215674	0.215965	0.21582	0.991443	0.000112257	3392.36	450000	1892.36	1892.36		3392.36	450000	3392.36	3852.55	3093.53	3176.13	3176.13	450000	450000	450000	450000	450000
703	0.215965	0.216257	0.216111	0.991554	0.000110915	3396.2	450000	1896.2	1896.2		3396.2	450000	3396.2	3860.54	3095.25	3177.84	3177.84	450000	450000	450000	450000	450000
704	0.216257	0.216549	0.216403	0.991664	0.000109588	3400.04	450000	1900.04	1900.04		3400.04	450000	3400.04	3868.55	3096.96	3179.54	3179.54	450000	450000	450000	450000	450000
705	0.216549	0.216841	0.216695	0.991772	0.000108275	3403.88	450000	1903.88	1903.88		3403.88	450000	3403.88	3876.58	3098.68	3181.23	3181.23	450000	450000	450000	450000	450000
706	0.216841	0.217133	0.216987	0.991879	0.000106976	3407.72	450000	1907.72	1907.72		3407.72	450000	3407.72	3884.62	3100.39	3182.92	3182.92	450000	450000	450000	450000	450000
707	0.217133	0.217425	0.217279	0.991985	0.000105692	3411.56	450000	1911.56	1911.56		3411.56	450000	3411.56	3892.68	3102.09	3184.61	3184.61	450000	450000	450000	450000	450000
708	0.217425	0.217717	0.217571	0.992089	0.000104421	3415.4	450000	1915.4	1915.4		3415.4	450000	3415.4	3900.75	3103.8	3186.28	3186.28	450000	450000	450000	450000	450000
709	0.217717	0.218008	0.217862	0.992192	0.000103164	3419.24	450000	1919.24	1919.24		3419.24	450000	3419.24	3908.85	3105.5	3187.96	3187.96	450000	450000	450000	450000	450000
710	0.218008	0.2183	0.218154	0.992294	0.00010192	3423.08	450000	1923.08	1923.08		3423.08	450000	3423.08	3916.96	3107.2	3189.62	3189.62	450000	450000	450000	450000	450000
711	0.2183	0.218592	0.218446	0.992395	0.00010069	3426.92	450000	1926.92	1926.92		3426.92	450000	3426.92	3925.08	3108.9	3191.28	3191.28	450000	450000	450000	450000	450000
712	0.218592	0.218884	0.218738	0.992494	9.94734e-05	3430.76	450000	1930.76	1930.76		3430.76	450000	3430.76	3933.23	3110.6	3192.93	3192.93	450000	450000	450000	450000	450000
713	0.218884	0.219176	0.21903	0.992593	9.827e-05	3434.6	450000	1934.6	1934.6		3434.6	450000	3434.6	3941.39	3112.29	3194.58	3194.58	450000	450000	450000	450000	450000
714	0.219176	0.219468	0.219322	0.99269	9.70797e-05	3438.44	450000	1938.44	1938.44		3438.44	450000	3438.44	3949.56	3113.98	3196.21	3196.21	450000	450000	450000	450000	450000
715	0.219468	0.219759	0.219614	0.992786	9.59024e-05	3442.28	450000	1942.28	1942.28		3442.28	450000	3442.28	3957.76	3115.67	3197.85	3197.85	450000	450000	450000	450000	450000
716	0.219759	0.220051	0.219905	0.99288	9.47379e-05	3446.12	450000	1946.12	1946.12		3446.12	450000	3446.12	3965.97	3117.36	3199.47	3199.47	450000	450000	450000	450000	450000
717	0.220051	0.220343	0.220197	0.992974	9.35863e-05	3449.96	450000	1949.96	1949.96		3449.96	450000	3449.96	3974.2	3119.05	3201.09	3201.09	450000	450000	450000	450000	450000
718	0.220343	0.220635	0.220489	0.993066	9.24472e-05	3453.8	450000	1953.8	1953.8		3453.8	450000	3453.8	3982.44	3120.73	3202.71	3202.71	450000	450000	450000	450000	450000
719	0.220635	0.220927	0.220781	0.993158	9.13207e-05	3457.64	450000	1957.64	1957.64		3457.64	450000	3457.64	3990.71	3122.41	3204.32	3204.32	450000	450000	450000	450000	450000
720	0.220927	0.221219	0.221073	0.993248	9.02066e-05	3461.48	450000	1961.48	1961.48		3461.48	450000	3461.48	3998.98	3124.09	3205.92	3205.92	450000	450000	450000	450000	450000
721	0.221219	0.221511	0.221365	0.993337	8.91047e-05	3465.32	450000	1965.32	1965.32		3465.32	450000	3465.32	4007.28	3125.76	3207.51	3207.51	450000	450000	450000	450000	450000
722	0.221511	0.221802	0.221656	0.993425	8.8015e-05	3469.16	450000	1969.16	1969.16		3469.16	450000	3469.16	4015.6	3127.44	3209.1	3209.1	450000	450000	450000	450000	450000
723	0.221802	0.222094	0.221948	0.993512	8.69374e-05	3473	450000	1973	1973		3473	450000	3473	4023.93	3129.11	3210.68	3210.68	450000	450000	450000	450000	450000
724	0.222094	0.222386	0.22224	0.993598	8.58717e-05	3476.84	450000	1976.84	1976.84		3476.84	450000	3476.84	4032.28	3130.78	3212.26	3212.26	450000	450000	450000	450000	450000
725	0.222386	0.222678	0.222532	0.993683	8.48178e-05	3480.68	450000	1980.68	1980.68		3480.68	450000	3480.68	4040.64	3132.45	3213.83	3213.83	450000	450000	450000	450000	450000
726	0.222678	0.22297	0.222824	0.993766	8.37756e-05	3484.52	450000	1984.52	1984.52		3484.52	450000	3484.52	4049.02	3134.11	3215.39	3215.39	450000	450000	450000	450000	450000
727	0.22297	0.223262	0.223116	0.993849	8.27451e-05	3488.36	450000	1988.36	1988.36		3488.36	450000	3488.36	4057.42	3135.77	3216.95	3216.95	450000	450000	450000	450000	450000
728	0.223262	0.223553	0.223408	0.993931	8.1726e-05	3492.2	450000	1992.2	1992.2		3492.2	450000	3492.2	4065.84	3137.43	3218.5	3218.5	450000	450000	450000	450000	450000
729	0.223553	0.223845	0.223699	0.994012	8.07182e-05	3496.04	450000	1996.04	1996.04		3496.04	450000	3496.04	4074.28	3139.09	3220.05	3220.05	450000	450000	450000	450000	450000
730	0.223845	0.224137	0.223991	0.994091	7.97218e-05	3499.88	450000	1999.88	1999.88		3499.88	450000	3499.88	4082.73	3140.75	3221.58	3221.58	450000	450000	450000	450000	450000
731	0.224137	0.224429	0.224283	0.99417	7.87365e-05	3503.73	450000	2003.73	2003.73		3503.73	450000	3503.73	4091.2	3142.4	3223.12	3223.12	450000	450000	450000	450000	450000
732	0.224429	0.224721	0.224575	0.994248	7.77622e-05	3507.57	450000	2007.57	2007.57		3507.57	450000	3507.57	4099.69	3144.06	3224.64	3224.64	450000	450000	450000	450000	450000
733	0.224721	0.225013	0.224867	0.994325	7.67989e-05	3511.41	450000	2011.41	2011.41		3511.41	450000	3511.41	4108.2	3145.71	3226.16	3226.16	450000	450000	450000	450000	450000
734	0.225013	0.225305	0.225159	0.994401	7.58464e-05	3515.25	450000	2015.25	2015.25		3515.25	450000	3515.25	4116.72	3147.35	3227.67	3227.67	450000	450000	450000	450000	450000
735	0.225305	0.225596	0.22545	0.994475	7.49046e-05	3519.09	450000	2019.09	2019.09		3519.09	450000	3519.09	4125.26	3149	3229.18	3229.18	450000	450000	450000	450000	450000
736	0.225596	0.225888	0.225742	0.994549	7.39735e-05	3522.93	450000	2022.93	2022.93		3522.93	450000	3522.93	4133.82	3150.64	3230.68	3230.68	450000	450000	450000	450000	450000
737	0.225888	0.22618	0.226034	0.994622	7.30529e-05	3526.77	450000	2026.77	2026.77		3526.77	450000	3526.77	4142.4	3152.28	3232.17	3232.17	450000	450000	450000	450000	450000
738	0.22618	0.226472	0.226326	0.994695	7.21427e-05	3530.61	450000	2030.61	2030.61		3530.61	450000	3530.61	4150.99	3153.92	3233.66	3233.66	450000	450000	450000	450000	450000
739	0.226472	0.226764	0.226618	0.994766	7.12427e-05	3534.45	450000	2034.45	2034.45		3534.45	450000	3534.45	4159.6	3155.56	3235.14	3235.14	450000	450000	450000	450000	450000
740	0.226764	0.227056	0.22691	0.994836	7.03531e-05	3538.29	450000	2038.29	2038.29		3538.29	450000	3538.29	4168.23	3157.19	3236.62	3236.62	450000	450000	450000	450000	450000
741	0.227056	0.227348	0.227202	0.994906	6.94735e-05	3542.13	450000	2042.13	2042.13		3542.13	450000	3542.13	4176.88	3158.83	3238.09	3238.09	450000	450000	450000	450000	450000
742	0.227348	0.227639	0.227493	0.994974	6.86039e-05	3545.97	450000	2045.97	2045.97		3545.97	450000	3545.97	4185.55	3160.46	3239.55	3239.55	450000	450000	450000	450000	450000
743	0.227639	0.227931	0.227785	0.995042	6.77442e-05	3549.81	450000	2049.81	2049.81		3549.81	450000	3549.81	4194.23	3162.09	3241.01	3241.01	450000	450000	450000	450000	450000
744	0.227931	0.228223	0.228077	0.995109	6.68944e-05	3553.65	450000	2053.65	2053.65		3553.65	450000	3553.65	4202.93	3163.71	3242.46	3242.46	450000	450000	450000	450000	450000
745	0.228223	0.228515	0.228369	0.995175	6.60542e-05	3557.49	450000	2057.49	2057.49		3557.49	450000	3557.49	4211.65	3165.34	3243.9	3243.9	450000	450000	450000	450000	450000
746	0.228515	0.228807	0.228661	0.99524	6.52237e-05	3561.33	450000	2061.33	2061.33		3561.33	450000	3561.33	4220.39	3166.96	3245.34	3245.34	450000	450000	450000	450000	450000
747	0.228807	0.229099	0.228953	0.995305	6.44027e-05	3565.17	450000	2065.17	2065.17		3565.17	450000	3565.17	4229.14	3168.58	3246.77	3246.77	450000	450000	450000	450000	450000
748	0.229099	0.22939	0.229245	0.995368	6.35911e-05	3569.01	450000	2069.01	2069.01		3569.01	450000	3569.01	4237.92	3170.2	3248.19	3248.19	450000	450000	450000	450000	450000
749	0.22939	0.229682	0.229536	0.995431	6.27888e-05	3572.85	450000	2072.85	2072.85		3572.85	450000	3572.85	4246.71	3171.82	3249.61	3249.61	450000	450000	450000	450000	450000
750	0.229682	0.229974	0.229828	0.995493	6.19958e-05	3576.69	450000	2076.69	2076.69		3576.69	450000	3576.69	4255.52	3173.43	3251.02	3251.02	450000	450000	450000	450000	450000
751	0.229974	0.230266	0.23012	0.995554	6.12119e-05	3580.53	450000	2080.53	2080.53		3580.53	450000	3580.53	4264.35	3175.04	3252.43	3252.43	450000	450000	450000	450000	450000
752	0.230266	0.230558	0.230412	0.995615	6.04371e-05	3584.37	450000	2084.37	2084.37		3584.37	450000	3584.37	4273.2	3176.65	3253.83	3253.83	450000	450000	450000	450000	450000
753	0.230558	0.23085	0.230704	0.995674	5.96712e-05	3588.21	450000	2088.21	2088.21		3588.21	450000	3588.21	4282.06	3178.26	3255.22	3255.22	450000	450000	450000	450000	450000
754	0.23085	0.231142	0.230996	0.995733	5.89142e-05	3592.05	450000	2092.05	2092.05		3592.05	450000	3592.05	4290.95	3179.87	3256.61	3256.61	450000	450000	450000	450000	450000
755	0.231142	0.231433	0.231287	0.995791	5.81659e-05	3595.89	450000	2095.89	2095.89		3595.89	450000	3595.89	4299.85	3181.47	3257.99	3257.99	450000	450000	450000	450000	450000
756	0.231433	0.231725	0.231579	0.995849	5.74264e-05	3599.73	450000	2099.73	2099.73		3599.73	450000	3599.73	4308.77	3183.07	3259.36	3259.36	450000	450000	450000	450000	450000
757	0.231725	0.232017	0.231871	0.995906	5.66954e-05	3603.57	450000	2103.57	2103.57		3603.57	450000	3603.57	4317.71	3184.67	3260.73	3260.73	450000	450000	450000	450000	450000
758	0.232017	0.232309	0.232163	0.995961	5.5973e-05	3607.41	450000	2107.41	2107.41		3607.41	450000	3607.41	4326.67	3186.27	3262.09	3262.09	450000	450000	450000	450000	450000
759	0.232309	0.232601	0.232455	0.996017	5.52589e-05	3611.25	450000	2111.25	2111.25		3611.25	450000	3611.25	4335.65	3187.87	3263.45	3263.45	450000	450000	450000	450000	450000
760	0.232601	0.232893	0.232747	0.996071	5.45533e-05	3615.09	450000	2115.09	2115.09		3615.09	450000	3615.09	4344.64	3189.46	3264.8	3264.8	450000	450000	450000	450000	450000
761	0.232893	0.233184	0.233039	0.996125	5.38558e-05	3618.93	450000	2118.93	2118.93		3618.93	450000	3618.93	4353.65	3191.05	3266.14	3266.14	450000	450000	450000	450000	450000
762	0.233184	0.233476	0.23333	0.996178	5.31665e-05	3622.77	450000	2122.77	2122.77		3622.77	450000	3622.77	4362.69	3192.64	3267.48	3267.48	450000	450000	450000	450000	450000
763	0.233476	0.233768	0.233622	0.996231	5.24853e-05	3626.61	450000	2126.61	2126.61		3626.61	450000	3626.61	4371.74	3194.23	3268.81	3268.81	450000	450000	450000	450000	450000
764	0.233768	0.23406	0.233914	0.996283	5.18121e-05	3630.45	450000	2130.45	2130.45		3630.45	450000	3630.45	4380.81	3195.82	3270.13	3270.13	450000	450000	450000	450000	450000
765	0.23406	0.234352	0.234206	0.996334	5.11468e-05	3634.29	450000	2134.29	2134.29		3634.29	450000	3634.29	4389.9	3197.4	3271.45	3271.45	450000	450000	450000	450000	450000
766	0.234352	0.234644	0.234498	0.996384	5.04894e-05	3638.13	450000	2138.13	2138.13		3638.13	450000	3638.13	4399.01	3198.98	3272.76	3272.76	450000	450000	450000	450000	450000
767	0.234644	0.234936	0.23479	0.996434	4.98397e-05	3641.97	450000	2141.97	2141.97		3641.97	450000	3641.97	4408.13	3200.56	3274.06	3274.06	450000	450000	450000	450000	450000
768	0.234936	0.235227	0.235081	0.996483	4.91976e-05	3645.81	450000	2145.81	2145.81		3645.81	450000	3645.81	4417.28	3202.14	3275.36	3275.36	450000	450000	450000	450000	450000
769	0.235227	0.235519	0.235373	0.996532	4.85632e-05	3649.65	450000	2149.65	2149.65		3649.65	450000	3649.65	4426.44	3203.72	3276.65	3276.65	450000	450000	450000	450000	450000
770	0.235519	0.235811	0.235665	0.99658	4.79362e-05	3653.49	450000	2153.49	2153.49		3653.49	450000	3653.49	4435.63	3205.29	3277.94	3277.94	450000	450000	450000	450000	450000
771	0.235811	0.236103	0.235957	0.996627	4.73167e-05	3657.33	450000	2157.33	2157.33		3657.33	450000	3657.33	4444.83	3206.87	3279.22	3279.22	450000	450000	450000	450000	450000
772	0.236103	0.236395	0.236249	0.996674	4.67046e-05	3661.17	450000	2161.17	2161.17		3661.17	450000	3661.17	4454.05	3208.44	3280.49	3280.49	450000	450000	450000	450000	450000
773	0.236395	0.236687	0.236541	0.99672	4.60997e-05	3665.01	450000	2165.01	2165.01		3665.01	450000	3665.01	4463.29	3210	3281.76	3281.76	450000	450000	450000	450000	450000
774	0.236687	0.236978	0.236833	0.996765	4.5502e-05	3668.85	450000	2168.85	2168.85		3668.85	450000	3668.85	4472.55	3211.57	3283.02	3283.02	450000	450000	450000	450000	450000
775	0.236978	0.23727	0.237124	0.99681	4.49114e-05	3672.69	450000	2172.69	2172.69		3672.69	450000	3672.69	4481.83	3213.14	3284.27	3284.27	450000	450000	450000	450000	450000
776	0.23727	0.237562	0.237416	0.996855	4.43279e-05	3676.53	450000	2176.53	2176.53		3676.53	450000	3676.53	4491.13	3214.7	3285.52	3285.52	450000	450000	450000	450000	450000
777	0.237562	0.237854	0.237708	0.996898	4.37513e-05	3680.37	450000	2180.37	2180.37		3680.37	450000	3680.37	4500.45	3216.26	3286.76	3286.76	450000	450000	450000	450000	450000
778	0.237854	0.238146	0.238	0.996942	4.31816e-05	3684.21	450000	2184.21	2184.21		3684.21	450000	3684.21	4509.78	3217.82	3288	3288	450000	450000	450000	450000	450000
779	0.238146	0.238438	0.238292	0.996984	4.26188e-05	3688.05	450000	2188.05	2188.05		3688.05	450000	3688.05	4519.14	3219.37	3289.23	3289.23	450000	450000	450000	450000	450000
780	0.238438	0.23873	0.238584	0.997026	4.20627e-05	3691.89	450000	2191.89	2191.89		3691.89	450000	3691.89	4528.52	3220.93	3290.45	3290.45	450000	450000	450000	450000	450000
781	0.23873	0.239021	0.238875	0.997068	4.15133e-05	3695.73	450000	2195.73	2195.73		3695.73	450000	3695.73	4537.91	3222.48	3291.67	3291.67	450000	450000	450000	450000	450000
782	0.239021	0.239313	0.239167	0.997109	4.09705e-05	3699.57	450000	2199.57	2199.57		3699.57	450000	3699.57	4547.33	3224.03	3292.88	3292.88	450000	450000	450000	450000	450000
783	0.239313	0.239605	0.239459	0.997149	4.04342e-05	3703.41	450000	2203.41	2203.41		3703.41	450000	3703.41	4556.76	3225.58	3294.08	3294.08	450000	450000	450000	450000	450000
784	0.239605	0.239897	0.239751	0.997189	3.99044e-05	3707.25	450000	2207.25	2207.25		3707.25	450000	3707.25	4566.22	3227.13	3295.28	3295.28	450000	450000	450000	450000	450000
785	0.239897	0.240189	0.240043	0.997228	3.9381e-05	3711.09	450000	2211.09	2211.09		3711.09	450000	3711.09	4575.69	3228.68	3296.47	3296.47	450000	450000	450000	450000	450000
786	0.240189	0.240481	0.240335	0.997267	3.88639e-05	3714.93	450000	2214.93	2214.93		3714.93	450000	3714.93	4585.18	3230.22	3297.66	3297.66	450000	450000	450000	450000	450000
787	0.240481	0.240772	0.240627	0.997306	3.83531e-05	3718.77	450000	2218.77	2218.77		3718.77	450000	3718.77	4594.69	3231.76	3298.83	3298.83	450000	450000	450000	450000	450000
788	0.240772	0.241064	0.240918	0.997344	3.78485e-05	3722.61	450000	2222.61	2222.61		3722.61	450000	3722.61	4604.23	3233.3	3300.01	3300.01	450000	450000	450000	450000	450000
789	0.241064	0.241356	0.24121	0.997381	3.73499e-05	3726.45	450000	2226.45	2226.45		3726.45	450000	3726.45	4613.78	3234.84	3301.17	3301.17	450000	450000	450000	450000	450000
790	0.241356	0.241648	0.241502	0.997418	3.68575e-05	3730.29	450000	2230.29	2230.29		3730.29	450000	3730.29	4623.35	3236.38	3302.33	3302.33	450000	450000	450000	450000	450000
791	0.241648	0.24194	0.241794	0.997454	3.6371e-05	3734.13	450000	2234.13	2234.13		3734.13	450000	3734.13	4632.94	3237.91	3303.49	3303.49	450000	450000	450000	450000	450000
792	0.24194	0.242232	0.242086	0.99749	3.58905e-05	3737.97	450000	2237.97	2237.97		3737.97	450000	3737.97	4642.56	3239.44	3304.63	3304.63	450000	450000	450000	450000	450000
793	0.242232	0.242524	0.242378	0.997525	3.54158e-05	3741.81	450000	2241.81	2241.81		3741.81	450000	3741.81	4652.19	3240.97	3305.77	3305.77	450000	450000	450000	450000	450000
794	0.242524	0.242815	0.242669	0.99756	3.49469e-05	3745.65	450000	2245.65	2245.65		3745.65	450000	3745.65	4661.84	3242.5	3306.91	3306.91	450000	450000	450000	450000	450000
795	0.242815	0.243107	0.242961	0.997595	3.44837e-05	3749.49	450000	2249.49	2249.49		3749.49	450000	3749.49	4671.51	3244.03	3308.04	3308.04	450000	450000	450000	450000	450000
796	0.243107	0.243399	0.243253	0.997629	3.40263e-05	3753.33	450000	2253.33	2253.33		3753.33	450000	3753.33	4681.2	3245.55	3309.16	3309.16	450000	450000	450000	450000	450000
797	0.243399	0.243691	0.243545	0.997662	3.35744e-05	3757.17	450000	2257.17	2257.17		3757.17	450000	3757.17	4690.92	3247.08	3310.27	3310.27	450000	450000	450000	450000	450000
798	0.243691	0.243983	0.243837	0.997696	3.31281e-05	3761.01	450000	2261.01	2261.01		3761.01	450000	3761.01	4700.65	3248.6	3311.38	3311.38	450000	450000	450000	450000	450000
799	0.243983	0.244275	0.244129	0.997728	3.26872e-05	3764.85	450000	2264.85	2264.85		3764.85	450000	3764.85	4710.4	3250.12	3312.49	3312.49	450000	450000	450000	450000	450000
800	0.244275	0.244566	0.244421	0.997761	3.22518e-05	3768.69	450000	2268.69	2268.69		3768.69	450000	3768.69	4720.17	3251.64	3313.58	3313.58	450000	450000	450000	450000	450000
801	0.244566	0.244858	0.244712	0.997792	3.18217e-05	3772.53	450000	2272.53	2272.53		3772.53	450000	3772.53	4729.97	3253.15	3314.67	3314.67	450000	450000	450000	450000	450000
802	0.244858	0.24515	0.245004	0.997824	3.1397e-05	3776.37	450000	2276.37	2276.37		3776.37	450000	3776.37	4739.78	3254.67	3315.76	3315.76	450000	450000	450000	450000	450000
803	0.24515	0.245442	0.245296	0.997855	3.09775e-05	3780.21	450000	2280.21	2280.21		3780.21	450000	3780.21	4749.61	3256.18	3316.83	3316.83	450000	450000	450000	450000	450000
804	0.245442	0.245734	0.245588	0.997885	3.05631e-05	3784.05	450000	2284.05	2284.05		3784.05	450000	3784.05	4759.47	3257.69	3317.91	3317.91	450000	450000	450000	450000	450000
805	0.245734	0.246026	0.24588	0.997915	3.01539e-05	3787.89	450000	2287.89	2287.89		3787.89	450000	3787.89	4769.34	3259.2	3318.97	3318.97	450000	450000	450000	450000	450000
806	0.246026	0.246318	0.246172	0.997945	2.97498e-05	3791.73	450000	2291.73	2291.73		3791.73	450000	3791.73	4779.24	3260.71	3320.03	3320.03	450000	450000	450000	450000	450000
807	0.246318	0.246609	0.246463	0.997975	2.93507e-05	3795.57	450000	2295.57	2295.57		3795.57	450000	3795.57	4789.15	3262.21	3321.08	3321.08	450000	450000	450000	450000	450000
808	0.246609	0.246901	0.246755	0.998003	2.89566e-05	3799.41	450000	2299.41	2299.41		3799.41	450000	3799.41	4799.09	3263.72	3322.13	3322.13	450000	450000	450000	450000	450000
809	0.246901	0.247193	0.247047	0.998032	2.85673e-05	3803.25	450000	2303.25	2303.25		3803.25	450000	3803.25	4809.05	3265.22	3323.17	3323.17	450000	450000	450000	450000	450000
810	0.247193	0.247485	0.247339	0.99806	2.81829e-05	3807.09	450000	2307.09	2307.09		3807.09	450000	3807.09	4819.02	3266.72	3324.2	3324.2	450000	450000	450000	450000	450000
811	0.247485	0.247777	0.247631	0.998088	2.78033e-05	3810.93	450000	2310.93	2310.93		3810.93	450000	3810.93	4829.02	3268.21	3325.23	3325.23	450000	450000	450000	450000	450000
812	0.247777	0.248069	0.247923	0.998115	2.74284e-05	3814.77	450000	2314.77	2314.77		3814.77	450000	3814.77	4839.04	3269.71	3326.25	3326.25	450000	450000	450000	450000	450000
813	0.248069	0.248361	0.248215	0.998143	2.70583e-05	3818.61	450000	2318.61	2318.61		3818.61	450000	3818.61	4849.08	3271.21	3327.26	3327.26	450000	450000	450000	450000	450000
814	0.248361	0.248652	0.248506	0.998169	2.66927e-05	3822.45	450000	2322.45	2322.45		3822.45	450000	3822.45	4859.14	3272.7	3328.27	3328.27	450000	450000	450000	450000	450000
815	0.248652	0.248944	0.248798	0.998196	2.63318e-05	3826.29	450000	2326.29	2326.29		3826.29	450000	3826.29	4869.22	3274.19	3329.27	3329.27	450000	450000	450000	450000	450000
816	0.248944	0.249236	0.24909	0.998222	2.59753e-05	3830.13	450000	2330.13	2330.13		3830.13	450000	3830.13	4879.32	3275.68	3330.27	3330.27	450000	450000	450000	450000	450000
817	0.249236	0.249528	0.249382	0.998247	2.56234e-05	3833.97	450000	2333.97	2333.97		3833.97	450000	3833.97	4889.45	3277.17	3331.26	3331.26	450000	450000	450000	450000	450000
818	0.249528	0.24982	0.249674	0.998272	2.52758e-05	3837.81	450000	2337.81	2337.81		3837.81	450000	3837.81	4899.59	3278.65	3332.24	3332.24	450000	450000	450000	450000	450000
819	0.24982	0.250112	0.249966	0.998297	2.49327e-05	3841.65	450000	2341.65	2341.65		3841.65	450000	3841.65	4909.76	3280.14	3333.22	3333.22	450000	450000	450000	450000	450000
820	0.250112	0.250403	0.250258	0.998322	2.45938e-05	3845.49	450000	2345.49	2345.49		3845.49	450000	3845.49	4919.94	3281.62	3334.19	3334.19	450000	450000	450000	450000	450000
821	0.250403	0.250695	0.250549	0.998346	2.42593e-05	3849.33	450000	2349.33	2349.33		3849.33	450000	3849.33	4930.15	3283.1	3335.15	3335.15	450000	450000	450000	450000	450000
822	0.250695	0.250987	0.250841	0.99837	2.3929e-05	3853.17	450000	2353.17	2353.17		3853.17	450000	3853.17	4940.38	3284.58	3336.11	3336.11	450000	450000	450000	450000	450000
823	0.250987	0.251279	0.251133	0.998394	2.36028e-05	3857.01	450000	2357.01	2357.01		3857.01	450000	3857.01	4950.63	3286.06	3337.06	3337.06	450000	450000	450000	450000	450000
824	0.251279	0.251571	0.251425	0.998417	2.32808e-05	3860.85	450000	2360.85	2360.85		3860.85	450000	3860.85	4960.9	3287.53	3338.01	3338.01	450000	450000	450000	450000	450000
825	0.251571	0.251863	0.251717	0.99844	2.29628e-05	3864.69	450000	2364.69	2364.69		3864.69	450000	3864.69	4971.19	3289.01	3338.95	3338.95	450000	450000	450000	450000	450000
826	0.251863	0.252155	0.252009	0.998463	2.26489e-05	3868.53	450000	2368.53	2368.53		3868.53	450000	3868.53	4981.51	3290.48	3339.88	3339.88	450000	450000	450000	450000	450000
827	0.252155	0.252446	0.2523	0.998485	2.2339e-05	3872.37	450000	2372.37	2372.37		3872.37	450000	3872.37	4991.84	3291.95	3340.81	3340.81	450000	450000	450000	450000	450000
828	0.252446	0.252738	0.252592	0.998507	2.20331e-05	3876.21	450000	2376.21	2376.21		3876.21	450000	3876.21	5002.2	3293.42	3341.73	3341.73	450000	450000	450000	450000	450000
829	0.252738	0.25303	0.252884	0.998529	2.1731e-05	3880.05	450000	2380.05	2380.05		3880.05	450000	3880.05	5012.58	3294.88	3342.64	3342.64	450000	450000	450000	450000	450000
830	0.25303	0.253322	0.253176	0.99855	2.14328e-05	3883.89	450000	2383.89	2383.89		3883.89	450000	3883.89	5022.98	3296.35	3343.55	3343.55	450000	450000	450000	450000	450000
831	0.253322	0.253614	0.253468	0.998571	2.11384e-05	3887.73	450000	2387.73	2387.73		3887.73	450000	3887.73	5033.4	3297.81	3344.45	3344.45	450000	450000	450000	450000	450000
832	0.253614	0.253906	0.25376	0.998592	2.08477e-05	3891.57	450000	2391.57	2391.57		3891.57	450000	3891.57	5043.84	3299.28	3345.34	3345.34	450000	450000	450000	450000	450000
833	0.253906	0.254197	0.254052	0.998613	2.05608e-05	3895.41	450000	2395.41	2395.41		3895.41	450000	3895.41	5054.3	3300.74	3346.23	3346.23	450000	450000	450000	450000	450000
834	0.254197	0.254489	0.254343	0.998633	2.02776e-05	3899.25	450000	2399.25	2399.25		3899.25	450000	3899.25	5064.79	3302.19	3347.11	3347.11	450000	450000	450000	450000	450000
835	0.254489	0.254781	0.254635	0.998653	1.9998e-05	3903.1	450000	2403.1	2403.1		3903.1	450000	3903.1	5075.3	3303.65	3347.99	3347.99	450000	450000	450000	450000	450000
836	0.254781	0.255073	0.254927	0.998673	1.97219e-05	3906.94	450000	2406.94	2406.94		3906.94	450000	3906.94	5085.83	3305.11	3348.86	3348.86	450000	450000	450000	450000	450000
837	0.255073	0.255365	0.255219	0.998692	1.94495e-05	3910.78	450000	2410.78	2410.78		3910.78	450000	3910.78	5096.38	3306.56	3349.72	3349.72	450000	450000	450000	450000	450000
838	0.255365	0.255657	0.255511	0.998711	1.91805e-05	3914.62	450000	2414.62	2414.62		3914.62	450000	3914.62	5106.95	3308.01	3350.58	3350.58	450000	450000	450000	450000	450000
839	0.255657	0.255949	0.255803	0.99873	1.8915e-05	3918.46	450000	2418.46	2418.46		3918.46	450000	3918.46	5117.55	3309.46	3351.43	3351.43	450000	450000	450000	450000	450000
840	0.255949	0.25624	0.256094	0.998749	1.86529e-05	3922.3	450000	2422.3	2422.3		3922.3	450000	3922.3	5128.17	3310.91	3352.27	3352.27	450000	450000	450000	450000	450000
841	0.25624	0.256532	0.256386	0.998767	1.83942e-05	3926.14	450000	2426.14	2426.14		3926.14	450000	3926.14	5138.81	3312.36	3353.11	3353.11	450000	450000	450000	450000	450000
842	0.256532	0.256824	0.256678	0.998785	1.81389e-05	3929.98	450000	2429.98	2429.98		3929.98	450000	3929.98	5149.47	3313.8	3353.94	3353.94	450000	450000	450000	450000	450000
843	0.256824	0.257116	0.25697	0.998803	1.78868e-05	3933.82	450000	2433.82	2433.82		3933.82	450000	3933.82	5160.15	3315.25	3354.77	3354.77	450000	450000	450000	450000	450000
844	0.257116	0.257408	0.257262	0.998821	1.76381e-05	3937.66	450000	2437.66	2437.66		3937.66	450000	3937.66	5170.86	3316.69	3355.59	3355.59	450000	450000	450000	450000	450000
845	0.257408	0.2577	0.257554	0.998838	1.73925e-05	3941.5	450000	2441.5	2441.5		3941.5	450000	3941.5	5181.59	3318.13	3356.4	3356.4	450000	450000	450000	450000	450000
846	0.2577	0.257991	0.257846	0.998856	1.71502e-05	3945.34	450000	2445.34	2445.34		3945.34	450000	3945.34	5192.34	3319.57	3357.21	3357.21	450000	450000	450000	450000	450000
847	0.257991	0.258283	0.258137	0.998872	1.6911e-05	3949.18	450000	2449.18	2449.18		3949.18	450000	3949.18	5203.11	3321.01	3358.01	3358.01	450000	450000	450000	450000	450000
848	0.258283	0.258575	0.258429	0.998889	1.66749e-05	3953.02	450000	2453.02	2453.02		3953.02	450000	3953.02	5213.9	3322.44	3358.8	3358.8	450000	450000	450000	450000	450000
849	0.258575	0.258867	0.258721	0.998906	1.64419e-05	3956.86	450000	2456.86	2456.86		3956.86	450000	3956.86	5224.72	3323.87	3359.59	3359.59	450000	450000	450000	450000	450000
850	0.258867	0.259159	0.259013	0.998922	1.62119e-05	3960.7	450000	2460.7	2460.7		3960.7	450000	3960.7	5235.56	3325.31	3360.37	3360.37	450000	450000	450000	450000	450000
851	0.259159	0.259451	0.259305	0.998938	1.59849e-05	3964.54	450000	2464.54	2464.54		3964.54	450000	3964.54	5246.42	3326.74	3361.14	3361.14	450000	450000	450000	450000	450000
852	0.259451	0.259743	0.259597	0.998954	1.57609e-05	3968.38	450000	2468.38	2468.38		3968.38	450000	3968.38	5257.31	3328.17	3361.91	3361.91	450000	450000	450000	450000	450000
853	0.259743	0.260034	0.259888	0.998969	1.55399e-05	3972.22	450000	2472.22	2472.22		3972.22	450000	3972.22	5268.21	3329.59	3362.67	3362.67	450000	450000	450000	450000	450000
854	0.260034	0.260326	0.26018	0.998984	1.53217e-05	3976.06	450000	2476.06	2476.06		3976.06	450000	3976.06	5279.14	3331.02	3363.43	3363.43	450000	450000	450000	450000	450000
855	0.260326	0.260618	0.260472	0.998999	1.51064e-05	3979.9	450000	2479.9	2479.9		3979.9	450000	3979.9	5290.1	3332.44	3364.18	3364.18	450000	450000	450000	450000	450000
856	0.260618	0.26091	0.260764	0.999014	1.48939e-05	3983.74	450000	2483.74	2483.74		3983.74	450000	3983.74	5301.07	3333.87	3364.92	3364.92	450000	450000	450000	450000	450000
857	0.26091	0.261202	0.261056	0.999029	1.46842e-05	3987.58	450000	2487.58	2487.58		3987.58	450000	3987.58	5312.07	3335.29	3365.66	3365.66	450000	450000	450000	450000	450000
858	0.261202	0.261494	0.261348	0.999044	1.44773e-05	3991.42	450000	2491.42	2491.42		3991.42	450000	3991.42	5323.09	3336.71	3366.39	3366.39	450000	450000	450000	450000	450000
859	0.261494	0.261785	0.26164	0.999058	1.42731e-05	3995.26	450000	2495.26	2495.26		3995.26	450000	3995.26	5334.14	3338.13	3367.11	3367.11	450000	450000	450000	450000	450000
860	0.261785	0.262077	0.261931	0.999072	1.40716e-05	3999.1	450000	2499.1	2499.1		3999.1	450000	3999.1	5345.2	3339.54	3367.83	3367.83	450000	450000	450000	450000	450000
861	0.262077	0.262369	0.262223	0.999086	1.38728e-05	4002.94	450000	2502.94	2502.94		4002.94	450000	4002.94	5356.29	3340.96	3368.54	3368.54	450000	450000	450000	450000	450000
862	0.262369	0.262661	0.262515	0.999099	1.36765e-05	4006.78	450000	2506.78	2506.78		4006.78	450000	4006.78	5367.41	3342.37	3369.25	3369.25	450000	450000	450000	450000	450000
863	0.262661	0.262953	0.262807	0.999113	1.34829e-05	4010.62	450000	2510.62	2510.62		4010.62	450000	4010.62	5378.54	3343.78	3369.95	3369.95	450000	450000	450000	450000	450000
864	0.262953	0.263245	0.263099	0.999126	1.32919e-05	4014.46	450000	2514.46	2514.46		4014.46	450000	4014.46	5389.7	3345.19	3370.64	3370.64	450000	450000	450000	450000	450000
865	0.263245	0.263537	0.263391	0.999139	1.31034e-05	4018.3	450000	2518.3	2518.3		4018.3	450000	4018.3	5400.88	3346.6	3371.33	3371.33	450000	450000	450000	450000	450000
866	0.263537	0.263828	0.263682	0.999152	1.29173e-05	4022.14	450000	2522.14	2522.14		4022.14	450000	4022.14	5412.09	3348.01	3372.01	3372.01	450000	450000	450000	450000	450000
867	0.263828	0.26412	0.263974	0.999165	1.27338e-05	4025.98	450000	2525.98	2525.98		4025.98	450000	4025.98	5423.32	3349.41	3372.68	3372.68	450000	450000	450000	450000	450000
868	0.26412	0.264412	0.264266	0.999178	1.25527e-05	4029.82	450000	2529.82	2529.82		4029.82	450000	4029.82	5434.57	3350.82	3373.35	3373.35	450000	450000	450000	450000	450000
869	0.264412	0.264704	0.264558	0.99919	1.2374e-05	4033.66	450000	2533.66	2533.66		4033.66	450000	4033.66	5445.84	3352.22	3374.01	3374.01	450000	450000	450000	450000	450000
870	0.264704	0.264996	0.26485	0.999202	1.21977e-05	4037.5	450000	2537.5	2537.5		4037.5	450000	4037.5	5457.14	3353.62	3374.67	3374.67	450000	450000	450000	450000	450000
871	0.264996	0.265288	0.265142	0.999214	1.20237e-05	4041.34	450000	2541.34	2541.34		4041.34	450000	4041.34	5468.46	3355.02	3375.31	3375.31	450000	450000	450000	450000	450000
872	0.265288	0.265579	0.265434	0.999226	1.18521e-05	4045.18	450000	2545.18	2545.18		4045.18	450000	4045.18	5479.81	3356.42	3375.96	3375.96	450000	450000	450000	450000	450000
873	0.265579	0.265871	0.265725	0.999238	1.16828e-05	4049.02	450000	2549.02	2549.02		4049.02	450000	4049.02	5491.18	3357.81	3376.59	3376.59	450000	450000	450000	450000	450000
874	0.265871	0.266163	0.266017	0.999249	1.15157e-05	4052.86	450000	2552.86	2552.86		4052.86	450000	4052.86	5502.57	3359.21	3377.22	3377.22	450000	450000	450000	450000	450000
875	0.266163	0.266455	0.266309	0.99926	1.13509e-05	4056.7	450000	2556.7	2556.7		4056.7	450000	4056.7	5513.99	3360.6	3377.85	3377.85	450000	450000	450000	450000	450000
876	0.266455	0.266747	0.266601	0.999272	1.11883e-05	4060.54	450000	2560.54	2560.54		4060.54	450000	4060.54	5525.43	3361.99	3378.46	3378.46	450000	450000	450000	450000	450000
877	0.266747	0.267039	0.266893	0.999283	1.10279e-05	4064.38	450000	2564.38	2564.38		4064.38	450000	4064.38	5536.89	3363.38	3379.07	3379.07	450000	450000	450000	450000	450000
878	0.267039	0.267331	0.267185	0.999294	1.08696e-05	4068.22	450000	2568.22	2568.22		4068.22	450000	4068.22	5548.38	3364.77	3379.68	3379.68	450000	450000	450000	450000	450000
879	0.267331	0.267622	0.267476	0.999304	1.07135e-05	4072.06	450000	2572.06	2572.06		4072.06	450000	4072.06	5559.89	3366.16	3380.28	3380.28	450000	450000	450000	450000	450000
880	0.267622	0.267914	0.267768	0.999315	1.05594e-05	4075.9	450000	2575.9	2575.9		4075.9	450000	4075.9	5571.42	3367.54	3380.87	3380.87	450000	450000	450000	450000	450000
881	0.267914	0.268206	0.26806	0.999325	1.04075e-05	4079.74	450000	2579.74	2579.74		4079.74	450000	4079.74	5582.98	3368.93	3381.45	3381.45	450000	450000	450000	450000	450000
882	0.268206	0.268498	0.268352	0.999336	1.02576e-05	4083.58	450000	2583.58	2583.58		4083.58	450000	4083.58	5594.57	3370.31	3382.03	3382.03	450000	450000	450000	450000	450000
883	0.268498	0.26879	0.268644	0.999346	1.01097e-05	4087.42	450000	2587.42	2587.42		4087.42	450000	4087.42	5606.17	3371.69	3382.61	3382.61	450000	450000	450000	450000	450000
884	0.26879	0.269082	0.268936	0.999356	9.96382e-06	4091.26	450000	2591.26	2591.26		4091.26	450000	4091.26	5617.81	3373.07	3383.17	3383.17	450000	450000	450000	450000	450000
885	0.269082	0.269374	0.269228	0.999365	9.81992e-06	4095.1	450000	2595.1	2595.1		4095.1	450000	4095.1	5629.46	3374.45	3383.73	3383.73	450000	450000	450000	450000	450000
886	0.269374	0.269665	0.269519	0.999375	9.67797e-06	4098.94	450000	2598.94	2598.94		4098.94	450000	4098.94	5641.14	3375.82	3384.29	3384.29	450000	450000	450000	450000	450000
887	0.269665	0.269957	0.269811	0.999385	9.53795e-06	4102.78	450000	2602.78	2602.78		4102.78	450000	4102.78	5652.84	3377.2	3384.83	3384.83	450000	450000	450000	450000	450000
888	0.269957	0.270249	0.270103	0.999394	9.39983e-06	4106.62	450000	2606.62	2606.62		4106.62	450000	4106.62	5664.57	3378.57	3385.38	3385.38	450000	450000	450000	450000	450000
889	0.270249	0.270541	0.270395	0.999403	9.26359e-06	4110.46	450000	2610.46	2610.46		4110.46	450000	4110.46	5676.32	3379.94	3385.91	3385.91	450000	450000	450000	450000	450000
890	0.270541	0.270833	0.270687	0.999412	9.12921e-06	4114.3	450000	2614.3	2614.3		4114.3	450000	4114.3	5688.1	3381.31	3386.44	3386.44	450000	450000	450000	450000	450000
891	0.270833	0.271125	0.270979	0.999421	8.99666e-06	4118.14	450000	2618.14	2618.14		4118.14	450000	4118.14	5699.9	3382.68	3386.96	3386.96	450000	450000	450000	450000	450000
892	0.271125	0.271416	0.271271	0.99943	8.86591e-06	4121.98	450000	2621.98	2621.98		4121.98	450000	4121.98	5711.73	3384.05	3387.48	3387.48	450000	450000	450000	450000	450000
893	0.271416	0.271708	0.271562	0.999439	8.73696e-06	4125.82	450000	2625.82	2625.82		4125.82	450000	4125.82	5723.58	3385.42	3387.99	3387.99	450000	450000	450000	450000	450000
894	0.271708	0.272	0.271854	0.999448	8.60976e-06	4129.66	450000	2629.66	2629.66		4129.66	450000	4129.66	5735.45	3386.78	3388.49	3388.49	450000	450000	450000	450000	450000
895	0.272	0.272292	0.272146	0.999456	8.48431e-06	4133.5	450000	2633.5	2633.5		4133.5	450000	4133.5	5747.35	3388.14	3388.99	3388.99	450000	450000	450000	450000	450000
896	0.272292	0.272584	0.272438	0.999464	8.36058e-06	4137.34	450000	2637.34	2637.34		4137.34	450000	4137.34	5759.28	3389.51	3389.48	3389.48	450000	450000	450000	450000	450000
897	0.272584	0.272876	0.27273	0.999473	8.23854e-06	4141.18	450000	2641.18	2641.18		4141.18	450000	4141.18	5771.22	3390.87	3389.96	3389.96	450000	450000	450000	450000	450000
898	0.272876	0.273168	0.273022	0.999481	8.11818e-06	4145.02	450000	2645.02	2645.02		4145.02	450000	4145.02	5783.2	3392.22	3390.44	3390.44	450000	450000	450000	450000	450000
899	0.273168	0.273459	0.273313	0.999489	7.99948e-06	4148.86	450000	2648.86	2648.86		4148.86	450000	4148.86	5795.2	3393.58	3390.91	3390.91	450000	450000	450000	450000	450000
900	0.273459	0.273751	0.273605	0.999497	7.8824e-06	4152.7	450000	2652.7	2652.7		4152.7	450000	4152.7	5807.22	3394.94	3391.38	3391.38	450000	450000	450000	450000	450000
901	0.273751	0.274043	0.273897	0.999504	7.76694e-06	4156.54	450000	2656.54	2656.54		4156.54	450000	4156.54	5819.27	3396.29	3391.84	3391.84	450000	450000	450000	450000	450000
902	0.274043	0.274335	0.274189	0.999512	7.65307e-06	4160.38	450000	2660.38	2660.38		4160.38	450000	4160.38	5831.34	3397.65	3392.29	3392.29	450000	450000	450000	450000	450000
903	0.274335	0.274627	0.274481	0.99952	7.54077e-06	4164.22	450000	2664.22	2664.22		4164.22	450000	4164.22	5843.44	3399	3392.74	3392.74	450000	450000	450000	450000	450000
904	0.274627	0.274919	0.274773	0.999527	7.43003e-06	4168.06	450000	2668.06	2668.06		4168.06	450000	4168.06	5855.56	3400.35	3393.18	3393.18	450000	450000	450000	450000	450000
905	0.274919	0.27521	0.275065	0.999534	7.32081e-06	4171.9	450000	2671.9	2671.9		4171.9	450000	4171.9	5867.71	3401.7	3393.61	3393.61	450000	450000	450000	450000	450000
906	0.27521	0.275502	0.275356	0.999542	7.21311e-06	4175.74	450000	2675.74	2675.74		4175.74	450000	4175.74	5879.89	3403.04	3394.04	3394.04	450000	450000	450000	450000	450000
907	0.275502	0.275794	0.275648	0.999549	7.1069e-06	4179.58	450000	2679.58	2679.58		4179.58	450000	4179.58	5892.09	3404.39	3394.46	3394.46	450000	450000	450000	450000	450000
908	0.275794	0.276086	0.27594	0.999556	7.00216e-06	4183.42	450000	2683.42	2683.42		4183.42	450000	4183.42	5904.31	3405.73	3394.88	3394.88	450000	450000	450000	450000	450000
909	0.276086	0.276378	0.276232	0.999563	6.89887e-06	4187.26	450000	2687.26	2687.26		4187.26	450000	4187.26	5916.56	3407.08	3395.29	3395.29	450000	450000	450000	450000	450000
910	0.276378	0.27667	0.276524	0.999569	6.79703e-06	4191.1	450000	2691.1	2691.1		4191.1	450000	4191.1	5928.83	3408.42	3395.69	3395.69	450000	450000	450000	450000	450000
911	0.27667	0.276962	0.276816	0.999576	6.69659e-06	4194.94	450000	2694.94	2694.94		4194.94	450000	4194.94	5941.14	3409.76	3396.09	3396.09	450000	450000	450000	450000	450000
912	0.276962	0.277253	0.277107	0.999583	6.59756e-06	4198.78	450000	2698.78	2698.78		4198.78	450000	4198.78	5953.46	3411.1	3396.48	3396.48	450000	450000	450000	450000	450000
913	0.277253	0.277545	0.277399	0.999589	6.49991e-06	4202.62	450000	2702.62	2702.62		4202.62	450000	4202.62	5965.81	3412.43	3396.86	3396.86	450000	450000	450000	450000	450000
914	0.277545	0.277837	0.277691	0.999596	6.40361e-06	4206.46	450000	2706.46	2706.46		4206.46	450000	4206.46	5978.19	3413.77	3397.24	3397.24	450000	450000	450000	450000	450000
915	0.277837	0.278129	0.277983	0.999602	6.30867e-06	4210.3	450000	2710.3	2710.3		4210.3	450000	4210.3	5990.59	3415.1	3397.61	3397.61	450000	450000	450000	450000	450000
916	0.278129	0.278421	0.278275	0.999608	6.21505e-06	4214.14	450000	2714.14	2714.14		4214.14	450000	4214.14	6003.02	3416.44	3397.97	3397.97	450000	450000	450000	450000	450000
917	0.278421	0.278713	0.278567	0.999614	6.12274e-06	4217.98	450000	2717.98	2717.98		4217.98	450000	4217.98	6015.48	3417.77	3398.33	3398.33	450000	450000	450000	450000	450000
918	0.278713	0.279004	0.278859	0.99962	6.03172e-06	4221.82	450000	2721.82	2721.82		4221.82	450000	4221.82	6027.96	3419.1	3398.68	3398.68	450000	450000	450000	450000	450000
919	0.279004	0.279296	0.27915	0.999626	5.94198e-06	4225.66	450000	2725.66	2725.66		4225.66	450000	4225.66	6040.46	3420.43	3399.03	3399.03	450000	450000	450000	450000	450000
920	0.279296	0.279588	0.279442	0.999632	5.8535e-06	4229.5	450000	2729.5	2729.5		4229.5	450000	4229.5	6053	3421.76	3399.37	3399.37	450000	450000	450000	450000	450000
921	0.279588	0.27988	0.279734	0.999638	5.76627e-06	4233.34	450000	2733.34	2733.34		4233.34	450000	4233.34	6065.55	3423.08	3399.7	3399.7	450000	450000	450000	450000	450000
922	0.27988	0.280172	0.280026	0.999644	5.68026e-06	4237.18	450000	2737.18	2737.18		4237.18	450000	4237.18	6078.14	3424.41	3400.03	3400.03	450000	450000	450000	450000	450000
923	0.280172	0.280464	0.280318	0.999649	5.59545e-06	4241.02	450000	2741.02	2741.02		4241.02	450000	4241.02	6090.75	3425.73	3400.35	3400.35	450000	450000	450000	450000	450000
924	0.280464	0.280756	0.28061	0.999655	5.51185e-06	4244.86	450000	2744.86	2744.86		4244.86	450000	4244.86	6103.39	3427.05	3400.66	3400.66	450000	450000	450000	450000	450000
925	0.280756	0.281047	0.280901	0.99966	5.42942e-06	4248.7	450000	2748.7	2748.7		4248.7	450000	4248.7	6116.05	3428.37	3400.97	3400.97	450000	450000	450000	450000	450000
926	0.281047	0.281339	0.281193	0.999665	5.34816e-06	4252.54	450000	2752.54	2752.54		4252.54	450000	4252.54	6128.74	3429.69	3401.27	3401.27	450000	450000	450000	450000	450000
927	0.281339	0.281631	0.281485	0.999671	5.26805e-06	4256.38	450000	2756.38	2756.38		4256.38	450000	4256.38	6141.45	3431.01	3401.57	3401.57	450000	450000	450000	450000	450000
928	0.281631	0.281923	0.281777	0.999676	5.18906e-06	4260.22	450000	2760.22	2760.22		4260.22	450000	4260.22	6154.19	3432.33	3401.86	3401.86	450000	450000	450000	450000	450000
929	0.281923	0.282215	0.282069	0.999681	5.1112e-06	4264.06	450000	2764.06	2764.06		4264.06	450000	4264.06	6166.96	3433.64	3402.14	3402.14	450000	450000	450000	450000	450000
930	0.282215	0.282507	0.282361	0.999686	5.03444e-06	4267.9	450000	2767.9	2767.9		4267.9	450000	4267.9	6179.76	3434.96	3402.42	3402.42	450000	450000	450000	450000	450000
931	0.282507	0.282798	0.282653	0.999691	4.95877e-06	4271.74	450000	2771.74	2771.74		4271.74	450000	4271.74	6192.58	3436.27	3402.69	3402.69	450000	450000	450000	450000	450000
932	0.282798	0.28309	0.282944	0.999696	4.88417e-06	4275.58	450000	2775.58	2775.58		4275.58	450000	4275.58	6205.43	3437.58	3402.95	3402.95	450000	450000	450000	450000	450000
933	0.28309	0.283382	0.283236	0.999701	4.81064e-06	4279.42	450000	2779.42	2779.42		4279.42	450000	4279.42	6218.3	3438.89	3403.21	3403.21	450000	450000	450000	450000	450000
934	0.283382	0.283674	0.283528	0.999705	4.73815e-06	4283.26	450000	2783.26	2783.26		4283.26	450000	4283.26	6231.2	3440.2	3403.46	3403.46	450000	450000	450000	450000	450000
935	0.283674	0.283966	0.28382	0.99971	4.66669e-06	4287.1	450000	2787.1	2787.1		4287.1	450000	4287.1	6244.13	3441.5	3403.7	3403.7	450000	450000	450000	450000	450000
936	0.283966	0.284258	0.284112	0.999715	4.59625e-06	4290.94	450000	2790.94	2790.94		4290.94	450000	4290.94	6257.08	3442.81	3403.94	3403.94	450000	450000	450000	450000	450000
937	0.284258	0.28455	0.284404	0.999719	4.52682e-06	4294.78	450000	2794.78	2794.78		4294.78	450000	4294.78	6270.07	3444.11	3404.17	3404.17	450000	450000	450000	450000	450000
938	0.28455	0.284841	0.284695	0.999724	4.45837e-06	4298.62	450000	2798.62	2798.62		4298.62	450000	4298.62	6283.07	3445.42	3404.4	3404.4	450000	450000	450000	450000	450000
939	0.284841	0.285133	0.284987	0.999728	4.39091e-06	4302.46	450000	2802.46	2802.46		4302.46	450000	4302.46	6296.11	3446.72	3404.62	3404.62	450000	450000	450000	450000	450000
940	0.285133	0.285425	0.285279	0.999732	4.32441e-06	4306.31	450000	2806.31	2806.31		4306.31	450000	4306.31	6309.17	3448.02	3404.83	3404.83	450000	450000	450000	450000	450000
941	0.285425	0.285717	0.285571	0.999737	4.25886e-06	4310.15	450000	2810.15	2810.15		4310.15	450000	4310.15	6322.26	3449.32	3405.04	3405.04	450000	450000	450000	450000	450000
942	0.285717	0.286009	0.285863	0.999741	4.19426e-06	4313.99	450000	2813.99	2813.99		4313.99	450000	4313.99	6335.38	3450.62	3405.24	3405.24	450000	450000	450000	450000	450000
943	0.286009	0.286301	0.286155	0.999745	4.13058e-06	4317.83	450000	2817.83	2817.83		4317.83	450000	4317.83	6348.52	3451.91	3405.44	3405.44	450000	450000	450000	450000	450000
944	0.286301	0.286592	0.286447	0.999749	4.06781e-06	4321.67	450000	2821.67	2821.67		4321.67	450000	4321.67	6361.69	3453.21	3405.62	3405.62	450000	450000	450000	450000	450000
945	0.286592	0.286884	0.286738	0.999753	4.00595e-06	4325.51	450000	2825.51	2825.51		4325.51	450000	4325.51	6374.89	3454.5	3405.81	3405.81	450000	450000	450000	450000	450000
946	0.286884	0.287176	0.28703	0.999757	3.94497e-06	4329.35	450000	2829.35	2829.35		4329.35	450000	4329.35	6388.12	3455.79	3405.98	3405.98	450000	450000	450000	450000	450000
947	0.287176	0.287468	0.287322	0.999761	3.88488e-06	4333.19	450000	2833.19	2833.19		4333.19	450000	4333.19	6401.37	3457.08	3406.15	3406.15	450000	450000	450000	450000	450000
948	0.287468	0.28776	0.287614	0.999765	3.82565e-06	4337.03	450000	2837.03	2837.03		4337.03	450000	4337.03	6414.65	3458.37	3406.31	3406.31	450000	450000	450000	450000	450000
949	0.28776	0.288052	0.287906	0.999768	3.76728e-06	4340.87	450000	2840.87	2840.87		4340.87	450000	4340.87	6427.96	3459.66	3406.47	3406.47	450000	450000	450000	450000	450000
950	0.288052	0.288344	0.288198	0.999772	3.70974e-06	4344.71	450000	2844.71	2844.71		4344.71	450000	4344.71	6441.3	3460.95	3406.62	3406.62	450000	450000	450000	450000	450000
951	0.288344	0.288635	0.28849	0.999776	3.65304e-06	4348.55	450000	2848.55	2848.55		4348.55	450000	4348.55	6454.66	3462.24	3406.76	3406.76	450000	450000	450000	450000	450000
952	0.288635	0.288927	0.288781	0.999779	3.59717e-06	4352.39	450000	2852.39	2852.39		4352.39	450000	4352.39	6468.05	3463.52	3406.9	3406.9	450000	450000	450000	450000	450000
953	0.288927	0.289219	0.289073	0.999783	3.5421e-06	4356.23	450000	2856.23	2856.23		4356.23	450000	4356.23	6481.47	3464.8	3407.03	3407.03	450000	450000	450000	450000	450000
954	0.289219	0.289511	0.289365	0.999786	3.48782e-06	4360.07	450000	2860.07	2860.07		4360.07	450000	4360.07	6494.92	3466.09	3407.16	3407.16	450000	450000	450000	450000	450000
955	0.289511	0.289803	0.289657	0.99979	3.43434e-06	4363.91	450000	2863.91	2863.91		4363.91	450000	4363.91	6508.4	3467.37	3407.28	3407.28	450000	450000	450000	450000	450000
956	0.289803	0.290095	0.289949	0.999793	3.38163e-06	4367.75	450000	2867.75	2867.75		4367.75	450000	4367.75	6521.9	3468.65	3407.39	3407.39	450000	450000	450000	450000	450000
957	0.290095	0.290387	0.290241	0.999797	3.32969e-06	4371.59	450000	2871.59	2871.59		4371.59	450000	4371.59	6535.43	3469.92	3407.49	3407.49	450000	450000	450000	450000	450000
958	0.290387	0.290678	0.290532	0.9998	3.27851e-06	4375.43	450000	2875.43	2875.43		4375.43	450000	4375.43	6548.99	3471.2	3407.59	3407.59	450000	450000	450000	450000	450000
959	0.290678	0.29097	0.290824	0.999803	3.22807e-06	4379.27	450000	2879.27	2879.27		4379.27	450000	4379.27	6562.58	3472.48	3407.69	3407.69	450000	450000	450000	450000	450000
960	0.29097	0.291262	0.291116	0.999806	3.17836e-06	4383.11	450000	2883.11	2883.11		4383.11	450000	4383.11	6576.19	3473.75	3407.77	3407.77	450000	450000	450000	450000	450000
961	0.291262	0.291554	0.291408	0.999809	3.12939e-06	4386.95	450000	2886.95	2886.95		4386.95	450000	4386.95	6589.84	3475.02	3407.86	3407.86	450000	450000	450000	450000	450000
962	0.291554	0.291846	0.2917	0.999813	3.08112e-06	4390.79	450000	2890.79	2890.79		4390.79	450000	4390.79	6603.51	3476.3	3407.93	3407.93	450000	450000	450000	450000	450000
963	0.291846	0.292138	0.291992	0.999816	3.03356e-06	4394.63	450000	2894.63	2894.63		4394.63	450000	4394.63	6617.21	3477.57	3408	3408	450000	450000	450000	450000	450000
964	0.292138	0.292429	0.292284	0.999819	2.9867e-06	4398.47	450000	2898.47	2898.47		4398.47	450000	4398.47	6630.94	3478.83	3408.06	3408.06	450000	450000	450000	450000	450000
965	0.292429	0.292721	0.292575	0.999821	2.94053e-06	4402.31	450000	2902.31	2902.31		4402.31	450000	4402.31	6644.69	3480.1	3408.12	3408.12	450000	450000	450000	450000	450000
966	0.292721	0.293013	0.292867	0.999824	2.89503e-06	4406.15	450000	2906.15	2906.15		4406.15	450000	4406.15	6658.48	3481.37	3408.16	3408.16	450000	450000	450000	450000	450000
967	0.293013	0.293305	0.293159	0.999827	2.85019e-06	4409.99	450000	2909.99	2909.99		4409.99	450000	4409.99	6672.29	3482.63	3408.21	3408.21	450000	450000	450000	450000	450000
968	0.293305	0.293597	0.293451	0.99983	2.80602e-06	4413.83	450000	2913.83	2913.83		4413.83	450000	4413.83	6686.14	3483.9	3408.24	3408.24	450000	450000	450000	450000	450000
969	0.293597	0.293889	0.293743	0.999833	2.7625e-06	4417.67	450000	2917.67	2917.67		4417.67	450000	4417.67	6700.01	3485.16	3408.27	3408.27	450000	450000	450000	450000	450000
970	0.293889	0.294181	0.294035	0.999836	2.71961e-06	4421.51	450000	2921.51	2921.51		4421.51	450000	4421.51	6713.91	3486.42	3408.3	3408.3	450000	450000	450000	450000	450000
971	0.294181	0.294472	0.294326	0.999838	2.67736e-06	4425.35	450000	2925.35	2925.35		4425.35	450000	4425.35	6727.84	3487.68	3408.32	3408.32	450000	450000	450000	450000	450000
972	0.294472	0.294764	0.294618	0.999841	2.63573e-06	4429.19	450000	2929.19	2929.19		4429.19	450000	4429.19	6741.8	3488.94	3408.33	3408.33	450000	450000	450000	450000	450000
973	0.294764	0.295056	0.29491	0.999843	2.59472e-06	4433.03	450000	2933.03	2933.03		4433.03	450000	4433.03	6755.79	3490.2	3408.33	3408.33	450000	450000	450000	450000	450000
974	0.295056	0.295348	0.295202	0.999846	2.55431e-06	4436.87	450000	2936.87	2936.87		4436.87	450000	4436.87	6769.8	3491.46	3408.33	3408.33	450000	450000	450000	450000	450000
975	0.295348	0.29564	0.295494	0.999848	2.51449e-06	4440.71	450000	2940.71	2940.71		4440.71	450000	4440.71	6783.85	3492.71	3408.32	3408.32	450000	450000	450000	450000	450000
976	0.29564	0.295932	0.295786	0.999851	2.47527e-06	4444.55	450000	2944.55	2944.55		4444.55	450000	4444.55	6797.92	3493.97	3408.31	3408.31	450000	450000	450000	450000	450000
977	0.295932	0.296223	0.296078	0.999853	2.43663e-06	4448.39	450000	2948.39	2948.39		4448.39	450000	4448.39	6812.03	3495.22	3408.29	3408.29	450000	450000	450000	450000	450000
978	0.296223	0.296515	0.296369	0.999856	2.39856e-06	4452.23	450000	2952.23	2952.23		4452.23	450000	4452.23	6826.16	3496.47	3408.26	3408.26	450000	450000	450000	450000	450000
979	0.296515	0.296807	0.296661	0.999858	2.36105e-06	4456.07	450000	2956.07	2956.07		4456.07	450000	4456.07	6840.32	3497.72	3408.23	3408.23	450000	450000	450000	450000	450000
980	0.296807	0.297099	0.296953	0.99986	2.3241e-06	4459.91	450000	2959.91	2959.91		4459.91	450000	4459.91	6854.51	3498.97	3408.19	3408.19	450000	450000	450000	450000	450000
981	0.297099	0.297391	0.297245	0.999863	2.2877e-06	4463.75	450000	2963.75	2963.75		4463.75	450000	4463.75	6868.73	3500.22	3408.15	3408.15	450000	450000	450000	450000	450000
982	0.297391	0.297683	0.297537	0.999865	2.25185e-06	4467.59	450000	2967.59	2967.59		4467.59	450000	4467.59	6882.98	3501.47	3408.09	3408.09	450000	450000	450000	450000	450000
983	0.297683	0.297975	0.297829	0.999867	2.21652e-06	4471.43	450000	2971.43	2971.43		4471.43	450000	4471.43	6897.26	3502.71	3408.04	3408.04	450000	450000	450000	450000	450000
984	0.297975	0.298266	0.29812	0.999869	2.18172e-06	4475.27	450000	2975.27	2975.27		4475.27	450000	4475.27	6911.57	3503.96	3407.97	3407.97	450000	450000	450000	450000	450000
985	0.298266	0.298558	0.298412	0.999872	2.14744e-06	4479.11	450000	2979.11	2979.11		4479.11	450000	4479.11	6925.91	3505.2	3407.9	3407.9	450000	450000	450000	450000	450000
986	0.298558	0.29885	0.298704	0.999874	2.11368e-06	4482.95	450000	2982.95	2982.95		4482.95	450000	4482.95	6940.28	3506.44	3407.83	3407.83	450000	450000	450000	450000	450000
987	0.29885	0.299142	0.298996	0.999876	2.08041e-06	4486.79	450000	2986.79	2986.79		4486.79	450000	4486.79	6954.68	3507.68	3407.74	3407.74	450000	450000	450000	450000	450000
988	0.299142	0.299434	0.299288	0.999878	2.04765e-06	4490.63	450000	2990.63	2990.63		4490.63	450000	4490.63	6969.11	3508.92	3407.65	3407.65	450000	450000	450000	450000	450000
989	0.299434	0.299726	0.29958	0.99988	2.01537e-06	4494.47	450000	2994.47	2994.47		4494.47	450000	4494.47	6983.57	3510.16	3407.56	3407.56	450000	450000	450000	450000	450000
990	0.299726	0.300017	0.299872	0.999882	1.98358e-06	4498.31	450000	2998.31	2998.31		4498.31	450000	4498.31	6998.06	3511.4	3407.45	3407.45	450000	450000	450000	450000	450000
991	0.300017	0.300309	0.300163	0.999884	1.95226e-06	4502.15	450000	3002.15	3002.15		4502.15	450000	4502.15	7012.58	3512.63	3407.35	3407.35	450000	450000	450000	450000	450000
992	0.300309	0.300601	0.300455	0.999886	1.92142e-06	4505.99	450000	3005.99	3005.99		4505.99	450000	4505.99	7027.13	3513.87	3407.23	3407.23	450000	450000	450000	450000	450000
993	0.300601	0.300893	0.300747	0.999888	1.89103e-06	4509.83	450000	3009.83	3009.83		4509.83	450000	4509.83	7041.71	3515.1	3407.11	3407.11	450000	450000	450000	450000	450000
994	0.300893	0.301185	0.301039	0.999889	1.86111e-06	4513.67	450000	3013.67	3013.67		4513.67	450000	4513.67	7056.32	3516.33	3406.98	3406.98	450000	450000	450000	450000	450000
995	0.301185	0.301477	0.301331	0.999891	1.83163e-06	4517.51	450000	3017.51	3017.51		4517.51	450000	4517.51	7070.96	3517.56	3406.85	3406.85	450000	450000	450000	450000	450000
996	0.301477	0.301769	0.301623	0.999893	1.8026e-06	4521.35	450000	3021.35	3021.35		4521.35	450000	4521.35	7085.63	3518.79	3406.71	3406.71	450000	450000	450000	450000	450000
997	0.301769	0.30206	0.301914	0.999895	1.77401e-06	4525.19	450000	3025.19	3025.19		4525.19	450000	4525.19	7100.33	3520.02	3406.56	3406.56	450000	450000	450000	450000	450000
998	0.30206	0.302352	0.302206	0.999897	1.74584e-06	4529.03	450000	3029.03	3029.03		4529.03	450000	4529.03	7115.06	3521.25	3406.41	3406.41	450000	450000	450000	450000	450000
999	0.302352	0.302644	0.302498	0.999898	1.71811e-06	4532.87	450000	3032.87	3032.87		4532.87	450000	4532.87	7129.82	3522.48	3406.25	3406.25	450000	450000	450000	450000	450000
1000	0.302644	0.302936	0.30279	0.9999	1.69079e-06	4536.71	450000	3036.71	3036.71		4536.71	450000	4536.71	7144.61	3523.7	3406.09	3406.09	450000	450000	450000	450000	450000
Aggregated data for display on results worksheet
	Interval	0.00486412
Index	Lower bound interval	Upper bound interval	Midpoint	Cumulative density	Density within interval	Predicted DALYs averted	Predicted costs incurred	Net DALYs | endpoint	Net DALYs with research		Selected models		Outcomes predicted by different functions					Costs predicted by different functions
											Outcomes	Costs	Linear	Exponential	Logarithmic	Polynomial - quadratic	Polynomial - cubic	Linear	Exponential	Logarithmic	Polynomial - quadratic	Polynomial - cubic
1	0.0110887	0.0159528	0.0135207	0.000610658	0.000610658	730.536	450000	-769.464	0		730.536	450000	730.536	915.855	-425.863	473.868	473.868	450000	450000	450000	450000	450000
2	0.0159528	0.0208169	0.0183849	0.00217568	0.00156502	794.538	450000	-705.462	0		794.538	450000	794.538	948.043	-35.4536	574.41	574.41	450000	450000	450000	450000	450000
3	0.0208169	0.025681	0.023249	0.00568639	0.00351071	858.539	450000	-641.461	0		858.539	450000	858.539	981.364	262.762	673.2	673.2	450000	450000	450000	450000	450000
4	0.025681	0.0305452	0.0281131	0.0121509	0.00646453	922.541	450000	-577.459	0		922.541	450000	922.541	1015.85	504.113	770.237	770.237	450000	450000	450000	450000	450000
5	0.0305452	0.0354093	0.0329772	0.022541	0.0103901	986.542	450000	-513.458	0		986.542	450000	986.542	1051.56	706.851	865.521	865.521	450000	450000	450000	450000	450000
6	0.0354093	0.0402734	0.0378413	0.0376602	0.0151192	1050.54	450000	-449.456	0		1050.54	450000	1050.54	1088.52	881.645	959.053	959.053	450000	450000	450000	450000	450000
7	0.0402734	0.0451375	0.0427055	0.0580528	0.0203926	1114.55	450000	-385.454	0		1114.55	450000	1114.55	1126.77	1035.27	1050.83	1050.83	450000	450000	450000	450000	450000
8	0.0451375	0.0500017	0.0475696	0.0839583	0.0259055	1178.55	450000	-321.453	0		1178.55	450000	1178.55	1166.38	1172.31	1140.86	1140.86	450000	450000	450000	450000	450000
9	0.0500017	0.0548658	0.0524337	0.115306	0.0313481	1242.55	450000	-257.451	0		1242.55	450000	1242.55	1207.37	1296	1229.13	1229.13	450000	450000	450000	450000	450000
10	0.0548658	0.0597299	0.0572978	0.151744	0.0364381	1306.55	450000	-193.45	0		1306.55	450000	1306.55	1249.8	1408.7	1315.65	1315.65	450000	450000	450000	450000	450000
11	0.0597299	0.064594	0.062162	0.192686	0.0409418	1370.55	450000	-129.448	0		1370.55	450000	1370.55	1293.73	1512.22	1400.42	1400.42	450000	450000	450000	450000	450000
12	0.064594	0.0694581	0.0670261	0.237372	0.0446855	1434.55	450000	-65.4464	0		1434.55	450000	1434.55	1339.2	1607.93	1483.44	1483.44	450000	450000	450000	450000	450000
13	0.0694581	0.0743223	0.0718902	0.284931	0.0475591	1498.56	450000	-1.44478	0		1498.56	450000	1498.56	1386.27	1696.93	1564.7	1564.7	450000	450000	450000	450000	450000
14	0.0743223	0.0791864	0.0767543	0.334443	0.0495125	1562.56	450000	62.5568	62.5568		1562.56	450000	1562.56	1434.99	1780.11	1644.22	1644.22	450000	450000	450000	450000	450000
15	0.0791864	0.0840505	0.0816184	0.384992	0.0505486	1626.56	450000	126.558	126.558		1626.56	450000	1626.56	1485.42	1858.17	1721.97	1721.97	450000	450000	450000	450000	450000
16	0.0840505	0.0889146	0.0864826	0.435705	0.0507134	1690.56	450000	190.56	190.56		1690.56	450000	1690.56	1537.63	1931.72	1797.98	1797.98	450000	450000	450000	450000	450000
17	0.0889146	0.0937787	0.0913467	0.485791	0.0500858	1754.56	450000	254.562	254.562		1754.56	450000	1754.56	1591.67	2001.23	1872.23	1872.23	450000	450000	450000	450000	450000
18	0.0937787	0.0986429	0.0962108	0.534558	0.0487665	1818.56	450000	318.563	318.563		1818.56	450000	1818.56	1647.61	2067.14	1944.74	1944.74	450000	450000	450000	450000	450000
19	0.0986429	0.103507	0.101075	0.581427	0.0468693	1882.56	450000	382.565	382.565		1882.56	450000	1882.56	1705.52	2129.8	2015.48	2015.48	450000	450000	450000	450000	450000
20	0.103507	0.108371	0.105939	0.625939	0.0445123	1946.57	450000	446.566	446.566		1946.57	450000	1946.57	1765.47	2189.51	2084.48	2084.48	450000	450000	450000	450000	450000
21	0.108371	0.113235	0.110803	0.667751	0.0418117	2010.57	450000	510.568	510.568		2010.57	450000	2010.57	1827.51	2246.55	2151.72	2151.72	450000	450000	450000	450000	450000
22	0.113235	0.118099	0.115667	0.706628	0.0388769	2074.57	450000	574.57	574.57		2074.57	450000	2074.57	1891.74	2301.13	2217.21	2217.21	450000	450000	450000	450000	450000
23	0.118099	0.122963	0.120531	0.742435	0.035807	2138.57	450000	638.571	638.571		2138.57	450000	2138.57	1958.23	2353.46	2280.95	2280.95	450000	450000	450000	450000	450000
24	0.122963	0.127828	0.125396	0.775123	0.0326883	2202.57	450000	702.573	702.573		2202.57	450000	2202.57	2027.06	2403.72	2342.94	2342.94	450000	450000	450000	450000	450000
25	0.127828	0.132692	0.13026	0.804717	0.029594	2266.57	450000	766.574	766.574		2266.57	450000	2266.57	2098.3	2452.07	2403.17	2403.17	450000	450000	450000	450000	450000
26	0.132692	0.137556	0.135124	0.8313	0.0265833	2330.58	450000	830.576	830.576		2330.58	450000	2330.58	2172.05	2498.65	2461.65	2461.65	450000	450000	450000	450000	450000
27	0.137556	0.14242	0.139988	0.855003	0.0237027	2394.58	450000	894.577	894.577		2394.58	450000	2394.58	2248.39	2543.58	2518.38	2518.38	450000	450000	450000	450000	450000
28	0.14242	0.147284	0.144852	0.875989	0.0209862	2458.58	450000	958.579	958.579		2458.58	450000	2458.58	2327.41	2586.97	2573.35	2573.35	450000	450000	450000	450000	450000
29	0.147284	0.152148	0.149716	0.894447	0.0184573	2522.58	450000	1022.58	1022.58		2522.58	450000	2522.58	2409.21	2628.93	2626.58	2626.58	450000	450000	450000	450000	450000
30	0.152148	0.157012	0.15458	0.910577	0.01613	2586.58	450000	1086.58	1086.58		2586.58	450000	2586.58	2493.88	2669.55	2678.05	2678.05	450000	450000	450000	450000	450000
31	0.157012	0.161876	0.159444	0.924587	0.0140105	2650.58	450000	1150.58	1150.58		2650.58	450000	2650.58	2581.53	2708.91	2727.77	2727.77	450000	450000	450000	450000	450000
32	0.161876	0.166741	0.164308	0.936686	0.0120985	2714.59	450000	1214.59	1214.59		2714.59	450000	2714.59	2672.27	2747.09	2775.73	2775.73	450000	450000	450000	450000	450000
33	0.166741	0.171605	0.169173	0.947075	0.010389	2778.59	450000	1278.59	1278.59		2778.59	450000	2778.59	2766.19	2784.15	2821.94	2821.94	450000	450000	450000	450000	450000
34	0.171605	0.176469	0.174037	0.955947	0.00887279	2842.59	450000	1342.59	1342.59		2842.59	450000	2842.59	2863.41	2820.16	2866.4	2866.4	450000	450000	450000	450000	450000
35	0.176469	0.181333	0.178901	0.963486	0.00753838	2906.59	450000	1406.59	1406.59		2906.59	450000	2906.59	2964.05	2855.19	2909.11	2909.11	450000	450000	450000	450000	450000
36	0.181333	0.186197	0.183765	0.969858	0.00637236	2970.59	450000	1470.59	1470.59		2970.59	450000	2970.59	3068.22	2889.27	2950.07	2950.07	450000	450000	450000	450000	450000
37	0.186197	0.191061	0.188629	0.975219	0.00536035	3034.59	450000	1534.59	1534.59		3034.59	450000	3034.59	3176.06	2922.46	2989.27	2989.27	450000	450000	450000	450000	450000
38	0.191061	0.195925	0.193493	0.979706	0.00448764	3098.6	450000	1598.6	1598.6		3098.6	450000	3098.6	3287.68	2954.8	3026.72	3026.72	450000	450000	450000	450000	450000
39	0.195925	0.200789	0.198357	0.983446	0.00373965	3162.6	450000	1662.6	1662.6		3162.6	450000	3162.6	3403.23	2986.34	3062.41	3062.41	450000	450000	450000	450000	450000
40	0.200789	0.205654	0.203221	0.986548	0.00310229	3226.6	450000	1726.6	1726.6		3226.6	450000	3226.6	3522.84	3017.12	3096.36	3096.36	450000	450000	450000	450000	450000
41	0.205654	0.210518	0.208086	0.98911	0.00256223	3290.6	450000	1790.6	1790.6		3290.6	450000	3290.6	3646.66	3047.17	3128.55	3128.55	450000	450000	450000	450000	450000
42	0.210518	0.215382	0.21295	0.991217	0.00210709	3354.6	450000	1854.6	1854.6		3354.6	450000	3354.6	3774.83	3076.53	3158.99	3158.99	450000	450000	450000	450000	450000
43	0.215382	0.220246	0.217814	0.992943	0.00172549	3418.6	450000	1918.6	1918.6		3418.6	450000	3418.6	3907.5	3105.22	3187.68	3187.68	450000	450000	450000	450000	450000
44	0.220246	0.22511	0.222678	0.99435	0.00140716	3482.6	450000	1982.6	1982.6		3482.6	450000	3482.6	4044.83	3133.28	3214.61	3214.61	450000	450000	450000	450000	450000
45	0.22511	0.229974	0.227542	0.995493	0.0011429	3546.61	450000	2046.61	2046.61		3546.61	450000	3546.61	4186.99	3160.73	3239.79	3239.79	450000	450000	450000	450000	450000
46	0.229974	0.234838	0.232406	0.996418	0.000924561	3610.61	450000	2110.61	2110.61		3610.61	450000	3610.61	4334.15	3187.6	3263.22	3263.22	450000	450000	450000	450000	450000
47	0.234838	0.239702	0.23727	0.997163	0.000744993	3674.61	450000	2174.61	2174.61		3674.61	450000	3674.61	4486.48	3213.92	3284.9	3284.9	450000	450000	450000	450000	450000
48	0.239702	0.244566	0.242134	0.997761	0.000597974	3738.61	450000	2238.61	2238.61		3738.61	450000	3738.61	4644.16	3239.7	3304.82	3304.82	450000	450000	450000	450000	450000
49	0.244566	0.249431	0.246999	0.998239	0.000478131	3802.61	450000	2302.61	2302.61		3802.61	450000	3802.61	4807.39	3264.97	3322.99	3322.99	450000	450000	450000	450000	450000
50	0.249431	0.254295	0.251863	0.99862	0.000380862	3866.61	450000	2366.61	2366.61		3866.61	450000	3866.61	4976.35	3289.74	3339.41	3339.41	450000	450000	450000	450000	450000
51	0.254295	0.259159	0.256727	0.998922	0.000302245	3930.62	450000	2430.62	2430.62		3930.62	450000	3930.62	5151.25	3314.04	3354.08	3354.08	450000	450000	450000	450000	450000
52	0.259159	0.264023	0.261591	0.999161	0.000238968	3994.62	450000	2494.62	2494.62		3994.62	450000	3994.62	5332.29	3337.89	3366.99	3366.99	450000	450000	450000	450000	450000
53	0.264023	0.268887	0.266455	0.999349	0.000188245	4058.62	450000	2558.62	2558.62		4058.62	450000	4058.62	5519.7	3361.3	3378.15	3378.15	450000	450000	450000	450000	450000
54	0.268887	0.273751	0.271319	0.999497	0.000147748	4122.62	450000	2622.62	2622.62		4122.62	450000	4122.62	5713.7	3384.28	3387.56	3387.56	450000	450000	450000	450000	450000
55	0.273751	0.278615	0.276183	0.999612	0.000115543	4186.62	450000	2686.62	2686.62		4186.62	450000	4186.62	5914.52	3406.85	3395.22	3395.22	450000	450000	450000	450000	450000
56	0.278615	0.283479	0.281047	0.999702	9.00331e-05	4250.62	450000	2750.62	2750.62		4250.62	450000	4250.62	6122.39	3429.03	3401.12	3401.12	450000	450000	450000	450000	450000
57	0.283479	0.288344	0.285912	0.999772	6.99042e-05	4314.63	450000	2814.63	2814.63		4314.63	450000	4314.63	6337.57	3450.83	3405.27	3405.27	450000	450000	450000	450000	450000
58	0.288344	0.293208	0.290776	0.999826	5.40821e-05	4378.63	450000	2878.63	2878.63		4378.63	450000	4378.63	6560.31	3472.26	3407.67	3407.67	450000	450000	450000	450000	450000
59	0.293208	0.298072	0.29564	0.999868	4.16926e-05	4442.63	450000	2942.63	2942.63		4442.63	450000	4442.63	6790.88	3493.34	3408.32	3408.32	450000	450000	450000	450000	450000
60	0.298072	0.302936	0.300504	0.9999	3.20276e-05	4506.63	450000	3006.63	3006.63		4506.63	450000	4506.63	7029.55	3514.07	3407.21	3407.21	450000	450000	450000	450000	450000
Values for graphing		Data to produce verticle lines on plot
		19	13	0
		19	13	1

## Sheet: Controls
	Proportion or probability	Beta
	Cost	Gamma
	Hazard ratio, relative risk, odds ratio	Lognorm
	Mean difference, change from baseline	Normal
	One patient
	All patients
	Linear
	Exponential
	Logarithmic
	Polynomial - quadratic
	Polynomial - cubic
